# Genomics, Molecular and Evolutionary Perspective of NAC Transcription Factors

Tapan Kumar Mohanta<sup>1\*s</sup>, Dhananjay Yadav<sup>2s</sup>, Adil Khan<sup>1</sup>, Abeer Hashem<sup>3,4</sup>, Baby Tabassum<sup>5</sup>,  
Abdul Latif Khan<sup>1</sup>, Eslayed Fathi Abda\_Allah<sup>6</sup>, Ahmed Al-Harrasi<sup>1\*</sup>

<sup>1</sup>Natural and Medicinal Plant Sciences Research Center, University of Nizwa, Nizwa, 616, Oman

<sup>2</sup>Dept. of Medical Biotechnology, Yeungnam University, Gyeongsan, 38541, Republic of Korea.

<sup>3</sup>Botany and Microbiology Department, College of Science, King Saud University, P.O. Box. 2460, Riyadh 11451, Saudi Arabia.

<sup>4</sup>Mycology and Plant Disease Survey Department, Plant Pathology Research Institute, ARC, Giza 12511, Egypt.

<sup>5</sup>Toxicology laboratory, Department of Zoology, Raza P.G. College, Rampur, Uttar Pradesh, 244091, India

<sup>6</sup>Plant Production Department, College of Food and Agricultural Sciences, King Saud University, P.O. Box. 2460 Riyadh 11451, Saudi Arabia.

s Contributed equally

\*Corresponding author

Tapan Kumar Mohanta, E-mail: [nostoc.tapan@gmail.com](mailto:nostoc.tapan@gmail.com), [tapan.mohanta@unizwa.edu.om](mailto:tapan.mohanta@unizwa.edu.om)

Ahmed Al-Harrasi, E-mail: [aharrasi@unizwa.edu.om](mailto:aharrasi@unizwa.edu.om)

## Abstract

NAC (NAM, ATAF1,2, and CUC2) transcription factors are one of the largest transcription factor families found in plants and are involved in diverse developmental and signalling events. Despite the availability of comprehensive genomic information from diverse plant species, the basic genomic, biochemical, and evolutionary details of NAC TFs have not been established. Therefore, NAC TFs family proteins from 160 plant species were analyzed in the current study. The analysis, among other things, identified the first algal NAC TF in the Charophyte, *Klebsormidium flaccidum*. Furthermore, our analysis revealed that NAC TFs are membrane bound and contain monopartite, bipartite, and multipartite nuclear localization signals. NAC TFs were also found to encode a novel chimeric protein domain and are part of a complex interactome network. Synonymous codon usage is absent in NAC TFs and it appears that they have evolved from orthologous ancestors and undergone significant duplication events to give rise to paralogous NAC TFs.

Keywords: NAC transcription factor, Transmembrane domain, Chimeric NAC transcription factor, Nuclear localization signal, Codon usage, Gene duplication

## 37 Introduction

38 Next-generation sequencing (NGS) has fostered the sequencing of many plant genomes. The  
39 availability of so many genomes has allowed researchers to readily identify genes, examine  
40 genetic diversity within a species, and gain insight into the evolution of genes and gene families.  
41 Gene expression is regulated in part by different families of proteins known as transcription  
42 factors (TFs). TFs are involved in inducing the transcription of DNA into RNA. They include  
43 numerous and diverse proteins, all of which contain one or more DNA-binding motifs. The DNA-  
44 binding domain enables them to bind to the promoter or repressor sequence of DNA that is  
45 present either at the upstream, downstream, or within an intron region of a coding gene. Some TFs  
46 bind to a DNA promoter region located near the transcription start site of a gene and help to form  
47 the transcription initiation complex. Other TFs bind to regulatory enhancer sequences and  
48 stimulate or repress transcription of the related genes. Regulating transcription is of paramount  
49 importance to controlling gene expression and TFs enable the expression of an individual gene in  
50 a unique manner, such as during different stages of development or in response to biotic or abiotic  
51 stress. TFs act as a molecular switch for temporal and spatial gene regulation. A considerable  
52 portion of a genome consists of genes encoding transcription factors. For example, there are at  
53 least 52 TF families in *Arabidopsis thaliana*, and the NAC (no apical meristem (NAM) TF family  
54 is one of them.

55 NAC TFs are characterised by the presence of a conserved N-terminal NAC domain comprising  
56 approximately 150 amino acids and a diversified C-terminal end. The DNA binding NAC domain  
57 is divided into five sub-domains designated A-E. Sub-domain A is apparently involved in the  
58 formation of functional dimers, while sub-domains B and E appear to be responsible for the  
59 functional divergence of NAC genes<sup>1-4</sup>. The dimeric architecture of NAC proteins can remain  
60 stable even at a concentration of 5M NaCl<sup>4</sup>. The dimerization is established by Leu14-Thr23,  
61 and Glu26-Tyr31 amino acid residues. The dimeric form is responsible for the functional unit of  
62 stress-responsive SNAC1 and can modulate DNA-binding specificity. Sub-domains C and D  
63 contain positively charged amino acids that bind to DNA. The crystal structure of the SNAC1 TF  
64 revealed the presence of a central semi- $\beta$ -barrel formed from seven twisted anti-parallel  $\beta$ -strands  
65 with three  $\alpha$ -helices<sup>4</sup>. The NAC domain is most responsible for DNA binding activity that lies  
66 between amino acids Val119-Ser183, Lys123-Lys126, with Lys79, Arg85, and Arg88 residue  
67 within different strands of  $\beta$ -sheets<sup>2,5,6</sup>. The remaining portion of the NAC domain contains a  
68 loop region composed of the amino acids, Gly144-Gly149 and Lys180-Asn183, which are very  
69 flexible in nature<sup>4</sup>. The loop region of SNAC1 is quite long and different from the loop region of  
70 ANAC, an abscisic-acid-responsive NAC, and could underlie the basis for different biological  
71 functions. NAC TFs possess mono or bipartite nuclear localization signals which contain a Lys  
72 residue in sub-domain D<sup>1,6-8</sup>. In addition, NAC proteins, as part of a mechanism of self-  
73 regulation, also modulate the expression of several other proteins<sup>6,9</sup>. The D subunit of a few NAC  
74 TFs contain a hydrophobic negative regulatory domain (NRD), comprised of **L-V-F-Y** amino  
75 acids, which is involved in suppressing transcriptional activity<sup>10</sup>. For example, the NRD domain  
76 can suppress the transcriptional activity of Dof, WRKY, and APETALA 2/dehydration responsive  
77 elements (AP2/DRE) TFs<sup>10</sup>.

78 Studies indicate that the diverse C-terminal domain contains a transcription regulatory region  
79 (TRR) which has several group-specific motifs that can activate or repress transcription activity  
80 <sup>11-14</sup>. The diverse C-terminal region imparts differences in the function of individual NAC  
81 proteins by regulating the interaction of NAC TFs with diverse target proteins. Although the C-  
82 terminal region of NAC TFs is diverse, it also contains group-specific conserved motifs <sup>15</sup>.  
83 Although the diverse aspects of NAC TFs have been studied, most were conducted within  
84 individual plant species. A detailed comparative study of the genomic, molecular biology, and  
85 evolution of NAC TFs has not been conducted. Therefore, a comprehensive analysis of NAC TFs  
86 is presented in the current study.

## 87 **Results and discussion**

### 88 *NAC transcription factors exhibit diverse genomic and biochemical features*

89 Advancements in genome sequencing technology have enabled the discovery of the genomic  
90 details of hundreds of plant species. The availability this genome sequence data allowed us to  
91 characterize the genomic details of NAC TFs in diverse plant species. The presence of NAC TFs  
92 in 160 species (18774 NAC sequences) was identified and served as the basis of the conducted  
93 analyses. Comparisons of NAC sequences revealed that *Brassica napus* has the highest number  
94 (410) of NAC TFs, while the pteridophyte plant, *Marchantia polymorpha*, was found to contain  
95 the lowest number (9) (Table 1). On average, monocot plants contain a higher (141.20) number of  
96 NAC TFs relative to dicot plants (125.56). Except for *Hordeum vulgare* (76), *Saccharum*  
97 *officinatum* (44), and *Zostera marina* (62) all other monocot species possess more than one  
98 hundred NAC TFs each (Table 1). Lower eukaryotic plants, bryophytes and pteridophytes also  
99 possess NAC TFs. In addition, the algal species, *Klebsormidium flaccidum*, also contains NAC  
100 TFs and this finding represents the first report of NAC TFs in algae (Table 1). A NAC TF in  
101 *Trifolium pratense* (Tp57577\_TGAC\_v2\_mRNA14116) was found to be the largest NAC TF,  
102 comprising 3101 amino acids, while a NAC TF in *Fragaria x ananassa*  
103 (FANhyb\_icon00034378\_a.1.g00001.1) was found to be the smallest NAC TF, comprising only  
104 25 amino acids. Although it only contains a 25 amino acid sequence, it still encodes a NAC  
105 domain. Typically, NAC TFs contain a single NAC domain located near the N-terminal region of  
106 the protein. The current analysis, however, also identified NAC TFs with two NAC domains. At  
107 least 77 of the 160 studied species were found to contain two NAC domains (Table 1).

108 Multiple sequence alignment revealed the presence of a conserved consensus sequence at  
109 the N-terminus. The major conserved consensus sequences are P-G-F-R-F-H-P-T-D-D/E-L-I/V,  
110 Y-L-x<sub>2</sub>-K, D-L-x-K-x<sub>2</sub>-P-W-x-L-P, E-W-Y-F-F, G-Y-W-K-A/T-T-G-x-D-x<sub>1-2</sub>-I/V, G-x-K-K-x-  
111 L-V-F-Y, and T-x-W-x-M-H-E-Y. Among these consensus sequences, D-D/E-L-I/V, E-W-Y-F-F,  
112 G-Y-W-K, and M-H-E-Y are the conserved motifs most observed. The D-D/E-L motif is a  
113 characteristic feature of the calcium-binding motifs present in the EF-hand of calcium-dependent  
114 protein kinases and the presence of this motif in NAC TFs indicates that they have the potential to  
115 regulate Ca<sup>2+</sup> signalling events in cells <sup>16</sup>. The D-D-E/E motif is located in the β' sheet whereas  
116 the Y-L-x<sub>2</sub>-K motif is in the α1a/b chain. Except for G-F-R-F-H-P-T-D-D/E-L-I/V, the conserved  
117 consensus sequences contain the positively charged amino acids Lys (L) and Arg (K) that can  
118 bind to negatively charged DNA. Welner et al. (2012) published the crystal structure of

119 ANAC019 and reported that Y<sup>94</sup>-W-K-A-T-G-T-D in β<sub>3</sub>, I<sup>11</sup>-K-K-A-L-V-F-Y of β<sub>4</sub>, K<sup>123</sup>-A-P-K-  
120 G-T-K-T-N-W in the loop between β<sub>4</sub> and β<sub>5</sub>, and I<sup>133</sup>-M-H-E-Y-R of β<sub>5</sub> and Y<sup>160</sup>-K-K-Q at the  
121 C-terminal end are located close to the bound DNA and are associated with DNA binding activity  
122 <sup>17</sup>. They reported that Y<sup>94</sup>-W-K-A-T-G-T-D is responsible for the specific recognition of DNA  
123 and binds at the major groove within DNA, whereas I<sup>11</sup>-K-K-A-L-V-F-Y, K<sup>123</sup>-A-P-K-G-T-K-T-  
124 N-W, I<sup>133</sup>-M-H-E-Y-R, and Y<sup>160</sup>-K-K-Q bind to the backbone of the DNA molecule and provide  
125 affinity for DNA binding activity <sup>17</sup>. In the present analysis of 160 plant species, the identification  
126 of the conserved consensus sequences G-Y-W-K-A/T-T-G-x-D-x<sub>1-2</sub>-I/V, G-x-K-K-x-L-V-F-Y,  
127 and T-x-W-x-M-H-E-Y is in agreement with Welner et al (2012); suggesting that NAC TFs  
128 contain conserved consensus sequences for specific DNA recognition and increasing the affinity  
129 for DNA binding.

130 Hao et al., (2010) reported that the D subunit of NAC TFs contain a hydrophobic L-V-F-Y  
131 amino acid motif that suppresses WRKY, Dof, and APETALA2 transcriptional regulators. This  
132 suggests that NAC TFs may also function as a negative regulator of transcription <sup>10</sup>. Our  
133 sequence alignment, however, revealed that NAC TF family proteins in many different and  
134 diverse plant species possess a conserved hydrophobic L-V-F-Y motif. As reported by Hao et al.,  
135 (2010), all of the NAC TFs have the potential to suppress the transcriptional activity of WRKY,  
136 Dof, and APETALA 2/dehydration responsive element TFs; however, it is highly unlikely that an  
137 organism could regulate transcriptional events in a specific and sustained manner if NAC will  
138 conduct transcriptional repression.

139 The molecular weight of NAC TFs ranged from 346.46 kilodaltons (kDa) (*Trifolium*  
140 *pratense*\_Tp57577\_TGAC\_v2) to 2.94 kDa (*Fragaria* x  
141 *ananassa*\_FANhyb\_icon00034378\_a.1.g00001.1) (Figure 1). Among the studied NAC TFs, only  
142 10 NAC proteins have a molecular weight (MW) more than 200 kDa and approximately 99 are  
143 between 100 to 200 kDa. The MW of the majority of the NAC proteins range between 40 to 55  
144 kDa (Figure 1). The Isoelectric point (pI) of the NAC proteins ranged from 11.47  
145 (Brast01G304500.1.p, (*Brachypodium stacei*) to 3.60 (ObartAA03S\_FGP19036, *Oryza barthii*).  
146 The majority of the NAC TFs fell within a pI range of 5-8 (Figure 2). Among the 18774 analysed  
147 NAC TFs, the pI of 99 of them were ≥ 10. Approximately 69.28% of the NAC TFs had a pI that  
148 was in an acidic range, whereas the remaining 30.72% had a pI within in a basic range. A protein  
149 with a pH below the pI carries a net positive charge, whereas a protein with a pH above the pI  
150 carries a net negative charge. The pI of a protein determines its transport, solubility, and sub-  
151 cellular localization <sup>18-20</sup>. Biomembranes, such as those surrounding the nucleus, are negatively  
152 charged; as a result, positively charged (acidic pI) NAC TFs are readily attracted to the nuclear  
153 membrane and subsequently transported into the nucleus to function in transcriptional regulation.  
154 There are, however, approximately 30.72% NAC TFs that possess a basic Pi; suggesting that they  
155 are localized in the cytosol or plasma membrane of the cell. The major role of TFs is to bind to  
156 specific DNA sequences to regulate transcription. The majority of proteins have either an acidic or  
157 basic pI and those with a neutral pI close to 7.4 are few because proteins tend to be insoluble,  
158 unreactive, and unstable at a pH close to its pI. This is the main reason why among the 18774  
159 NAC TFs analysed, only two (XP\_010925972.1, *Elaeis guineensis*; Lus10008200, *Linum*  
160 *usitatissimum*) had a pI 7.4. The existence of NAC proteins with a pI above 10 led us to speculate  
161 whether these TFs function while attached to a transmembrane domain. Therefore, additional

162 analyses were conducted to determine if NAC TFs also have the potential to bind to the  
163 transmembrane domain or if the NAC TFs with a basic pI remain within the cytosol.

#### 164 ***NAC TFs are membrane bound***

165 Transcription factors regulate diverse cellular events at transcriptional, translational, and  
166 posttranslational levels. They are also involved in nuclear transport and posttranslational  
167 modifications. In several cases, TFs are synthesized but remain inactive in the cytoplasm and are  
168 only induced into activity through non-covalent interactions<sup>21,22</sup>. TFs are able to remain inactive  
169 through their physical association with intracellular membranes and are released by proteolytic  
170 cleavage. NAC TFs are a family of proteins whose numbers are in the hundreds in the majority of  
171 plant species. The fact that NAC TFs are such a large protein family, it is not surprising that NAC  
172 TFs have evolved diverse functional roles. Therefore, it is plausible that NAC TFs may be  
173 associated with sub-cellular organelle other than the nucleus to fulfil their diverse functional roles.  
174 It is essential, however, to confirm if NAC TFs contain signalling sequences for transmembrane  
175 localization. Therefore, we analysed the NAC gene sequences to determine if the signalling  
176 sequences present in NAC TFs possess a transmembrane domain.

177 Results indicated that at least 2190 (8.57%) NAC TFs possess a transmembrane domain.  
178 Transmembrane domains were found at both the N- and C-terminal ends of NAC proteins. In the  
179 majority of the cases, however, the transmembrane domain was located towards the C-terminal  
180 end. Seo et al., (2008) indicated the presence of a transmembrane domain in TFs and suggested  
181 that transmembrane domain functions through two proteolytic mechanisms, commonly known as  
182 regulated ubiquitin/proteasome-dependent (RUP) and regulated intramembrane proteolysis (RIP)  
183<sup>23,24</sup>. The bZIP plant TF is present as an integral membrane protein associated with stress response  
184 in the endoplasmic reticulum (ER)<sup>25-28</sup>. Studies suggest that the majority of membrane bound TFs  
185 are associated with the ER and a membrane bound TF was also found to be involved in cell  
186 division<sup>29,30</sup>. At least 10% of the TFs in *Arabidopsis thaliana* have been reported to be  
187 transmembrane bound<sup>30</sup>. The collective evidence clearly indicates that membrane-mediated  
188 transcriptional regulation is a common stress response and that NAC TFs play a vital role in stress  
189 resistance in the ER. Therefore, these membrane-bound NAC TFs can be of great importance for  
190 the manipulation of stress resistance using biotechnology.

#### 191 ***NAC TF contain monopartite, bipartite, non-canonical, and nuclear export signal sequences***

192 The import of NAC TFs into the nucleus is mediated by nuclear membrane-bound importins and  
193 exportins that form a ternary complex consisting of importin  $\alpha$ , importin  $\beta$ 1, and a cargo molecule.  
194 Importin  $\alpha$  serve as an adaptor molecule of importin  $\beta$ 1 and recognises the nuclear localization  
195 signal (NLS) of the cargo protein needing to be imported. Importin  $\beta$ 1 and  $\beta$ 2, however, also  
196 recognize the NLS directly and bind to the cargo protein. Although the NLS of TFs have been  
197 widely studied in the animal kingdom, their study in plants has been more restricted. Therefore,  
198 the NLS of NAC TFs was examined in the current study. Results indicate that NAC TFs contain  
199 diverse NLS. The NLS were found in the N- and C-terminal regions of NAC TF proteins. Some  
200 NAC TFs were found to contain only one NLS whereas other contain multiple NLS. At least 3579  
201 of the total NAC TFs analysed were found to contain either one or multiple NLS. More  
202 specifically, 2604 NAC TFs were found to possess only one NLS at the N-terminal end of the

203 NAC protein, whereas 975 were found to possess two NLS, 254 possess three NLS, and 48 were  
204 possess four NLS. The NLS were located towards the N-terminal end in the majority of NAC  
205 proteins.

206 NLS motifs are rich in positively charged amino acids and bind to importin  $\alpha$  to be  
207 imported into the nucleus. The NLS motifs are classified as monopartite or bipartite. A  
208 monopartite NLS contains a single cluster of positively charged amino acids and are grouped into  
209 two subclasses, class-I and class-II. Class-I possesses four consecutive positively charged amino  
210 acids and class-II contains three positively charged amino acids, represented by K(K/R)-x-K/R;  
211 where x represents any amino acid that is present after two basic amino acids. Bipartite NLS  
212 motifs contain two clusters of positively charged amino acids separated by a 10-12 amino acid  
213 linker sequence. Bipartite NLS motifs are characterised by the consensus sequence K-R-P-A-A-T-  
214 K-K-A-G-Q-A-K-K-K-K. In addition to monopartite and bipartite NLS motifs, importin  $\alpha$  also  
215 recognises non-canonical NLS motifs. Non-canonical NLS motifs are longer and considerably  
216 variable relative to monopartite and bipartite NLS motifs and are classified as class-III and class-  
217 IV NLS. Non-canonical NLS motifs are usually present in the C-terminal end and bind with  
218 importin  $\beta$ 2. Class-III and class-IV NLS motifs contain K-R-x(W/F/Y)-x<sub>2</sub>-A-F and (P/R)-x<sub>2</sub>-K-R-  
219 (K/R) consensus sequences, respectively. We identified at least 1702 unique NLS consensus  
220 sequences in the N-terminal region of NAC TFs. The monopartite class I NLS motifs were found  
221 to contain more than four consecutive basic amino acids with the number of their consecutive  
222 basic amino acids ranging from four to fourteen (K-K-K-K-K-K-K-K-K-K-K-K-K-K-K). The  
223 bipartite NLS motifs contain two clusters of consecutive basic amino acids separated by up to  
224 twenty-four linker amino acids (K-K-K-x<sub>3</sub>-R-x<sub>2</sub>-R-x<sub>4</sub>-K-x<sub>3</sub>-K-x<sub>3</sub>-K-x-K-x<sub>2</sub>-R-K-K).

225 The non-canonical NLS motifs contain at least six centrally-located, positively charged  
226 amino acids (K-x-R-R-R-P-R-R-x<sub>2</sub>-R-K) flanked by positively charged amino acids on both sides.  
227 Our analysis of the N-terminal NLS of NAC TFs, however, did not identify any NAC TFs  
228 containing this consensus sequence. Instead, several new variants of this consensus sequence were  
229 identified with multiple clusters of positively charged amino acids. These NLS were designated as  
230 multipartite NLS motifs. A few examples of the multipartite NLS include, K-K-K-K-x<sub>7</sub>-K-K-K-  
231 K-x<sub>7</sub>-K-K-K-K, K-K-K-K-x-K-x<sub>5</sub>-K-x-K-K-x<sub>7</sub>-K-K-K-K-x<sub>2</sub>-K-K-K, K-K-K-x<sub>2</sub>-K-K-x-K-x<sub>5</sub>-K-  
232 x<sub>4</sub>-K-K-K-R-x-K-R-K-x-K-x<sub>4</sub>-K-K-K-R-K-K, K-K-R-x-R-K-x<sub>2</sub>-K-x-K-x<sub>2</sub>-K-K-K-x-RK-x<sub>2</sub>-K-R-  
233 R-x<sub>2</sub>-K-K-K-x-R, K-K-R-x-R-K-x<sub>2</sub>-K-x-K-x<sub>2</sub>-K-K-R-x-R-K-x<sub>2</sub>-K-  
234 x<sub>2</sub>-K-x-K-x-R, K-x<sub>2</sub>-K-K-K-x<sub>3</sub>-K-K-K-K-K-x-K-x<sub>8</sub>-K-x<sub>9</sub>-K-x<sub>2</sub>-K-K-R-x<sub>2</sub>-K-K-K-K-x-K, K-x<sub>2</sub>-K-  
235 K-K-x<sub>3</sub>-K-x-K-K-K-x-K-K-K-x<sub>2</sub>-K-K-K-x-K, R-K-R-x-R-x-R-K-K-x<sub>2</sub>-K-x-K-K-K-R-x<sub>2</sub>-K-x<sub>2</sub>-  
236 KK-x<sub>2</sub>-R-R-K-x<sub>2</sub>-K, and R-K-R-x-R-x-R-x<sub>2</sub>-K-x-K-K-K-R-x<sub>2</sub>-K-x<sub>4</sub>-K-R-x<sub>2</sub>-R-R-K-x-K-x<sub>2</sub>-R.  
237 Much of the diversity of NLS motifs is associated with the sequence of the variable linker amino  
238 acids. In our analysis, we removed the linker amino acid sequences, represented as x, to obtain a  
239 more concise picture of NLS diversity. Removing the linker amino acids present in monopartite,  
240 bipartite, and multipartite NLS motifs resulted in the identification of 97 different NLS consensus  
241 sequences in the N-terminal region of NAC TFs. The unique NLS signal sequences were R-K-R-  
242 R-K, K-K-K, K-R-K, K-K-R, K-R-R, R-R-R, R-K-K, R-K-R, K-K-K-K, R-K-R-K, R-R-K, R-R-  
243 R-R, K-K-R-K, K-K-R-K-R, K-R-K-R, R-K-R-R-R, R-K-R-R, K-K-K-K-K, R-R-K-R, K-R-K-R-  
244 R-K, R-R-K-K, R-R-R-K, K-R-R-K, K-K-R-R, R-K-R-K-R, R-R-R-R-R, K-R-K-K, K-R-R-R, K-  
245 R-K-R-R-R, K-K-K-R, R-K-K-K, K-R-K-K-K, K-R-K-R-K, R-K-K-R, K-R-R-R-R, R-R-K-R-R-

246 K, K-K-K-K-R, K-K-K-R-K, K-K-R-K-K, K-K-K-K-K-K, R-K-K-R-K, R-K-R-K-K, R-K-K-K-  
247 K, R-K-R-K-R-K, R-R-K-K-K, R-R-K-R-R-R, R-R-R-R-K, K-K-K-K-K-K-K, K-K-K-K-K-K-K-  
248 K, K-K-K-K-R-R, K-K-R-R-R, K-K-R-R-R, R-R-K-R-K-R, R-R-R-K-K-K, R-R-R-R-R-R, R-R-  
249 R-R-R-R-K, K-K-K-K-K-R, K-K-K-K-K-R-K, K-K-K-R-K-K, K-K-K-R-R-R-R-R, K-R-K-K-K-  
250 K, K-R-K-R-R, K-R-R-K-R, R-K-K-K-K-R, R-K-R-K-K-K, R-K-R-R-K-R-K, R-R-K-K-K-K, R-  
251 R-R-K-K, R-R-R-K-R, R-R-R-R-K-K, R-R-R-R-R-K, K-K-K-K-K-K-K-K, K-K-K-K-K-K-K-K-  
252 K-K-K-K-K-K, K-K-K-K-K-K-K-K-K-K-K-K-K-K-K, K-K-K-K-K-R-R, K-K-K-K-R-K-R, K-  
253 K-K-R-K-R, K-K-K-R-R-R-R, K-K-K-R-R-R-R-R-R, K-K-R-R-R-R-R-R-R-R, K-R-K-K-R, K-  
254 R-K-R-K-R-K-K, K-R-R-K-K, R-K-K-K-K-K-R, R-K-K-R-K-K-R, R-K-K-R-K-R, R-K-R-K-R-  
255 R, R-K-R-K-R-R-K, R-K-R-R-K, R-K-R-R-K-R, R-R-K-K-R, R-R-K-K-R-K, R-R-K-R-K, R-R-  
256 R-K-R-R, R-R-R-R-K-K-K, R-R-R-R-K-R, R-R-R-R-R-R-R, and R-R-R-R-R-R-R-R. The R-K-  
257 R-R-K consensus sequence was found to be present 347 times, K-K-K 297 times, K-R-K 185  
258 times, K-K-R 165 times, K-R-R 153 times, R-R-R 96 times, R-K-K 95 times, R-K-R 83 times, K-  
259 K-K-K 75 times, R-R-K 74 times, R-R-R-R 58 times, K-K-R-K 49 times, K-K-R-K-R 49 times,  
260 and K-R-K-R 40 times. At least 27 NLS amino acid consensus sequences were only found once  
261 among the 160 studied species.

262 The C-terminal end of NAC TF proteins also contain monopartite, bipartite, and  
263 multipartite NLS motifs. The multipartite NLS motifs found in the C-terminal end of NAC  
264 proteins were R-K-R-x-R-x-R-K-K-x<sub>4</sub>-K-x-K-K-K-R-x<sub>3</sub>-K-x<sub>3</sub>-K-K-x<sub>3</sub>-R-R-K-x<sub>2</sub>-K, R-R-R-x<sub>4</sub>-K-  
265 K-x<sub>6</sub>-R-x<sub>2</sub>-R-x<sub>2</sub>-R-R-x<sub>4</sub>-R-R-R-x<sub>6</sub>-R-x<sub>2</sub>-R-R-x<sub>9</sub>-R-R-R-R-R-R-x<sub>2</sub>-R-R, K-K-K-x<sub>4</sub>-K-K-x-K-x<sub>5</sub>-  
266 K-x<sub>4</sub>-K-K-K-R-x-K-R-K-x-K-x<sub>4</sub>-K-K-K-R-K-K, K-K-R-x<sub>4</sub>-K-x<sub>2</sub>-K-x-K-x<sub>2</sub>-K-K-R-x-R-K-x<sub>4</sub>-K-  
267 x<sub>2</sub>-K-x-K-K-R-x-R-K-x<sub>4</sub>-K-x<sub>2</sub>-K-x-K-x-R, K-K-R-x-R-K-x<sub>2</sub>-K-x-K-x<sub>2</sub>-K-K-K-x-R-K-x<sub>2</sub>-K-R-R-  
268 x<sub>2</sub>-K-K-K-x-R, K-K-R-x-R-K-x<sub>2</sub>-K-x-K-x<sub>2</sub>-K-K-R-x-R-K-x<sub>2</sub>-K-x-K-x<sub>2</sub>-K-K-R, R-K-R-x-R-x<sub>3</sub>-K-  
269 K-R-R-x<sub>2</sub>-K-x<sub>9</sub>-K-x<sub>4</sub>-R-x-K-x<sub>2</sub>-R-x-R-R-x<sub>5</sub>-K-K-R, R-K-R-x-R-x-R-x<sub>5</sub>-K-x-K-K-K-R-x<sub>3</sub>-K-x<sub>4</sub>-K-  
270 R-x<sub>2</sub>-R-R-K, R-R-x-R-R-R-x-R-R-x<sub>8</sub>-R-x<sub>6</sub>-R-R-x<sub>5</sub>-R-R-R-x-R-x<sub>5</sub>-R-x<sub>8</sub>-R-R-R-R, R-R-x-R-R-x-  
271 R-x-R-R-R-x<sub>9</sub>-R-x<sub>2</sub>-R-R-K-R-K-x-R-x<sub>4</sub>-R-R-R-R-R-R-x<sub>4</sub>-R-K, R-x-R-R-R-R-x<sub>6</sub>-R-x<sub>11</sub>-R-x<sub>8</sub>-R-R-  
272 x<sub>3</sub>-R-R-R-x<sub>2</sub>-R-R-x-R-x-R-x<sub>6</sub>-R-R-R-R-R-x<sub>4</sub>-R-R-x<sub>2</sub>-R, R-x-R-R-x<sub>3</sub>-K-R-R-R-x<sub>2</sub>-R-x-R-R-x-R-x-  
273 R-x<sub>7</sub>-R-x<sub>3</sub>-R-R-R-x<sub>7</sub>-R-x<sub>2</sub>-R-R-R-R, R-x-R-x-R-R-R-x<sub>3</sub>-R-R-R-x<sub>3</sub>-R-x-R-x<sub>2</sub>-R-x<sub>4</sub>-R-R-R-x<sub>5</sub>-R-K-  
274 x-R-x<sub>3</sub>-R-R-x<sub>13</sub>-R-R-x-K-x<sub>5</sub>-R-R-x<sub>6</sub>-K-R-R, and others. Removal of the linker amino acids  
275 present in between the consecutive basic amino acids, resulted in the identification of 94 unique  
276 consensus sequences. These include K-K-K, K-K-R, R-R-R, K-R-K, K-K-R-K-R, R-K-K, K-K-R-  
277 K, R-K-R-K, K-K-K-K, K-R-K-R, K-R-R, R-K-R, R-R-K, R-R-R-R, K-R-K-K, R-K-R-R-K, and  
278 others. The NLS consensus sequence K-K-K was identified 144 times, K-K-R 83 times, R-R-R 65  
279 times, K-R-K 60 times, K-K-R-K-R 58 times, R-K-K 47 times, K-K-R-K 45 times, R-K-R-K 40  
280 times, K-K-K-K 39 times, K-R-K-R 37 times, K-R-R 36 times, R-K-R 35 times, R-R-K 31 times,  
281 R-R-R-R 24 times, K-R-K-K 17 times, and R-K-R-R-K 17 times. A comparison of the 97 NLS  
282 consensus sequence present in N-terminal region with the 94 NLS sequences present in the C-  
283 terminal region indicated that 84 NLS consensus sequences were shared between the N-terminal  
284 and C-terminal regions. This indicates that there is a close relationship between the NLS  
285 sequences in these two regions. An analysis of the unique NLS consensus sequence in the N-and  
286 C-terminal regions indicated that 13 NLS consensus sequences were unique to the N-terminal  
287 region, namely R-K-R-R-K, R-R-R-R-K, K-K-K-K-R-R, K-R-K-K-K-K, R-R-K-K-K-K, K-K-K-  
288 K-K-R-R, K-K-K-R-K-R, R-K-K-R-K-K-R, R-K-R-K-R-R, R-K-R-R-K-R, R-R-K-K-R-K, R-R-

289 R-K-R-R, and R-R-R-R-K-R. Similarly, nine NLS consensus sequences were unique to the C-  
290 terminal region, namely K-K-R-R-K, K-K-K-K-R-K, R-R-K-K-K-R-R-R-R-R-R-R, K-K-R-K-R-  
291 K, K-R-R-R-K, R-K-K-R-K-K, R-K-K-R-R, R-R-K-R-R-R-K, and R-R-R-R. Up to six classes of  
292 NLS have been reported to be associated with importin  $\alpha$  subunit<sup>31</sup>. To the best of our knowledge,  
293 this is the first report describing such a high level of diversity and dynamism in the NLS  
294 consensus sequences of NAC TFs and plant transcription factors in general. This is also the first  
295 report of the presence of unique NLSs in the N- and C-terminal regions of NAC TFs.

296 Several nuclear-associated proteins contain NLS, as well as nuclear export signals (NESs).  
297 Proteins that perform their function within the nucleus need to be exported out of the nucleus and  
298 into the cytoplasm to undergo proteasomal degradation. Therefore, a NES is required in addition  
299 to an NLS. A Ran-GTP complex binds directly to an NES and mediates the nuclear export process  
300 of cargo molecules<sup>32</sup>. NES sequences contain a hydrophobic, conserved L-V-F-Y (substitute L-  
301 V/I-F-M) motif separated by variable linker amino acids at both ends<sup>33</sup>. The presence of an L-V-  
302 F-Y motif in all NAC proteins, suggests that all NAC proteins have the potential to be exported  
303 out of the nucleus. Hao et al. (2010), however, reported that the hydrophobic L-V-F-Y motif  
304 functions as a transcriptional repressor of WRKY, Dof, and APETALA TFs. If the L-V-F-Y motif  
305 acts as a transcriptional repressor, then the transcriptional activity of these TFs would be lost;  
306 resulting in an unstable genome. Therefore, we suggest that the L-V-F-Y motifs do not function as  
307 a transcriptional repressor but rather as a NES.

### 308 ***NAC TFs possess a complex interactome network***

309 The interacting partner of a protein can provide significant information about its potential function  
310 and an entire protein-protein interactome network can greatly assist in unravelling the signalling  
311 cascade of the proteins. Different cascades are interlinked in signalling systems and form intricate  
312 constellations that provide information about cell response and function. Thus, the interactome  
313 network of NAC TFs in *A. thaliana* were explored. The presence of a dynamic network was  
314 revealed and a diverse set of interacting protein partners of NAC TFs were identified (Figure 3,  
315 Table 2). Results indicated that NAC TFs interact with RNS1 (ribonuclease 1), ERD14 (early  
316 responsive to dehydration 14), VND1 (vascular related NAC domain 1), VND7, GAI (gibberellins  
317 inducible), ZF-HD1 (zinc finger homeodomain 1), TCP8 (Teosinte branched, Cycloidea, and  
318 Proliferating cell nuclear antigen factor 8), TCP20, CPL1 (C-terminal domain phosphatase-like1),  
319 RHA1A (ring H2 finger H1A), RHA2A, SHR (short root), PHB (phabulosa), PLT2 (plethora 2),  
320 MYB59, HB23 (homeobox 23), HB30, NAC1, NAC6, NAC19, NAC32, NAC41, NAC45,  
321 NAC50, NAC52, NAC76, NAC83, NAC97, NAC101, NAC105, IAA14 (auxin responsive protein  
322 indole3-acetic acid), HAI1 (protein phosphatase), ABI1 (ABA insensitive 1), RVE2 (reveille),  
323 PYL4 (PYR-like 4), BRM (brahma), HB52, RCD1 (radical-induced cell death 1), JMJ14 (jumonji  
324 14), TPL (TOPLESS), F2P16 (TOPLESS related), TOPLESS, RING/U-box, ZF-domain (zinc  
325 finger domain), SRO1 (similar to RCD 1), CUC2 (cup shaped cotyledon 2), PAS1 (pasticcino 1),  
326 TI1 (defensin like 1), TSPO (tryptophan rich sensory protein), TIP2.2 (TCV-interacting protein  
327 2.2), TIP3.1, T21F11.18 (TOPLESS related), LRR (leucine rich repeat), RPA2 (replicon protein  
328 A2), and VR-NAC (Table 2). The interaction of NAC TF proteins with the diverse number of  
329 listed proteins has been experimentally validated in *A. thaliana*. The interactome network includes  
330 stress responsive proteins, other transcription factors, hormonal signalling proteins, protein



331 phosphatases, and defense related proteins. In addition to experimentally-validated interacting  
332 proteins, bioinformatic mining indicated that NAC TFs also interact with several other proteins  
333 (Table 2). Some of the identified interacting proteins were MYB, NAC, NTL (NTL2-like),  
334 UBC30 (ubiquitin conjugating enzyme 30), ATM (Ataxia-Telangiectasia mutated), ATR  
335 (serine/threonine kinase ATR), KNAT (knox tail), AOX1A (alternative oxidase 1A), ASG2  
336 (altered seed germination 2), NYE (nonyellowing), CPL, TMO6 (target of monopteros 6),  
337 RHA2A (ring H2-finger A2A), XCP (xylem cysteine peptidase), DBP (downstream auxin  
338 binding), WAK5 (wall associated kinase 5), RCD, CYP71A25 (cytochrome P71A25), Stay green,  
339 ERF (ethylene responsive transcription factor), PPR (pentatricopeptide), WOX (Wuschel related  
340 homeobox), PPD6 (psbP-domain protein 6), MFDX (mitochondrial ferredoxin), LEA (late  
341 embryogenesis abundant), IRX (irregular xylem), CESA4 (cellulose synthase A4), SCRL20  
342 (SCR-like 20), PIP1-5 (aquaporin), PUP4 (purine permease 4), XERO1 (dehydrin xero 1), SWAP  
343 (suppression of white apricot), TIR-NBS, NBS-LRR, PAS, CHI (chitinase), MC5 (metacaspase  
344 5), XCP (xylem cysteine peptidase), RNS, LAC (laccase), TIR-NBS (toll/interleukin receptor-  
345 nucleotide binding site), NBS-LRR, DTA4 (downstream target 4), BAG6 (BCL-2 associated  
346 anthogene 6), and others as well (Table 2). Some NAC TFs are co-expressed with other proteins.  
347 These include DREB2A, XCP1, XCP2, ATM, ATR, MYB63, MYB69, MYB83, IRX1, AOX1A,  
348 RCD1, ASG2, ERD1, TMO6, DOF6, SHR, PLT2GRP20, CYP86C4, VND7, NAC6, NAC32,  
349 NAC97, NAC19, NAC102, HAI1, WRKY33, WRKY46, WRKY53 and others (Table 2). Some of  
350 the NAC TFs directly interact with the interacting partner while others form complexes and  
351 appear to play an indirect role. NAC TFs act as a negative regulator of ABA signalling, while  
352 they induce JA/ET-associated marker genes<sup>34</sup>.

353 The expression of several of NAC genes are either up- or down-regulated by auxin,  
354 ethylene, or ABA, suggesting that NAC TFs play a role in plant hormonal signalling<sup>35-37</sup>. One of  
355 the most challenging aspects of a protein-protein interactome network is that the interaction can  
356 vary depending upon the cell and its environment<sup>38</sup>. Therefore, it is necessary to investigate the  
357 dynamic interactions of proteins in different cells and environmental conditions to completely  
358 understand their interacting partner and the cellular function of the TF. NAC TFs regulate *ERD*  
359 and *NCED* (ABA biosynthesis) genes through a direct interaction with their promoters<sup>39,40</sup>. NAC  
360 TFs (ANAC019, ANAC055, and ANAC072) interact with ERD1 which encodes a Clp protease  
361 regulatory subunit<sup>41</sup>. The over expression of one of these three NAC TFs, however, did not  
362 induce the up-regulation of ERD1 because the induction of ERD1 depends on the co-expression  
363 of a zinc finger homeodomain TF, ZFHD1<sup>41</sup>. ANAC019 and ANAC055 interact with ABI  
364 (abscisic acid insensitive), and at least five MYB TFs can bind to the NAC TF promoter region  
365<sup>42,43</sup>. In this case, the NAC DNA binding domain mediates the interaction with RHA2A and  
366 ZFHD1<sup>43</sup>.

### 367 *NAC TFs encodes chimeric proteins and contain multiple binding sites*

368 NAC TFs are characterised by the presence of a DNA binding domain. Several NAC TFs,  
369 however, contain more than one NAC domain. Chimeric NAC TFs have also been identified. At  
370 least 45 variants of chimeric NAC TFs were identified in our analysis (Figure 4). Several of the  
371 NAC TFs were also found to possess as many as three or four NAC DNA binding domains.  
372 Furthermore, the NAC domains were found to be associated with PPR (pentatricopeptide), protein

373 kinase, PI3\_4\_kinase\_3, EF-hands (elongation factor), CRM, peptidase A1, WRKY, cytochrome  
374 B561, OFOF, FFO, Dna\_J2, ZF\_B, TIR, LRR, CS, F-box, IQ, PPC, ENT, ABC\_TM1F,  
375 RWP\_RK, PB1, PABC, ACT, INTEGRA, RESPO, JMJC, SAM, BRX, G\_TR\_2, RORP, CHCH,  
376 TPR, YJEF\_N, HTH, HOMEO, GH16, ANK\_REPEAT\_REGION, Peroxidase, LONGIN, V\_SNA,  
377 RECA\_2, KH\_TY, APAG, RRM, carrier, and a DCO domain. At least four NAC TFs from *A.*  
378 *thaliana*, ten from *B. napus*, four from *B. rapa*, two from *M. domestica*, four from *P. virgatum*, 17  
379 from *C. sativa*, eight from *D. oligosanthos*, eight from *E. tef*, and five from *L. perrieri* were found  
380 to possess 2 NAC domains (Supplementary Table 1). NAC TFs in several other species were also  
381 found to contain two NAC domains (Supplementary Table1). When two NAC domains were  
382 present, both domains were located towards the N-terminal end. NAC TFs of at least three  
383 species, *O. rufipogon*, *B. stacei*, and *Camelina sativa* were found to possess three NAC domains  
384 whereas the NAC TFs in *A. lyrata* (gene id: 338342), *C. sativa* (Csa16g052260.1), and *E. tef*  
385 (462951506) were found to possess four NAC domains (Figure 4).

386 Other chimeric domains were also identified in different regions of the NAC protein. PPR  
387 domains were found in both the N-terminal or C-terminal region, a protein kinase domain was  
388 found upstream to the NAC domain, and a NAC domain was found to be adjacent to a protein  
389 kinase and EF-hand domain. Additionally, a protein kinase domain was found to be followed by  
390 either a NAC and a CRM domain, a NAC domain was followed by a peptidase\_A1 domain, a  
391 NAC domain was followed by the presence of a WRKY domain, a cytochrome\_B561 domain was  
392 followed by either a NAC domain and a CRM domain, a DFDL and a FFD domain were followed  
393 by a cytochrome B and NAC domain, a DNAJ\_2 domain was followed by a NAC domain, a  
394 DNAJ\_2 domain was followed by a NAC and ZF\_B domain, a NAC domain was followed by  
395 TIR, LRR and CS domains, a NAC domain was followed by a TIR domain, an F-box domain was  
396 followed by a NAC domain, an IQ domain was followed by a NAC domain, a NAC domain was  
397 followed by a ZF\_B domain, an EF-hand domain was followed by a NAC domain, a NAC domain  
398 was followed by a PPC domain, an ENT domain was followed by a NAC domain, a NAC domain  
399 was followed by an ABC\_TM1F, a NAC domain was followed by CRM domain, a NAC domain  
400 was followed by a RWP\_RK and a PB1 domain, a NAC domain was followed by three ACT  
401 domains, a NAC domain was followed by a PABC domain, a NAC domain was followed by an  
402 INTEGRA domain, a RESPO domain was followed by a NAC domain, a NAC domain was  
403 followed by a JMJC and a JMJC domain, a SAM domain was followed by a NAC domain, a BRX  
404 domain was followed by a NAC domain, a NAC domain was followed by ZF\_B, NAC and ZF\_B  
405 domains, an F-box and protein kinase domain was followed by a NAC domain, a NAC domain  
406 was followed by a G\_TR\_2 domain, an RDRP domain was followed by a NAC domain, a NAC  
407 domain was followed by a CHCH domain, a TPR domain followed by a NAC domain, an F-box  
408 domain followed by NAC and F-box domains, a NAC domain was followed by a YJEF\_N  
409 domain, a NAC domain was followed by a HTH domain, a homeobox domain was followed by a  
410 NAC domain, a NAC domain was followed by three GH16\_2 domains, an ANK repeat region  
411 was followed by a NAC domain, a NAC domain was followed by a peroxidase domain, a NAC  
412 domain was followed by a LONGIN and V\_SNA domain, a NAC domain was followed by  
413 RECA\_2 and RECA\_3 domains, a KH domain was followed by a NAC domain, a NAC domain  
414 was followed by a RAB domain, a JMJC domain was followed by a NAC domain, a NAC domain  
415 was followed by an APAG domain, an RRM domain was followed by a NAC domain, a carrier

416 domain was followed by a NAC domain, and a NAC domain was followed by DCO domain  
417 (Figure 4).

418 The presence of chimeric domains within NAC TFs is of particular interest, especially for  
419 understanding why they are there and how they impact the function of a specific NAC TF. The  
420 most common domains, such as PPR, TIR, WRKY, protein kinase, ZF\_B, EF-hands, cytochrome  
421 B, DNAJ, F-box, peroxidase, and GH16 are involved in diverse cellular processes, including  
422 transcriptional regulation of plant development and stress response<sup>44-52</sup>. The association of a TIR  
423 domain with an NBS-LRR domain is an example of the association of TF domains with other  
424 domains to form chimeric proteins<sup>53</sup>. The presence of different domains with the NAC domain  
425 could potentially enable the NAC domain to assist in the function of the associated domains and  
426 vice versa. For example, NAC TFs could have the potential to regulate peroxidase by possessing a  
427 peroxidase domain within the NAC TF, instead of regulating it separately with another TF. The  
428 presence of multiple domains can enable the co-regulation of diverse functional sites within the  
429 NAC TFs. The presence of chimeric TFs has been recently reported in WRKY TFs as well<sup>54,55</sup>.  
430 Therefore, the presence of chimeric domains in NAC TFs can impart a significant dynamic aspect  
431 to the ability of NAC TFs to regulate gene expression.

432 In addition to the presence of multiple chimeric domains, NAC TFs were also found to contain  
433 diverse active/binding motifs for several other proteins. It is possible that NAC TFs may play a  
434 dual role as a transcription factor and as an enzyme. At least 404 NAC TFs were found to possess  
435 other functional motifs comprising 101 unique functional sequences (Supplementary Table 2). In  
436 addition to NAC domains, the other function sequences included a Fe-2S ferredoxin-type iron-  
437 sulfur binding region signature, 2-oxo acid dehydrogenase acyltransferase component lipoyl  
438 binding site, 4Fe-4S ferredoxin-type iron-sulfur binding domain profile, 7,8-dihydro-6-  
439 hydroxymethylepterin-pyrophosphokinase signature (30), ABC transporter family signature (2),  
440 adenosine and AMP deaminase signature (2), adipokinetic hormone family signature, aldehyde  
441 dehydrogenase cysteine active site (4), aldehyde dehydrogenase glutamic acid active site (28),  
442 aldo/keto reductase family putative active site signature (4), alkaline phosphatase active site (5),  
443 aminoacyl-transfer RNA synthetase class-I signature, aminotransferase class-II pyridoxal-  
444 phosphate attachment site (15), antenna complexes beta subunit signature (2),  
445 ArgE/dapE/ACY1/CPG2/yscS family signature 1 (2), aspartate and glutamate racemases signature  
446 1 (3), aspartokinase signature (2), ATP binding site and proton acceptor, ATP synthase alpha and  
447 beta subunit signature (19), ATP dependent DNA ligase AMP-binding site (2), bacterial  
448 regulatory proteins araC family signature, beta-ketoacyl synthases active site (2), C-5 cytosine-  
449 specific DNA methylases active site, cadherin domain signature, carbamoyl-phosphate synthase  
450 subdomain signature 2, cysteine protease inhibitor signature (19), cytochrome p450 cysteine  
451 heme-iron ligand signature (7), endopeptidase Clp serine active site (3), eukaryotic and viral  
452 aspartyl proteases active site (10), FGGY family of carbohydrate kinase signature 2, fumarate  
453 lyases signature, GHMP kinases putative ATP-binding domain, glucoamylase active site region  
454 signature, glyceraldehyde 3-phosphate dehydrogenase active site, glycoprotease family signature,  
455 glycohydrolase family 5 signature, glycosyl hydrolase family 9 active site signature 2, heavy  
456 metal associated domain, hemopexin domain signature (2), histone H4 signature (4), HMG-I and  
457 HMG-Y DNA binding domain (A+T hook) (9), immunoglobulins and major histocompatibility  
458 complex protein signature (4), inorganic pyrophosphate signature (13), iron-containing alcohol

459 dehydrogenase signature 1, legume lectins beta-chain signature (15), lipocalin signature (23),  
460 mannitol dehydrogenase signature, N-6 adenine-specific DNA methylases signature (7), neutral  
461 zinc metallopeptidase, zinc binding region signature, Nt-DnaJ domain signature (2), peroxidase  
462 active site signature, pfkB family of carbohydrate kinases signature 1 and 2 (4), phospholipase A2  
463 histidine active site (5), phosphopantetheine attachment site (17), polygalacturonase active site  
464 (2), polyprenyl synthases signature, PPM-type phosphatase domain signature, prokaryotic  
465 membrane lipoprotein lipid attachment site, putative AMP binding domain signature, regulator of  
466 chromosome condensation (RCC1) signature 2 (2), ribosomal protein L24e signature (7),  
467 ribosome binding factor A signature, rubredoxin signature (2), serine protease, subtilase family  
468 aspartic acid active site (21), serine protease, trypsin family, serine active site, serine/threonine  
469 protein kinase active-site signature (3), sigma-54 interaction domain ATP-binding site A  
470 signature, signal peptidase I serine active site (3), signal peptidase I signature 3 (4), soybean  
471 trypsin inhibitor (Kunitz) protease inhibitor family signature, SRP54-type proteins GTP-binding  
472 domain signature, sugar transport proteins signature 2, synaptobrevin signature,  
473 syntaxin/epimorphin family signature, TonB-dependent receptor proteins signature 1 (7),  
474 translationally controlled tumor protein (TCTP) domain signature 2, Trp-Asp (WD) repeats  
475 signature (12), tubulin subunit alpha, beta, and gamma signature (2), tubulin-beta mRNA  
476 autoregulation signal (2), zinc carboxypeptidases, zinc binding region 2 signature (11), zinc finger  
477 BED-type profile, zinc finger C2H2 type domain signature, and a zinc-containing alcohol  
478 dehydrogenase signature (2) (Supplementary Table 2). This is the first study to report the presence  
479 of such a diverse number of functional sites and signature motifs in NAC TFs. Although the  
480 majority of the functional domains are associated with a specific function in plants, the presence  
481 of a histocompatibility complex and a translationally controlled tumor protein (TCTP) sequence  
482 are of particular interest. These proteins are specifically found in animal systems and the  
483 histocompatibility complex is the major contributing factor regulating the binding of antigens.  
484 More specifically, TCTP is a highly conserved protein that is involved in microtubule  
485 stabilization, calcium binding, and apoptosis and is associated with the early growth phase of  
486 tumors<sup>56</sup>. The presence of MHC and TCTP in association with NAC domains suggests that this  
487 combination may be playing a crucial role in the plant immune system and in uncontrolled cell  
488 growth. The presence of diverse functional sites in NAC TFs indicates that NAC TFs are involved  
489 in diverse cellular functions and metabolic pathways. This statement is supported by the large  
490 number of NAC TFs that are present in plant genomes.

#### 491 ***NAC TFs are involved in diverse cellular processes***

492 NAC TFs are known to possess diverse chimeric domains, as a result, it is more than likely that  
493 NAC TFs are also involved in the regulation of diverse cellular pathways and cellular processes.  
494 To help substantiate this premise, the interactome associated with NAC TFs in *A. thaliana* was  
495 analysed. Results indicated that NAC TFs are potentially involved in a least 289 different cellular  
496 processes and pathways (Supplementary Table 3). The majority are related to cell, tissue, and  
497 organ (root, stem, meristem) development, as well as signalling processes. Several NAC TFs also  
498 appear to be associated with phytohormone signalling, including auxin, gibberellin, jasmonic acid,  
499 and salicylic acid signalling pathways. NAC TFs were also found to be associated with pathways  
500 involved in the response to bacterial, fungal, UV, heat and other biotic and abiotic stresses  
501 (Supplementary Table 3). At least 202 genes in the NAC TF interactome network were found to

502 be associated with pathways related to the nucleus, 239 were associated with intracellular  
503 membranes, and 241 were associated with intracellular organelles, 20 with the endoplasmic  
504 reticulum, and 3 with the nuclear matrix. If the association is designated based on the description  
505 of a pathway, 127 genes were found to be associated with transcription factor activity and  
506 sequence-specific DNA binding, 143 with DNA binding, 146 with nucleic acid binding, 220 with  
507 organic cyclic compound binding, 220 with heterocyclic compound binding, 65 with ATP  
508 binding, 49 with macromolecular complex binding, 48 with chromatin binding, 35 with ADP  
509 binding, 25 with sequence-specific DNA binding, 18 with transcription regulatory region binding,  
510 8 with structural constituents of the cell wall, 11 with auxin transport activity, 2 with LRR  
511 binding, and 2 with bHLH transcription factor binding. These data clearly indicate that NAC TFs  
512 are involved in diverse cellular processes. The identification of LRR protein in the pathway  
513 description of NAC TFs agrees with the presence of an LRR domain in a chimeric NAC domain  
514 of NAC TFs.

### 515 *NAC TFs are expressed in a spatiotemporal manner*

516 Patterns of NAC TF gene expression were analysed in leaf and root tissues of *A. thaliana*  
517 treated with ammonia, nitrate, or urea (Figure 5 and Figure 6). Among a total of 120 NAC TFs, 95,  
518 97, and 98 were differentially expressed in leaf tissue treated with ammonia, nitrate, or urea,  
519 respectively. Leaf tissues treated with ammonia, nitrate and urea exhibited 70.14, 117.11, and  
520 58.35 FPKM expression values for *AtNAC1* (AT1G01010.1), *AtNAC4* (AT1G02230.1), and  
521 *AtNAC1* (AT1G01010.1), respectively. At least 46 genes in leaves exhibited expression of more  
522 than one FPKM in response to ammonia, 54 in response to nitrate, and 44 in response to urea.  
523 *AtNAC1* was highly expressed in ammonia and urea treated leaves. At least 24, 26, and 25 NAC  
524 TFs did not exhibit any expression in leaf tissues treated with ammonia, nitrate, or urea.

525 Relative to leaf tissues, the expression of NAC TFs in root tissues was more dynamic. Root  
526 tissue treated with urea exhibited the highest expression of NAC TFs relative to leaves treated  
527 with ammonia or nitrate (Figure 6). The number of *AtNAC* TFs whose expression was one or more  
528 FPKM in response to ammonia, nitrate, or urea were 75, 71, and 70, respectively. *AtNAC8*  
529 (AT5G08790.1) was highly expressed in ammonia-treated roots, whereas, *AtNAC91*  
530 (AT5G24590.2) was highly expressed in nitrate- and urea-treated roots. Urea, ammonia and  
531 nitrate (UAN) commonly serve as a source of nitrogen (N) for plants. Analysis of the levels of  
532 gene expression indicate that ammonia and nitrate modulate the expression of NAC TFs more than  
533 urea. A study utilizing *Pinus taeda* revealed that fertilization with ammonium, nitrate, or urea  
534 produces different effects on growth and drought tolerance<sup>57</sup>. Results of the current analysis  
535 indicate that *AtNAC8* and *AtNAC91* are the major NAC TFs involved in nitrogen assimilation  
536 during plant growth.

### 537 *Codon usage in NAC TF is dynamic*

538 Codon usage bias in NAC TFs of the examined species were studied. separately. Among 61 sense  
539 codons, only 14 were found in the all species. These included AAG (K), ACU (R), AGA (R),  
540 AGG (R), UCU (S), AUC (I), AUG (M), CAA (Q), CCU (P), GAA (E), GCU (A), GGA (G),  
541 UGG (O), and UUC (F) (Table 3). The most abundant codon was UCU (S), which was found 30  
542 times in in *Humulus lupulus* NAC TFs (Table 3). The codons CGA (R), CGC (R), CGG (R), CGU

543 (R) were absent in 127 of the 160 examined species. ACG (T), UCG (S), CAG (Q), CAC (H),  
544 CCA (P), CCC (P), CCG (P), and GCG (A) were absent in 126 of the examined species. The  
545 highest relative synonymous codon usage bias (RSCU) was found to be 1.35, 1.23, 1.29 for the  
546 codon AAA (K) in *Ocimum tenuifolium*, *Picea sitchensis*, and *Ipomea trifida*. Synonymous codon-  
547 usage was not observed in NAC TFs. Relative codon usage is determined by dividing the ratio of  
548 observed frequency of codons by the expected frequency, provided that all of the synonymous  
549 codons for the same amino acids are used equally. Relative Synonymous Codon Usage (RSCU),  
550 however, is not related to the usage of amino acids. An RSCU > 1 indicates the occurrence of  
551 codons more frequently than expected, while an RSCU < 1 indicates that the codon occurs less  
552 frequently than expected<sup>58,59</sup>. Non-synonymous substitution in organisms is subject to natural  
553 selection<sup>60,61</sup>. Genes with lower non-synonymous selection leads to functional diversity of a gene.  
554 The presence of a low level of nonsynonymous codon usage in NAC TFs indicates that they are  
555 functional and have evolved from paralogous ancestors.

### 556 ***Rate of transition of NAC TFs is higher than the rate of transversion***

557 Nucleotide mutation is an integral part of the evolution of a genome and leads to the acquisition of  
558 required traits and the elimination of detrimental traits from the genome. It is a regular process  
559 and hundreds of thousands of nucleotides have undergone addition or deletion events in the  
560 evolution of a genome. The alteration or conversion of a nucleotide occurs either through a  
561 transition or a transversion. A transition event involves the interchange of two-ring purines (A and  
562 G) or of one-ring pyrimidines (C and T). Transversion events the exchange of a purine for a  
563 pyrimidine or vice versa. The rate at which these two events occur is important to understanding  
564 of the evolution of a gene. Therefore, the rate of nucleotide substitution in NAC TFs was  
565 analysed. Results indicated that the rate of transition in NAC TFs is higher than the rate of  
566 transversion. The substitution of adenine with guanine was found to be highest in *Linum*  
567 *usitatissimum* (15.82), while the substitution of guanine to adenine was found to be the highest in  
568 *Lotus japonicas* (19.07). The lowest rate of substitution from adenine to guanine and vice versa  
569 was found in *Trifolium pratense* (9.73) and *Amborella trichopoda* (10.8), respectively (Table 4).  
570 The highest rate of substitution from thiamine to cytosine and vice versa was found in  
571 *Klebsormidium flaccidum* (7.19) and *Pseudotsuga menziesii* (11.59), respectively. The lowest rate  
572 of substitutions from thiamine to cytosine and vice versa was found in *Capsella grandiflora* (2.41)  
573 and *Cicer arietinum* (1.62), respectively (Table 4). These data make it evident that the rates of  
574 transition of purine (adenine and guanine) nucleotides are higher than the rates of pyrimidines.  
575 The highest rate of transversion from adenine to thiamine and vice versa was found in *Capsella*  
576 *grandiflora* (12.34 for adenine to thiamine and 9.91 for thiamine to adenine) (Table 4). The rate of  
577 substitution by transversion is slower relative to the rate of substitution by transition.

578 *Capsella grandiflora* is a close relative of *Arabidopsis thaliana* and is predicted to be the  
579 progenitor of *Capsella bursa-pastoris*. *Capsella grandiflora* is a self-pollinating plant and is used  
580 as a model organism in evolutionary studies and the change from self-incompatibility into self-  
581 compatibility. The genomic consequences of the evolution of selfing, however, is poorly  
582 understood. *Capsella rubella*, a close relative of *Capsella grandiflora*, that evolved self-  
583 compatibility 200,000 years ago<sup>62</sup> also exhibits a high rate of transversion from adenine to  
584 thiamine (11.19). Thus, the higher rate of transversion from adenine to thiamine in *Capsella*

585 *grandiflora* and *Capsella rubella* may be a possible factor in the evolution of self-pollination.  
586 Higher rates of transversion were also found in *Solanum pimpinellifolium* (11.4) and *Castanea*  
587 *mollissima* ((11.31) Chinese chestnut). *Solanum pimpinellifolium* is self-pollinating and exhibits  
588 high levels of stress tolerance<sup>63</sup>. *Castanea mollissima* has evolved over a period of time in  
589 coexistence with chestnut blight and is resistant to the pathogen. This indicates that higher rates of  
590 transversion from adenine to thiamine and vice versa are associated with self-pollination and  
591 stress tolerance in plants. The highest rate of substitution from guanine to cytosine and vice versa  
592 was found in *Arachis hypogaea* (11.07), and *Camelina sativa* (11.46), respectively (Table 4). The  
593 lowest rate of substitution from adenine to thiamine and vice versa was found in *Linum*  
594 *usitatissimum* (3.72) and *Klebsormidium flaccidum* (6.67), respectively. Notably, the highest rate  
595 of substitution from thiamine to cytosine was found in *Klebsormidium flaccidum* and the highest  
596 rate of substitution from adenine to guanine was found in *Linum usitatissimum*. This indicates that  
597 organisms which exhibit the highest rate of transition possess the lowest rate of transversion.

### 598 ***NAC TFs evolved from orthologous ancestors***

599 A phylogenetic tree of NAC TFs was constructed to understand their evolutionary relationships. A  
600 model selection was conducted before constructing the phylogenetic tree using the maximum  
601 likelihood statistical method. The phylogenetic tree revealed the presence of at least seven  
602 phylogenetic clustered orthologous (COGs) groups originating from a common, orthologous  
603 ancestor (Figure 7). Each phylogenetic cluster was further divided into two or more sub-groups.  
604 A phylogenetic tree of each individual species was subsequently constructed to examine  
605 duplication and loss events in NAC TFs. The phylogenetic tree of each species was independently  
606 reconciled with the collective species tree. This analysis indicated that NAC TFs in all of the  
607 species were duplicated and no NAC TFs were found to be lost. This suggest that NAC TFs  
608 evolved from common ancestors (orthology) and underwent numerous duplication events during  
609 speciation (paralogy), which gave rise to diverse gene functions in plant development and growth.  
610 We also checked for the presence of potential foreign or homologous sequences (xenologs) in  
611 NAC TFs. No primary xenologs, sibling donor xenologs, sibling recipient xenologs, incompatible  
612 xenologs, autoxenologs, or paraxenologs were identified in NAC TFs. Although the phylogenetic  
613 tree indicates the evolution NAC TFs from common ancestors, none of the NAC genes in the  
614 examined species were found to have been transferred from one species to another (Table 1).  
615 Previous studies of NAC TFs in six plant species also reported a high level of duplication and  
616 divergent evolution<sup>64</sup>. The expansion of TF families was associated with an increase in the  
617 structural complexity of the organism<sup>65</sup>. Previous studies reported the lineage-specific grouping  
618 of transcription factors<sup>54,64</sup>. The phylogenetic tree of NAC TFs also revealed the presence of  
619 lineage-specific clustering as well. In a few cases, however, order-specific clustering of NAC TFs  
620 was also observed. For example, NAC TFs in dicot species of the Brassica lineage, including *A.*  
621 *thaliana*, *A. halleri*, *B. napus*, *B. rapa*, *R. sativus*, *R. raphanistrum*, *C. rubella*, *A. alpine*, and  
622 others, grouped together. Similarly, NAC TFs in monocot plant species, including *O. sativa*, *O.*  
623 *nivara*, *B. distachyon*, and others, also grouped together.

624

625

## 626 **Conclusion**

627 NAC TFs are present in higher plants, as well as in a few species of algae. The number of NAC  
628 TFs per genome and their structural and functional properties increased with the complexity of the  
629 organism. The algae *Klebsormidium flaccidum*, a charophyte, was also found to possess NAC  
630 TFs; suggesting that the evolution of NAC TFs was associated with the adaptation of plant life  
631 from an aquatic to a terrestrial form. The paralogous evolution of NAC TFs underlies their diverse  
632 functional role in plant growth and development. Duplication events in NAC TFs were greater  
633 than deletion events and the absence of any loss of NAC TFs in different plant species indicates  
634 their evolution in recent times. As NAC TFs play a pivotal role within the nucleus regulating gene  
635 expression, the presence of bipartite and multipartite nuclear localization signals is of particular  
636 interest and provides the basis for further investigation of their functional roles.

637

## 638 **Materials and Methods**

### 639 *Identification of NAC TFs*

640 NAC genes in the studied plant species were obtained from searches in the National Centre for  
641 Biotechnology Information (NCBI), Phytozome, and Plant Genome databases <sup>66</sup>. BLASTP and  
642 hidden Markov model were used to identify the NAC TFs in different species using AtNAC1 and  
643 AtBAC2 as the query sequences <sup>67</sup>. Protein and CDS sequences of each species were collected  
644 and further analysed. Protein sequences of the NAC TFs were subjected to BLASTP analysis  
645 against a reference database to reconfirm them as a NAC TF of the identified species. All of the  
646 NAC TF protein sequences in the examined species were also subjected to ScanProsite and  
647 InterPro scans to confirm the presence of a NAC domain <sup>68,69</sup>. Sequences that were found to  
648 contain a NAC domain were considered as NAC TFs. The presence of multiple NAC domains,  
649 along with the presence of chimeric NAC domains, were determined through ScanProsite and  
650 InterPro scans. The presence of multiple functional sites in NAC TFs were also analysed using  
651 ScanProsite software.

### 652 *Analysis of membrane attachment and nuclear localization signal sequences*

653 The presence of transmembrane domains in NAC TFs of all of the examined species were  
654 identified using the TMHMM server v. 2.0 <sup>70</sup> and default parameters. Nuclear localization signal  
655 sequences in NAC TFs were identified using NLStradamus software, which uses a hidden Markov  
656 model for the prediction of nuclear localization signals <sup>71</sup>. NAC TF protein sequences were  
657 uploaded in FASTA format to run the program. The parameters used to run the NLS analysis  
658 were; HMM state emission and transition frequencies, 2 state HMM static; prediction type Viterbi  
659 and posterior, prediction cut-off 0.4; prediction display, and image and graphic.

### 660 *Interactome analysis of NAC TFs*

661 *A. thaliana* NAC TFs were used to examine the complex interactome network of NAC TFs. The  
662 individual interaction network of each NAC TF in *A. thaliana* was searched in a string database  
663 that contains 9.6 million proteins from 2031 organisms <sup>72,73</sup>. The interactome network of each of



664 NAC TF were noted and the results were later used to construct the interactome network of *A.*  
665 *thaliana* NAC TFs. The presented interactome network was based on an experimentally validated  
666 network, co-expressed network, and a mined network. These outputs were used to construct the  
667 interactome network. The NAC TFs used to construct the interactome network were subjected to  
668 GO (gene ontology) and cellular process analyses.

### 669 *Gene expression analysis*

670 Differential gene expression of NAC TFs was analysed to elucidate their role in growth,  
671 development, and nitrogen assimilation. *A. thaliana* NAC TFs were used to examine differential  
672 gene expression. Transcriptome data from *A. thaliana* treated with ammonia, nitrate, and urea  
673 were utilized from the PhytoMine database in Phytozome. The expression pattern of NAC TFs for  
674 leaf and root tissues in the treated *A. thaliana* plants were analysed separately. The expression was  
675 measured in fragments per kilobase of exon per million fragments mapped (FPKM). Transcripts  
676 with a zero value were discarded from the study.

### 677 *Construction of a phylogenetic tree*

678 Two approaches were used to construct phylogenetic trees. In the first approach, a phylogenetic  
679 tree was constructed using the NAC TFs of individual species. In the second approach, the NAC  
680 TFs of all of the examined species were used to construct a phylogenetic tree. The phylogenetic  
681 tree for individual species was constructed to determine the deletion and duplication events in  
682 NAC TFs within individual species. Prior to construction of the phylogenetic trees, a model  
683 selection was carried out in MEGA6 software. The following parameters were used in the model,  
684 analysis, model selection; tree to use, automatic (neighbor joining), statistical method, maximum  
685 likelihood; substitution type, nucleotides; gaps/missing data treatment, partial deletion; site  
686 coverage cut-off (%), 95; codons included, 1<sup>st</sup>+2<sup>nd</sup>+3<sup>rd</sup>+non-coding. Based on the lowest BIC  
687 values of model selection, phylogenetic trees of NAC TFs were carried out using the neighbor  
688 joining method, a GTR statistical model, and 1000 bootstrap replicates.

### 689 *Analysis of transition and transversion rates*

690 Transition and transversion rates in NAC TFs within individual species were analysed using  
691 MEGA6 software. The converted MEGA file format of individual species was used to determine  
692 the rate of transition and transversion. The following statistical parameters were used to study the  
693 transition/transversion rate: estimate transition/transversion bias; maximum composite likelihood  
694 estimates of the pattern of nucleotide substitution; substitution type, nucleotides; model/method,  
695 Tamura-Nei; gaps/missing data treatment, pairwise deletion; codon position, 1<sup>st</sup>, 2<sup>nd</sup>, 3<sup>rd</sup>, and non-  
696 coding sites.

### 697 *Analysis of gene deletion and duplication*

698 Prior to the analysis of deletion and duplication events in NAC TFs, a species tree was constructed  
699 in the NCBI taxonomy browser  
700 (<https://www.ncbi.nlm.nih.gov/Taxonomy/CommonTree/wwwcmt.cgi>). All of the studied species  
701 were used to construct the species tree. The resulting phylogenetic trees of individual species in a  
702 nwk file format were uploaded in Notung2.9 software as a gene tree and reconciled as a gene tree

703 with the species tree to obtain duplicated and deleted genes. Deletion and duplication events were  
704 analysed in all of the studied species individually.

705 **Data availability**

706 All the data used during this study was taken from publicly available genomic databases and  
707 details are mentioned in the materials and methods section.

708 **Competing of interest**

709 Authors don't have any competing of interest to declare.

710

711

712

713

714

715

716

717

718

719

720

721

722

723

724

725

726

727

728

729

730

731

732 References

- 733 1. Puranik, S., Sahu, P. P., Srivastava, P. S. & Prasad, M. NAC proteins: Regulation and role  
734 in stress tolerance. *Trends Plant Sci.* **17**, 369–381 (2012).
- 735 2. Ernst, H. A., Nina Olsen, A., Skriver, K., Larsen, S. & Lo Leggio, L. Structure of the  
736 conserved domain of ANAC, a member of the NAC family of transcription factors. *EMBO*  
737 *Rep.* **5**, 297–303 (2004).
- 738 3. Jensen, M. *et al.* The Arabidopsis thaliana NAC transcription factor family: structure-  
739 function relationships and determinants of ANAC019 stress signalling. *Biochem. J.* **426**,  
740 183–196 (2009).
- 741 4. Chen, Q., Wang, Q., Xiong, L. & Lou, Z. A structural view of the conserved domain of rice  
742 stress-responsive NAC1. *Protein Cell* **2**, 55–63 (2011).
- 743 5. Duval, M., Hsieh, T.-F., Kim, S. Y. & Thomas, T. L. Molecular characterization of  
744 AtNAM: a member of the Arabidopsis NAC domain superfamily. *Plant Mol. Biol.* **50**, 237–  
745 248 (2002).
- 746 6. Olsen, A. N., Ernst, H. A., Leggio, L. Lo & Skriver, K. NAC transcription factors:  
747 structurally distinct, functionally diverse. *Trends Plant Sci.* **10**, 79–87 (2005).
- 748 7. Le, D. T. *et al.* Genome-Wide Survey and Expression Analysis of the Plant-Specific NAC  
749 Transcription Factor Family in Soybean During Development and Dehydration Stress. *DNA*  
750 *Res. An Int. J. Rapid Publ. Reports Genes Genomes* **18**, 263–276 (2011).
- 751 8. Olsen, A. N., Ernst, H. A., Leggio, L. Lo & Skriver, K. DNA-binding specificity and  
752 molecular functions of NAC transcription factors. *Plant Sci.* **169**, 785–797 (2005).
- 753 9. Greve, K., La Cour, T., Jensen, M. K., Poulsen, F. M. & Skriver, K. Interactions between  
754 plant RING-H2 and plant-specific NAC (NAM/ATAF1/2/CUC2) proteins: RING-H2  
755 molecular specificity and cellular localization. *Biochem. J.* **371**, 97–108 (2003).
- 756 10. Hao, Y.-J. *et al.* Plant NAC-type transcription factor proteins contain a NARD domain for  
757 repression of transcriptional activation. *Planta* **232**, 1033–1043 (2010).
- 758 11. Fang, Y., You, J., Xie, K., Xie, W. & Xiong, L. Systematic sequence analysis and  
759 identification of tissue-specific or stress-responsive genes of NAC transcription factor  
760 family in rice. *Mol. Genet. Genomics* **280**, 547–563 (2008).
- 761 12. Yamaguchi, M. *et al.* VND-INTERACTING2, a NAC Domain Transcription Factor,  
762 Negatively Regulates Xylem Vessel Formation in Arabidopsis. *Plant Cell* **22**, 1249–1263  
763 (2010).
- 764 13. Ho, S. K. *et al.* Identification of a calmodulin-binding NAC protein as a transcriptional  
765 repressor in Arabidopsis. *J. Biol. Chem.* **282**, 36292–36302 (2007).
- 766 14. Christian, D. *et al.* The transcription factor ATAF2 represses the expression of  
767 pathogenesis-related genes in Arabidopsis. *Plant J.* **43**, 745–757 (2005).
- 768 15. Shen, H., Yin, Y., Chen, F., Xu, Y. & Dixon, R. A. A Bioinformatic Analysis of NAC  
769 Genes for Plant Cell Wall Development in Relation to Lignocellulosic Bioenergy

- 770 Production. *BioEnergy Res.* **2**, 217 (2009).
- 771 16. Mohanta, T., Mohanta, N., Mohanta, Y. & Bae, H. Genome-Wide Identification of Calcium  
772 Dependent Protein Kinase Gene Family in Plant Lineage Shows Presence of Novel D-x-D  
773 and D-E-L Motifs in EF-Hand Domain. *Front. Plant Sci.* **6**, 1146 (2015).
- 774 17. Welner, D. H. *et al.* DNA binding by the plant-specific NAC transcription factors in crystal  
775 and solution: a firm link to WRKY and GCM transcription factors. *Biochem. J.* **444**, 395–  
776 404 (2012).
- 777 18. Shaw, K. L., Grimsley, G. R., Yakovlev, G. I., Makarov, A. A. & Pace, C. N. The effect of  
778 net charge on the solubility, activity, and stability of ribonuclease Sa. *Protein Sci.* **10**,  
779 1206–1215 (2001).
- 780 19. Pergande, M. R. & Cologna, S. M. Isoelectric Point Separations of Peptides and Proteins.  
781 *Proteomes* **5**, 4 (2017).
- 782 20. Cunningham, J. *et al.* Intracellular Electric Field and pH Optimize Protein Localization and  
783 Movement. *PLoS One* **7**, e36894 (2012).
- 784 21. Hoppe, T., Rape, M. & Jentsch, S. Membrane-bound transcription factors: regulated release  
785 by RIP or RUP. *Curr. Opin. Cell Biol.* **13**, 344–348 (2001).
- 786 22. Vik, Å. & Rine, J. Membrane biology: Membrane-regulated transcription. *Curr. Biol.* **10**,  
787 R869–R871 (2000).
- 788 23. Hoppe, T. *et al.* Activation of a Membrane-Bound Transcription Factor by Regulated  
789 Ubiquitin/Proteasome-Dependent Processing. *Cell* **102**, 577–586 (2000).
- 790 24. Seo, P. J., Kim, S. G. & Park, C. M. Membrane-bound transcription factors in plants.  
791 *Trends Plant Sci.* **13**, 550–556 (2008).
- 792 25. Shen, J., Chen, X., Hendershot, L. & Prywes, R. ER Stress Regulation of ATF6  
793 Localization by Dissociation of BiP/GRP78 Binding and Unmasking of Golgi Localization  
794 Signals. *Dev. Cell* **3**, 99–111 (2002).
- 795 26. Liu, J.-X., Srivastava, R., Che, P. & Howell, S. H. An Endoplasmic Reticulum Stress  
796 Response in Arabidopsis Is Mediated by Proteolytic Processing and Nuclear Relocation of  
797 a Membrane-Associated Transcription Factor, bZIP28. *Plant Cell* **19**, 4111–4119 (2007).
- 798 27. Liu, J.-X., Srivastava, R., Che, P. & Howell, S. H. Salt stress responses in Arabidopsis  
799 utilize a signal transduction pathway related to endoplasmic reticulum stress signaling.  
800 *Plant J.* **51**, 897–909 (2007).
- 801 28. Iwata, Y. & Koizumi, N. An Arabidopsis transcription factor, AtbZIP60, regulates the  
802 endoplasmic reticulum stress response in a manner unique to plants. *Proc. Natl. Acad. Sci.*  
803 *U. S. A.* **102**, 5280–5285 (2005).
- 804 29. Kim, Y.-S. *et al.* A Membrane-Bound NAC Transcription Factor Regulates Cell Division  
805 in Arabidopsis. *Plant Cell* **18**, 3132–3144 (2006).
- 806 30. Kim, S.-Y. *et al.* Exploring membrane-associated NAC transcription factors in  
807 Arabidopsis: implications for membrane biology in genome regulation. *Nucleic Acids Res.*  
808 **35**, 203–213 (2007).

- 809 31. Kosugi, S. *et al.* Six classes of nuclear localization signals specific to different binding  
810 grooves of importin  $\alpha$ . *J. Biol. Chem.* **284**, 478–485 (2009).
- 811 32. Mattaj, I. W. & Englmeier, L. Nucleocytoplasmic Transport: The Soluble Phase. *Annu.*  
812 *Rev. Biochem.* **67**, 265–306 (1998).
- 813 33. Kosugi, S., Hasebe, M., Tomita, M. & Yanagawa, H. Nuclear export signal consensus  
814 sequences defined using a localization-based yeast selection system. *Traffic* **9**, 2053–2062  
815 (2008).
- 816 34. Jensen, M. *et al.* Transcriptional regulation by an NAC (NAM–ATAF1,2–CUC2)  
817 transcription factor attenuates ABA signalling for efficient basal defence towards *Blumeria*  
818 *graminis* f. sp. *hordei* in *Arabidopsis*. *Plant J.* **56**, 867–880 (2008).
- 819 35. Xie, Q., Frugis, G., Colgan, D. & Chua, N.-H. *Arabidopsis* NAC1 transduces auxin signal  
820 downstream of TIR1 to promote lateral root development. *Genes Dev.* **14**, 3024–3036  
821 (2000).
- 822 36. He, X. *et al.* AtNAC2, a transcription factor downstream of ethylene and auxin signaling  
823 pathways, is involved in salt stress response and lateral root development. *Plant J.* **44**, 903–  
824 916 (2005).
- 825 37. Sperotto, R. A. *et al.* Identification of up-regulated genes in flag leaves during rice grain  
826 filling and characterization of OsNAC5, a new ABA-dependent transcription factor. *Planta*  
827 **230**, 985–1002 (2009).
- 828 38. Bonetta, L. Interactome under construction. *Nature* **468**, 851 (2010).
- 829 39. Tran, L.-S. P. *et al.* Isolation and Functional Analysis of *Arabidopsis* Stress-Inducible NAC  
830 Transcription Factors That Bind to a Drought-Responsive <em>cis</em>-  
831 Element in the <em>early responsive to dehydration stress 1</em> Promoter.  
832 *Plant Cell* **16**, 2481 LP-2498 (2004).
- 833 40. Jensen, M. K. *et al.* ATAF1 transcription factor directly regulates abscisic acid biosynthetic  
834 gene NCED3 in *Arabidopsis thaliana*. *FEBS Open Bio* **3**, 321–327 (2013).
- 835 41. Kazuo, N., Tomohiro, K., Kazuko, Y.-S. & Kazuo, S. A nuclear gene, *erd1*, encoding a  
836 chloroplast-targeted Clp protease regulatory subunit homolog is not only induced by water  
837 stress but also developmentally up-regulated during senescence in *Arabidopsis thaliana*.  
838 *Plant J.* **12**, 851–861 (2003).
- 839 42. Reeves, W. M., Lynch, T. J., Mobin, R. & Finkelstein, R. R. Direct targets of the  
840 transcription factors ABA-Insensitive(ABI)4 and ABI5 reveal synergistic action by ABI4  
841 and several bZIP ABA response factors. *Plant Mol. Biol.* **75**, 347–363 (2011).
- 842 43. Jensen, M. K. & Skriver, K. NAC transcription factor gene regulatory and protein-protein  
843 interaction networks in plant stress responses and senescence. *IUBMB Life* **66**, 156–166  
844 (2014).
- 845 44. Jingjing, J. *et al.* WRKY transcription factors in plant responses to stresses. *J. Integr. Plant*  
846 *Biol.* **59**, 86–101 (2016).
- 847 45. Pandey, S. P. & Somssich, I. E. The Role of WRKY Transcription Factors in Plant  
848 Immunity. *Plant Physiol.* **150**, 1648–1655 (2009).

- 849 46. Saha, D., Prasad, A. M. & Srinivasan, R. Pentatricopeptide repeat proteins and their  
850 emerging roles in plants. *Plant Physiol. Biochem.* **45**, 521–534 (2007).
- 851 47. Barkan, A. & Small, I. Pentatricopeptide Repeat Proteins in Plants. *Annu. Rev. Plant Biol.*  
852 **65**, 415–442 (2014).
- 853 48. Nandety, R. S. *et al.* The role of TIR-NBS and TIR-X proteins in plant basal defense  
854 responses. *Plant Physiol.* **162**, 1459–72 (2013).
- 855 49. Wan, H. *et al.* Analysis of TIR- and non-TIR-NBS-LRR disease resistance gene analogous  
856 in pepper: characterization, genetic variation, functional divergence and expression  
857 patterns. *BMC Genomics* **13**, 502 (2012).
- 858 50. Mohanta, T. K. *et al.* Ginkgo biloba responds to herbivory by activating early signaling and  
859 direct defenses. *PLoS One* **7**, e32822 (2012).
- 860 51. Mohanta, T. K., Arora, P. K., Mohanta, N., Parida, P. & Bae, H. Identification of new  
861 members of the MAPK gene family in plants shows diverse conserved domains and novel  
862 activation loop variants. *BMC Genomics* **16**, (2015).
- 863 52. Mohanta, T. K., Mohanta, N., Mohanta, Y. K. & Bae, H. Genome-Wide Identification of  
864 Calcium Dependent Protein Kinase Gene Family in Plant Lineage Shows Presence of  
865 Novel D-x-D and D-E-L Motifs in EF-Hand Domain. *Front. Plant Sci.* **6**, 1146 (2015).
- 866 53. Zhang, X. *et al.* Multiple functional self-association interfaces in plant TIR domains. *Proc.*  
867 *Natl. Acad. Sci.* **114**, E2046 LP-E2052 (2017).
- 868 54. Mohanta, T. K., Park, Y.-H. & Bae, H. Novel Genomic and Evolutionary Insight of WRKY  
869 Transcription Factors in Plant Lineage. *Sci. Rep.* **6**, (2016).
- 870 55. Rinerson, C. I., Rabara, R. C., Tripathi, P., Shen, Q. J. & Rushton, P. J. The evolution of  
871 WRKY transcription factors. *BMC Plant Biol.* **15**, 1–18 (2015).
- 872 56. Holger, T., Mario, B., Angela, S. & Bernd-Joachim, T. Expression of the gene and  
873 processed pseudogenes encoding the human and rabbit translationally controlled tumour  
874 protein (TCTP). *Eur. J. Biochem.* **267**, 5473–5481 (2003).
- 875 57. Faustino, L. I., Moretti, A. P. & Graciano, C. Fertilization with urea, ammonium and nitrate  
876 produce different effects on growth, hydraulic traits and drought tolerance in Pinus taeda  
877 seedlings. *Tree Physiol.* **35**, 1062–1074 (2015).
- 878 58. Kirkpatrick, C. L. *et al.* Growth control switch by a DNA-damage-inducible toxin–  
879 antitoxin system in *Caulobacter crescentus*. *Nat. Microbiol.* **1**, 16008 (2016).
- 880 59. Xu, X., Liu, Q., Fan, L., Cui, X. & Zhou, X. Analysis of synonymous codon usage and  
881 evolution of begomoviruses. *J. Zhejiang Univ. Sci. B* **9**, 667–674 (2008).
- 882 60. Hu, T. & Banzhaf, W. Nonsynonymous to Synonymous Substitution Ratio  $k_a/k_s$ :  
883 Measurement for Rate of Evolution in Evolutionary Computation. in *PPSNX, LNCS 5199*  
884 448–457 (2008).
- 885 61. Tomoko, O. Synonymous and nonsynonymous substitutions in mammalian genes and the  
886 nearly neutral theory. *J. Mol. Evol.* **40**, 56–63 (1995).
- 887 62. Slotte, T. *et al.* The *Capsella rubella* genome and the genomic consequences of rapid

- 888 mating system evolution. *Nat. Genet.* **45**, 831–5 (2013).
- 889 63. Bolger, A. *et al.* The genome of the stress-tolerant wild tomato species *Solanum pennellii*.  
890 *Nat. Genet.* **46**, 1034 (2014).
- 891 64. Jin, X. *et al.* Divergent Evolutionary Patterns of NAC Transcription Factors Are Associated  
892 with Diversification and Gene Duplications in Angiosperm. *Front. Plant Sci.* **8**, 1156  
893 (2017).
- 894 65. Schmitz, J. F., Zimmer, F. & Bornberg-Bauer, E. Mechanisms of transcription factor  
895 evolution in Metazoa. *Nucleic Acids Res.* **44**, 6287–6297 (2016).
- 896 66. Goodstein, D. M. *et al.* Phytozome: a comparative platform for green plant genomics.  
897 *Nucleic Acids Res.* **40**, D1178-86 (2012).
- 898 67. Boratyn, G. M. *et al.* Domain enhanced lookup time accelerated BLAST. *Biol. Direct* **7**, 12  
899 (2012).
- 900 68. Jones, P. *et al.* InterProScan 5: genome-scale protein function classification. *Bioinformatics*  
901 **30**, 1236–1240 (2014).
- 902 69. de Castro, E. *et al.* ScanProsite: detection of PROSITE signature matches and ProRule-  
903 associated functional and structural residues in proteins. *Nucleic Acids Res.* **34**, W362-5  
904 (2006).
- 905 70. Krogh, A., Larsson, B., von Heijne, G. & Sonnhammer, E. L. L. Predicting transmembrane  
906 protein topology with a hidden markov model: application to complete genomes 11Edited  
907 by F. Cohen. *J. Mol. Biol.* **305**, 567–580 (2001).
- 908 71. Nguyen Ba, A., Pogoutse, A., Provar, N. & Moses, A. NLStradamus: a simple Hidden  
909 Markov Model for nuclear localization signal prediction. *BMC Bioinformatics* **10**, 202  
910 (2009).
- 911 72. Szklarczyk, D. *et al.* The STRING database in 2017: quality-controlled protein–protein  
912 association networks, made broadly accessible. *Nucleic Acids Res.* **45**, D362–D368 (2017).
- 913 73. von Mering, C. *et al.* STRING: a database of predicted functional associations between  
914 proteins. *Nucleic Acids Res.* **31**, 258–261 (2003).

915

916

917

918

919

920

921

922

923 **Author contributions**

924 TKM: conceived the idea, performed the experiments and analysis, drafted and revised the  
925 manuscript, AK: performed the analysis, DY: revised the manuscript, AH: drafted and revised the  
926 manuscript, BT: revised the manuscript, ALK: analysed the data and revised the manuscript, EFA:  
927 revised the manuscript, AAH: revised the manuscript.

928

929

930

931

932

933

934

935

936

937

938

939

940

941

942

943

944

945

946

947

948

949

950



## 951 **Figure legends**

### 952 **Figure 1**

953 The distribution of the molecular weight of NAC TFs. The molecular weight of NAC TFs ranged  
954 from 2.94 kDa (*Fragaria x ananassa*, FANhyb\_icon00034378\_a.1.g00001.1) to 346.46 kDa  
955 (*Trifolium pratense*, Tp57577\_TGAC\_v2\_mRNA14116). The average molecular weight of NAC  
956 TFs was 38.72 kDa. In total, 17158 NAC TFs were utilized in the analysis of molecular weight.  
957 The analysis was conducted using a protein isoelectric point calculator (<http://isoelectric.org/>).

### 958 **Figure 2**

959 The distribution of the isoelectric point of NAC TFs. The isoelectric point of NAC TFs ranged  
960 from pI 3.78 (OB07G17140.1, *Oryza brachyantha*) to pI 11.47 (Sevir.3G242500, *Setaria viridis*).  
961 The average isoelectric point of NAC TFs was 6.38. A total of 17158 NAC TFs were utilized in  
962 the analysis of the pI of NAC TFs. The analysis of pI was conducted using a protein isoelectric  
963 point calculator (<http://isoelectric.org/>).

### 964 **Figure 3**

965 Interactome network of NAC TFs. The interactome network of NAC TF reflects a diverse  
966 complex of interacting proteins. The NAC TFs of *A. thaliana* were utilized in the interactome  
967 network analysis. The interactome map of *A. thaliana* was determined using the string database  
968 (<https://string-db.org>).

### 969 **Figure 4**

970 Chimeric NAC domains. NAC TFs possess chimeric NAC domains with at least 34 diverse  
971 chimeric NAC domains identified in the studied species. The identification of chimeric NAC  
972 domain sequences was determined using the ScanProsite and InterProScan server.

### 973 **Figure 5**

974 Chimeric NAC domains NAC TFs possess chimeric NAC domains with at least 21 diverse  
975 chimeric NAC domains identified in the studied species. The identification of chimeric NAC  
976 domain sequences was determined using the ScanProsite and InterProScan server.

### 977 **Figure 6**

978 Differential expression of NAC TFs in leaves of *A. thaliana* plants treated with ammonia, nitrate,  
979 and urea. The expression of *A. thaliana* NAC TFs was analysed to determine their response to  
980 different sources of nitrogen. Expression data were obtained from the PhytoMine database in  
981 Phytozome and presented as FPKM (Fragments per Kilobase of transcripts per million mapped  
982 reads).

### 983 **Figure 7**

984 Differential expression of NAC TFs in roots of *A. thaliana* plants treated with ammonia, nitrate,  
985 and urea. The expression of *A. thaliana* NAC TFs was analysed to determine their response to

986 different sources of nitrogen. Expression data were obtained from the PhytoMine database in  
987 Phytozome and presented as FPKM (Fragments per Kilobase of transcripts per million mapped  
988 reads).

989 **Figure 8**

990 Phylogenetic tree of NAC TFs. A phylogenetic tree of NAC TF reveals the presence of seven  
991 clustered orthologous groups (COGs). Each group also possesses two or more sub-groups. The  
992 phylogenetic tree shows lineage (monocot/dicot) specific grouping of NAC TFs. The phylogenetic  
993 tree was constructed using the neighbor joining method with 1000 bootstrap replicates.

994

995

996

997

998

999

1000

1001

1002

1003

1004

1005

1006

1007

1008

1009

1010

1011

1012

1013

1014

1015 Table 1. Genomic details of NAC TFs of plants

| Sl. No   | Name of the species                 | No. of double domain NAC TF | No. of Novel chimeric NAC TFs | Total No. of NAC TFs | No. of duplicated genes | No. of conditional duplicated genes | No. of lost genes | No. of orthologous genes | No. of paralogous genes | No. of transfer genes |
|----------|-------------------------------------|-----------------------------|-------------------------------|----------------------|-------------------------|-------------------------------------|-------------------|--------------------------|-------------------------|-----------------------|
| Monocots |                                     |                             |                               |                      |                         |                                     |                   |                          |                         |                       |
| 1        | <i>Aegilops tauschii</i>            |                             | 4                             | 117                  | 114                     | 0                                   | 0                 | 0                        | 114                     | 0                     |
| 2        | <i>Brachypodium distachyon</i>      | 2                           | 1                             | 137                  | 135                     | 0                                   | 0                 | 0                        | 135                     | 0                     |
| 3        | <i>Brachypodium stacei</i>          | 1                           | 1                             | 128                  | 127                     | 0                                   | 0                 | 0                        | 127                     | 0                     |
| 4        | <i>Hordeum vulgare</i>              |                             |                               | 76                   | 76                      | 0                                   | 0                 | 0                        | 76                      | 0                     |
| 5        | <i>Leersia perrieri</i>             | 5                           | 2                             | 163                  | 162                     | 0                                   | 0                 | 0                        | 162                     | 0                     |
| 6        | <i>Oropetium thomaeum</i>           | 1                           |                               | 118                  | 103                     | 0                                   | 0                 | 0                        | 103                     | 0                     |
| 7        | <i>Oryza barthii</i>                |                             | 4                             | 134                  | 138                     | 0                                   | 0                 | 0                        | 138                     | 0                     |
| 8        | <i>Oryza brachyantha</i>            | 1                           | 1                             | 118                  | 110                     | 0                                   | 0                 | 0                        | 110                     | 0                     |
| 9        | <i>Oryza glaberrima</i>             | 1                           |                               | 116                  | 110                     | 0                                   | 0                 | 0                        | 110                     | 0                     |
| 10       | <i>Oryza glumipatula</i>            | 2                           |                               | 140                  | 139                     | 0                                   | 0                 | 0                        | 139                     | 0                     |
| 11       | <i>Oryza longistaminata</i>         | 1                           | 6                             | 125                  | 98                      | 0                                   | 0                 | 0                        | 98                      | 0                     |
| 12       | <i>Oryza meridionalis</i>           | 2                           | 2                             | 127                  | 123                     | 0                                   | 0                 | 0                        | 123                     | 0                     |
| 13       | <i>Oryza nivara</i>                 | 4                           | 1                             | 146                  | 130                     | 0                                   | 0                 | 0                        | 130                     | 0                     |
| 14       | <i>Oryza punctata</i>               | 6                           | 1                             | 135                  | 133                     | 0                                   | 0                 | 0                        | 133                     | 0                     |
| 15       | <i>Oryza rufipogon</i>              | 4                           | 3                             | 136                  | 129                     | 0                                   | 0                 | 0                        | 129                     | 0                     |
| 16       | <i>Oryza sativa subsp. indica</i>   | 1                           | 3                             | 157                  | 156                     | 0                                   | 0                 | 0                        | 156                     | 0                     |
| 17       | <i>Oryza sativa subsp. japonica</i> | 1                           |                               | 139                  | 138                     | 0                                   | 0                 | 0                        | 138                     | 0                     |
| 18       | <i>Panicum hallii</i>               | 3                           | 6                             | 139                  | 126                     | 0                                   | 0                 | 0                        | 126                     | 0                     |
| 19       | <i>Panicum virgatum</i>             | 9                           | 6                             | 310                  | 309                     | 0                                   | 0                 | 0                        | 309                     | 0                     |
| 20       | <i>Phoenix dactylifera</i>          | 3                           | 1                             | 124                  | 123                     | 0                                   | 0                 | 0                        | 123                     | 0                     |
| 21       | <i>Phyllostachys edulis</i>         |                             |                               | 125                  | 124                     | 0                                   | 0                 | 0                        | 124                     | 0                     |
| 22       | <i>Phyllostachys heterocyclus</i>   | 2                           | 2                             | 125                  | 124                     | 0                                   | 0                 | 0                        | 124                     | 0                     |
| 23       | <i>Saccharum officinarum</i>        |                             |                               | 44                   | 33                      | 0                                   | 0                 | 0                        | 33                      | 0                     |
| 24       | <i>Setaria italica</i>              | 4                           |                               | 139                  | 134                     | 0                                   | 0                 | 0                        | 134                     | 0                     |
| 25       | <i>Setaria viridis</i>              | 1                           |                               | 135                  | 118                     | 0                                   | 0                 | 0                        | 118                     | 0                     |
| 26       | <i>Sorghum bicolor</i>              | 1                           |                               | 141                  | 134                     | 0                                   | 0                 | 0                        | 134                     | 0                     |
| 27       | <i>Spirodela polyrhiza</i>          |                             |                               | 55                   | 48                      | 0                                   | 0                 | 0                        | 48                      | 0                     |
| 28       | <i>Triticum aestivum</i>            | 2                           | 2                             | 263                  | 209                     | 0                                   | 0                 | 0                        | 209                     | 0                     |
| 29       | <i>Triticum urartu</i>              |                             | 1                             | 103                  | 74                      | 0                                   | 0                 | 0                        | 74                      | 0                     |
| 30       | <i>Zea mays</i>                     | 1                           | 1                             | 130                  | 119                     | 0                                   | 0                 | 0                        | 119                     | 0                     |
| 31       | <i>Zostera marina</i>               | 1                           |                               | 62                   | 55                      | 0                                   | 0                 | 0                        | 55                      | 0                     |
| 32       | <i>Zoysia japonica</i>              |                             | 4                             | 176                  | 160                     | 0                                   | 0                 | 0                        | 160                     | 0                     |
| 33       | <i>Zoysia matrella</i>              | 1                           | 3                             | 313                  | 230                     | 0                                   | 0                 | 0                        | 230                     | 0                     |
| 34       | <i>Zoysia pacifica</i>              | 1                           | 2                             | 205                  | 183                     | 0                                   | 0                 | 0                        | 183                     | 0                     |
| Dicots   |                                     |                             |                               |                      |                         |                                     |                   |                          |                         |                       |
| 35       | <i>Actinidia chinensis</i>          | 1                           | 5                             | 167                  | 166                     | 0                                   | 0                 | 0                        | 166                     | 0                     |
| 36       | <i>Aethionema arabicum</i>          | 3                           |                               | 85                   | 84                      | 0                                   | 0                 | 0                        | 84                      | 0                     |

|    |                                   |    |   |     |     |   |   |   |     |   |
|----|-----------------------------------|----|---|-----|-----|---|---|---|-----|---|
| 37 | <i>Amaranthus hypochondriacus</i> | 1  |   | 44  | 37  | 0 | 0 | 0 | 37  | 0 |
| 38 | <i>Amborella trichopoda</i>       |    |   | 46  | 45  | 0 | 0 | 0 | 45  | 0 |
| 39 | <i>Ananas comosus</i>             |    | 1 | 73  | 72  | 0 | 0 | 0 | 72  | 0 |
| 40 | <i>Aquilegia coerulea</i>         |    |   | 80  | 79  | 0 | 0 | 0 | 79  | 0 |
| 41 | <i>Arabidopsis halleri</i>        | 2  |   | 94  | 93  | 0 | 0 | 0 | 93  | 0 |
| 42 | <i>Arabidopsis lyrata</i>         | 4  | 1 | 122 | 121 | 0 | 0 | 0 | 121 | 0 |
| 43 | <i>Arabidopsis thaliana</i>       | 5  |   | 113 | 112 | 0 | 0 | 0 | 112 | 0 |
| 44 | <i>Arabis alpina</i>              | 1  |   | 82  | 81  | 0 | 0 | 0 | 81  | 0 |
| 45 | <i>Arachis duranensis</i>         |    |   | 82  | 81  | 0 | 0 | 0 | 81  | 0 |
| 46 | <i>Arachis hypogaea</i>           |    |   | 32  | 31  | 0 | 0 | 0 | 31  | 0 |
| 47 | <i>Arachis ipaensis</i>           |    |   | 83  | 81  | 0 | 0 | 0 | 81  | 0 |
| 48 | <i>Artemisia annua</i>            |    |   | 28  | 27  | 0 | 0 | 0 | 27  | 0 |
| 49 | <i>Azadirachta indica</i>         |    |   | 183 | 182 | 0 | 0 | 0 | 182 | 0 |
| 50 | <i>Beta vulgaris</i>              |    |   | 53  | 52  | 0 | 0 | 0 | 52  | 0 |
| 51 | <i>Boechera stricta</i>           | 2  |   | 123 | 122 | 0 | 0 | 0 | 122 | 0 |
| 52 | <i>Brassica napus</i>             | 10 | 7 | 410 | 409 | 0 | 0 | 0 | 409 | 0 |
| 53 | <i>Brassica oleracea</i>          | 4  | 3 | 271 | 270 | 0 | 0 | 0 | 270 | 0 |
| 54 | <i>Brassica rapa</i>              | 4  | 2 | 256 | 255 | 0 | 0 | 0 | 255 | 0 |
| 55 | <i>Cajanus cajan</i>              |    |   | 96  | 95  | 0 | 0 | 0 | 95  | 0 |
| 56 | <i>Camelina sativa</i>            | 17 | 3 | 341 | 330 | 0 | 0 | 0 | 330 | 0 |
| 57 | <i>Cannabis sativa</i>            |    |   | 58  | 57  | 0 | 0 | 0 | 57  | 0 |
| 58 | <i>Capsella grandiflora</i>       | 2  |   | 95  | 94  | 0 | 0 | 0 | 94  | 0 |
| 59 | <i>Capsella rubella</i>           | 5  |   | 119 | 118 | 0 | 0 | 0 | 118 | 0 |
| 60 | <i>Capsicum annum</i>             |    |   | 96  | 95  | 0 | 0 | 0 | 95  | 0 |
| 61 | <i>Carica papaya</i>              |    |   | 82  | 81  | 0 | 0 | 0 | 81  | 0 |
| 62 | <i>Castanea mollissima</i>        | 4  |   | 91  | 78  | 0 | 0 | 0 | 78  | 0 |
| 63 | <i>Catharanthus roseus</i>        |    | 2 | 121 | 120 | 0 | 0 | 0 | 120 | 0 |
| 64 | <i>Chenopodium quinoa</i>         |    | 1 | 96  | 95  | 0 | 0 | 0 | 95  | 0 |
| 65 | <i>Cicer arietinum</i>            |    |   | 96  | 95  | 0 | 0 | 0 | 95  | 0 |
| 66 | <i>Citrullus lanatus</i>          |    |   | 80  | 79  | 0 | 0 | 0 | 79  | 0 |
| 67 | <i>Citrus clementina</i>          |    |   | 129 | 128 | 0 | 0 | 0 | 128 | 0 |
| 68 | <i>Citrus sinensis</i>            | 2  |   | 145 | 143 | 0 | 0 | 0 | 143 | 0 |
| 69 | <i>Coffea canephora</i>           |    |   | 63  | 62  | 0 | 0 | 0 | 62  | 0 |
| 70 | <i>Cucumis melo</i>               |    |   | 92  | 91  | 0 | 0 | 0 | 91  | 0 |
| 71 | <i>Cucumis sativus</i>            |    |   | 83  | 80  | 0 | 0 | 0 | 80  | 0 |
| 72 | <i>Daucus carota</i>              |    | 2 | 96  | 95  | 0 | 0 | 0 | 95  | 0 |
| 73 | <i>Dianthus caryophyllus</i>      |    |   | 79  | 77  | 0 | 0 | 0 | 77  | 0 |
| 74 | <i>Dichanthelium oligosanthes</i> | 8  | 2 | 131 | 100 | 0 | 0 | 0 | 100 | 0 |
| 75 | <i>Doroceras hygrometricum</i>    |    | 2 | 83  | 76  | 0 | 0 | 0 | 76  | 0 |
| 76 | <i>Elaeis guineensis</i>          | 2  | 1 | 170 | 167 | 0 | 0 | 0 | 167 | 0 |
| 77 | <i>Eragrostis tef</i>             | 8  | 3 | 172 | 165 | 0 | 0 | 0 | 165 | 0 |
| 78 | <i>Eucalyptus camaldulensis</i>   |    |   | 200 | 124 | 0 | 0 | 0 | 124 | 0 |
| 79 | <i>Eucalyptus grandis</i>         |    |   | 164 | 150 | 0 | 0 | 0 | 150 | 0 |
| 80 | <i>Eutrema salsugineum</i>        | 2  |   | 122 | 104 | 0 | 0 | 0 | 104 | 0 |
| 81 | <i>Fragaria vesca</i>             | 3  | 6 | 127 | 123 | 0 | 0 | 0 | 123 | 0 |
| 82 | <i>Fragaria x ananassa</i>        | 2  | 1 | 98  | 97  | 0 | 0 | 0 | 97  | 0 |
| 83 | <i>Genlisea aurea</i>             |    | 1 | 45  | 42  | 0 | 0 | 0 | 42  | 0 |
| 84 | <i>Glycine max</i>                |    |   | 180 | 175 | 0 | 0 | 0 | 175 | 0 |
| 85 | <i>Glycine soja</i>               |    | 1 | 173 | 166 | 0 | 0 | 0 | 166 | 0 |

|     |                                  |   |   |     |     |   |   |   |     |   |
|-----|----------------------------------|---|---|-----|-----|---|---|---|-----|---|
| 86  | <i>Gossypium arboreum</i>        |   |   | 150 | 146 | 0 | 0 | 0 | 146 | 0 |
| 87  | <i>Gossypium hirsutum</i>        | 1 | 2 | 306 | 296 | 0 | 0 | 0 | 296 | 0 |
| 88  | <i>Gossypium raimondii</i>       |   |   | 153 | 145 | 0 | 0 | 0 | 145 | 0 |
| 89  | <i>Helianthus annuus</i>         |   |   | 21  | 20  | 0 | 0 | 0 | 20  | 0 |
| 90  | <i>Humulus lupulus</i>           |   |   | 74  | 68  | 0 | 0 | 0 | 68  | 0 |
| 91  | <i>Ipomoea trifida</i>           | 1 | 2 | 131 | 123 | 0 | 0 | 0 | 123 | 0 |
| 92  | <i>Jatropha curcas</i>           |   | 1 | 97  | 93  | 0 | 0 | 0 | 93  | 0 |
| 93  | <i>Juglans regia</i>             | 3 |   | 92  | 81  | 0 | 0 | 0 | 81  | 0 |
| 94  | <i>Kalanchoe laxiflora</i>       |   |   | 166 | 165 | 0 | 0 | 0 | 165 | 0 |
| 95  | <i>Kalanchoe marnieriana</i>     |   |   | 179 | 178 | 0 | 0 | 0 | 178 | 0 |
| 96  | <i>Lactuca sativa</i>            |   |   | 54  | 52  | 0 | 0 | 0 | 52  | 0 |
| 97  | <i>Linum usitatissimum</i>       | 1 | 1 | 191 | 187 | 0 | 0 | 0 | 187 | 0 |
| 98  | <i>Lotus japonicus</i>           | 2 |   | 98  | 92  | 0 | 0 | 0 | 92  | 0 |
| 99  | <i>Malus domestica</i>           | 2 | 9 | 253 | 232 | 0 | 0 | 0 | 232 | 0 |
| 100 | <i>Manihot esculenta</i>         |   |   | 130 | 128 | 0 | 0 | 0 | 128 | 0 |
| 101 | <i>Medicago truncatula</i>       | 1 |   | 97  | 90  | 0 | 0 | 0 | 90  | 0 |
| 102 | <i>Mimulus guttatus</i>          |   |   | 114 | 113 | 0 | 0 | 0 | 113 | 0 |
| 103 | <i>Morus notabilis</i>           |   | 2 | 78  | 77  | 0 | 0 | 0 | 77  | 0 |
| 104 | <i>Musa acuminata</i>            | 1 | 1 | 170 | 164 | 0 | 0 | 0 | 164 | 0 |
| 105 | <i>Nelumbo nucifera</i>          |   |   | 88  | 79  | 0 | 0 | 0 | 79  | 0 |
| 106 | <i>Nicotiana benthamiana</i>     | 2 | 2 | 227 | 185 | 0 | 0 | 0 | 185 | 0 |
| 107 | <i>Nicotiana glauca</i>          |   |   | 156 | 149 | 0 | 0 | 0 | 149 | 0 |
| 108 | <i>Nicotiana tabacum</i>         |   |   | 280 | 279 | 0 | 0 | 0 | 279 | 0 |
| 109 | <i>Nicotiana tomentosiformis</i> |   |   | 172 | 162 | 0 | 0 | 0 | 162 | 0 |
| 110 | <i>Ocimum tenuiflorum</i>        | 2 | 1 | 110 | 82  | 0 | 0 | 0 | 82  | 0 |
| 111 | <i>Petunia axillaris</i>         | 3 |   | 131 | 108 | 0 | 0 | 0 | 108 | 0 |
| 112 | <i>Petunia inflata</i>           |   |   | 157 | 147 | 0 | 0 | 0 | 147 | 0 |
| 113 | <i>Phaseolus vulgaris</i>        |   |   | 85  | 84  | 0 | 0 | 0 | 84  | 0 |
| 114 | <i>Populus euphratica</i>        | 2 | 3 | 155 | 149 | 0 | 0 | 0 | 149 | 0 |
| 115 | <i>Populus trichocarpa</i>       |   | 1 | 169 | 149 | 0 | 0 | 0 | 149 | 0 |
| 116 | <i>Prunus mume</i>               | 1 |   | 129 | 128 | 0 | 0 | 0 | 128 | 0 |
| 117 | <i>Prunus persica</i>            | 1 | 1 | 115 | 114 | 0 | 0 | 0 | 114 | 0 |
| 118 | <i>Pyrus bretschneideri</i>      | 1 | 5 | 185 | 183 | 0 | 0 | 0 | 183 | 0 |
| 119 | <i>Raphanus raphanistrum</i>     | 4 | 3 | 207 | 206 | 0 | 0 | 0 | 206 | 0 |
| 120 | <i>Raphanus sativus</i>          | 5 | 1 | 217 | 197 | 0 | 0 | 0 | 197 | 0 |
| 121 | <i>Ricinus communis</i>          |   |   | 95  | 87  | 0 | 0 | 0 | 87  | 0 |
| 122 | <i>Salix purpurea</i>            |   |   | 175 | 152 | 0 | 0 | 0 | 152 | 0 |
| 123 | <i>Salvia miltiorrhiza</i>       | 1 | 2 | 87  | 81  | 0 | 0 | 0 | 81  | 0 |
| 124 | <i>Sesamum indicum</i>           |   |   | 105 | 104 | 0 | 0 | 0 | 104 | 0 |
| 125 | <i>Sisymbrium irio</i>           | 2 | 2 | 121 | 118 | 0 | 0 | 0 | 118 | 0 |
| 126 | <i>Solanum lycopersicum</i>      |   |   | 101 | 94  | 0 | 0 | 0 | 94  | 0 |
| 127 | <i>Solanum melongena</i>         | 1 | 3 | 95  | 85  | 0 | 0 | 0 | 85  | 0 |
| 128 | <i>Solanum pennellii</i>         |   | 2 | 102 | 98  | 0 | 0 | 0 | 98  | 0 |
| 129 | <i>Solanum pimpinellifolium</i>  |   |   | 97  | 90  | 0 | 0 | 0 | 90  | 0 |
| 130 | <i>Solanum tuberosum</i>         | 1 |   | 129 | 115 | 0 | 0 | 0 | 115 | 0 |
| 131 | <i>Spinacia oleracea</i>         |   |   | 45  | 43  | 0 | 0 | 0 | 43  | 0 |
| 132 | <i>Tarenaya hassleriana</i>      | 1 |   | 178 | 177 | 0 | 0 | 0 | 177 | 0 |
| 133 | <i>Thellungiella halophila</i>   | 2 |   | 122 | 121 | 0 | 0 | 0 | 121 | 0 |
| 134 | <i>Thellungiella parvula</i>     | 1 |   | 92  | 91  | 0 | 0 | 0 | 91  | 0 |

|              |                                   |   |   |     |     |   |   |   |     |   |
|--------------|-----------------------------------|---|---|-----|-----|---|---|---|-----|---|
| 135          | <i>Theobroma cacao</i>            |   |   | 132 | 131 | 0 | 0 | 0 | 131 | 0 |
| 136          | <i>Trifolium pratense</i>         | 2 | 2 | 97  | 76  | 0 | 0 | 0 | 76  | 0 |
| 137          | <i>Utricularia gibba</i>          |   | 1 | 74  | 73  | 0 | 0 | 0 | 73  | 0 |
| 138          | <i>Vigna angularis</i>            |   |   | 98  | 97  | 0 | 0 | 0 | 97  | 0 |
| 139          | <i>Vigna radiata</i>              | 2 |   | 82  | 81  | 0 | 0 | 0 | 81  | 0 |
| 140          | <i>Vigna unguiculata</i>          |   |   | 20  | 19  | 0 | 0 | 0 | 19  | 0 |
| 141          | <i>Ziziphus jujuba</i>            |   |   | 101 | 100 | 0 | 0 | 0 | 100 | 0 |
| 142          | <i>Vitis vinifera</i>             | 1 |   | 70  | 79  | 0 | 0 | 0 | 79  | 0 |
| Gymnosperms  |                                   |   |   |     |     |   |   |   |     |   |
| 143          | <i>Picea abies</i>                | 1 |   | 100 | 73  | 0 | 0 | 0 | 73  | 0 |
| 144          | <i>Picea glauca</i>               |   |   | 32  | 31  | 0 | 0 | 0 | 31  | 0 |
| 145          | <i>Picea sitchensis</i>           |   |   | 16  | 15  | 0 | 0 | 0 | 15  | 0 |
| 146          | <i>Pinus taeda</i>                |   |   | 31  | 27  | 0 | 0 | 0 | 27  | 0 |
| 147          | <i>Pseudotsuga menziesii</i>      | 5 | 3 | 196 | 195 | 0 | 0 | 0 | 195 | 0 |
| Pteridophyte |                                   |   |   |     |     |   |   |   |     |   |
| 148          | <i>Selaginella moellendorffii</i> |   |   | 22  | 21  | 0 | 0 | 0 | 21  | 0 |
| Bryophytes   |                                   |   |   |     |     |   |   |   |     |   |
| 149          | <i>Marchantia polymorpha</i>      |   |   | 9   |     |   |   |   |     |   |
| 150          | <i>Physcomitrella patens</i>      |   |   | 33  | 32  | 0 | 0 | 0 | 32  | 0 |
| 151          | <i>Sphagnum fallax</i>            |   |   | 26  | 25  | 0 | 0 | 0 | 25  | 0 |
| Algae        |                                   |   |   |     |     |   |   |   |     |   |
| 152          | <i>Bathycoccus prasinus</i>       |   |   | 0   | 0   | 0 | 0 | 0 | 0   | 0 |
| 153          | <i>Chlamydomonas reinhardtii</i>  |   |   | 0   | 0   | 0 | 0 | 0 | 0   | 0 |
| 154          | <i>Chlorella sp. NC64A</i>        |   |   | 0   | 0   | 0 | 0 | 0 | 0   | 0 |
| 155          | <i>Coccomyxa sp.</i>              |   |   | 0   | 0   | 0 | 0 | 0 | 0   | 0 |
| 156          | <i>Dunaliella salina</i>          |   |   | 0   | 0   | 0 | 0 | 0 | 0   | 0 |
| 157          | <i>Klebsormidium flaccidum</i>    |   |   | 3   | 0   | 0 | 0 | 0 | 0   | 0 |
| 158          | <i>Micromonas pusilla</i>         |   |   | 0   | 0   | 0 | 0 | 0 | 0   | 0 |
| 159          | <i>Ostreococcus lucimarinus</i>   |   |   | 0   | 0   | 0 | 0 | 0 | 0   | 0 |
| 160          | <i>Volvox carteri</i>             |   |   | 0   | 0   | 0 | 0 | 0 | 0   | 0 |

1016

1017

1018

1019

1020

1021

1022

1023

1024

1025

1026 Table 2

1027 Interactome partners of NAC TFs in plants.

1028

| NAC TFs       | Experimental Interactions                              | Co-expression                   | Text mining Interactions                                 |
|---------------|--------------------------------------------------------|---------------------------------|----------------------------------------------------------|
| <b>NAC1</b>   | RNS1,<br>AT3G10260,<br>AT1G17080                       |                                 | NAC024, NAC095, ARV1, AT2G01410,<br>AT1G60380, AT1G60340 |
| <b>NAC2</b>   | ERD14                                                  | NAC32, NAC102,<br>DREB2A        | NAC32, NAC102                                            |
| <b>NAC3</b>   | ***                                                    | ****                            | NTL                                                      |
| <b>NAC4</b>   | ***                                                    | ****                            | UBC30                                                    |
| <b>NAC5</b>   | ****                                                   | ****                            | CYP96A2, MYB                                             |
| <b>NAC7</b>   | VND7                                                   | XCP1, XCP2                      | VND7, MYB46                                              |
| <b>NAC8</b>   | ***                                                    | ATM, ATR                        | ATM, ATR                                                 |
| <b>NAC10</b>  | ***                                                    | MYB83, MYB63                    | MYB83, MYB85, MYB46, MY63, MYB58,<br>MYB52, MYB69, KNAT  |
| <b>NAC11</b>  | ****                                                   | ****                            | NAC95                                                    |
| <b>NAC12</b>  | *                                                      | IRX1                            | MYB46, MYB83, MYB58, MYB63, IRX9, APL,<br>KNAT7          |
| <b>NAC13</b>  | RCD1                                                   | AOX1A, RCD1                     | AOX1A, RCD1, NAC88                                       |
| <b>NAC14</b>  |                                                        | ASG2                            | ASG2, ASG8, AT1G61900                                    |
| <b>NAC16</b>  |                                                        |                                 | NYE, NACA5,                                              |
| <b>NAC17</b>  |                                                        |                                 | NAC88, AT5G13610                                         |
| <b>NAC18</b>  | GAI                                                    |                                 | NAM, NAC                                                 |
| <b>NAC19</b>  | ZFHD1, TCP20,<br>CPL1, TCP8,<br>NAC32, RHA1A,<br>RHA2A | NAC32, ERD1                     | ZFHD1, TCP20, CPL1, TCP8, NAC32, RHA1A,<br>RHA2A, ERD1   |
| <b>NAC20</b>  | AT3G43430, SHR,<br>PHB, PLT2,<br>MYB59, HB23,<br>HB30  | TMO6,DOF6, SHR,<br>PLT2         | TMO6,DOF6, SHR, PLT2, AT1G64620,<br>AT3G43430            |
| <b>NAC23</b>  | ****                                                   | *****                           | NAC95, AT3G01030, AT5G27880, AT5G01860,<br>MYB64         |
| <b>NAC24</b>  | ****                                                   | *****                           | NAC95, NAC47                                             |
| <b>NAC25</b>  | ****                                                   | At1g75910, GRP20,<br>CYP86C4    | At1g75910, GRP20, CYP86C4                                |
| <b>NAC26</b>  | VND7                                                   | VND7, MYB83,<br>XCP1, AT4G08160 | VND7, MYB46, MYB85, MYB83, XCP1                          |
| <b>NAC028</b> | *****                                                  | *****                           | TOM2B, DBP1, PDLP2, TOM2A                                |
| <b>NAC29</b>  | NAC6, GRL,<br>IAA14,                                   | NAC6, HAI1                      | NAC6, HAI1, SAG12, PI                                    |
| <b>NAC32</b>  | HAI1, NAC019,<br>ABI1, NAM,<br>RVE2, PYL4              | ATAF1, HAI1,<br>NAC019, GSTU7,  | NAC102, NAM, NAC19ATAF1                                  |
| <b>NAC36</b>  | *****                                                  | AT5G52760,                      | AT5G42050                                                |

|              |                            |                                                                                                |                                                            |
|--------------|----------------------------|------------------------------------------------------------------------------------------------|------------------------------------------------------------|
|              |                            | XBAT34,<br>AT5G52750,<br>SOBIR1, RING1,<br>WRKY53,<br>WRKY46, SARD1,<br>MYB69, CIPK4,<br>ABCA8 | AT4G29770, AIP2, SDE3                                      |
| <b>NAC38</b> | BRM                        |                                                                                                |                                                            |
| <b>NAC41</b> | NAC83                      | NAC83,<br>AT1G12810                                                                            | NAC83, GSTF3, AT1G12810                                    |
| <b>NAC42</b> | ****                       | CYP71A12,<br>GSTU10,<br>AT5G38900,<br>CYP71B6                                                  | CYP71A12, GSTU10, AT5G38900,                               |
| <b>NAC44</b> | ****                       | ****                                                                                           | AT1G54890, NAC90                                           |
| <b>NAC45</b> | HB52, NAC97                | NAC97                                                                                          | CYP71B34, WAK5, NAC97                                      |
| <b>NAC46</b> | RCD1, BRM                  | CYP89A9,<br>AT4G11910                                                                          | RCD1, AT1G78040, bHLH11,                                   |
| <b>NAC47</b> | ***                        | HAI1, Rap2.6L,<br>NAC6                                                                         | NAC5, NAC24, HAI1, AT1G60380                               |
| <b>NAC48</b> | ****                       | *****                                                                                          | CYP89A9, STAY-GREEN2                                       |
| <b>NAC49</b> | ****                       | *****                                                                                          | ERF115, WOX5, LBD19                                        |
| <b>NAC50</b> | JMJ14, NAC052,<br>GAI, TPL | NAC52, JMJ14                                                                                   | JMJ14, PPR, NAC52, AT5G41650, CYP71A25                     |
| <b>NAC52</b> | JMJ14, NAC50               | JMJ14, PPR, UBP14                                                                              | JMJ14, NAC50, PPR, CRCK2, PPD6, MFDX1,<br>CYP71A25         |
| <b>NAC53</b> | ****                       | AT5G25930,<br>AT3G25610,<br>UGT73B5,                                                           | NTL, AT5G25930,                                            |
| <b>NAC55</b> | ZFHD1, HAI1,<br>F2P16.14   | ERD1, AT2G31945,<br>MYB2                                                                       | ZFHD1, ERD1, HAI1, ABF2, bZIP, MYC2                        |
| <b>NAC57</b> | *****                      | *****                                                                                          | MYB19, AT3G58090, AT1G07730,<br>AT4G13580, AT3G13650       |
| <b>NAC58</b> | *****                      | RWP1, ABCG6,<br>CYP86A1                                                                        | PPR, RWP1, ABCG6, MYB86, MYB26                             |
| <b>NAC60</b> | ****                       | OLEO1                                                                                          | NACA5, AT3G52350, RINL, AT1G65240, NTL                     |
| <b>NAC61</b> | ****                       | NAC90, ACS4,                                                                                   | NAC44, LEA, NAC85, NAC95, NAC90,                           |
| <b>NAC62</b> | ****                       | BZIP60, WRKY33,<br>TIP, SZF1, CPK32,<br>CPK28, NHL3                                            | BZIP60, WRKY33, TIP                                        |
| <b>NAC63</b> | *****                      | *****                                                                                          | LRR, NAC95, ATPMEPCRD,                                     |
| <b>NAC64</b> | *****                      | *****                                                                                          | AT3G59880, AT5G50540, AT2G44010, sks16,<br>SKS6            |
| <b>NAC66</b> | *****                      | *****                                                                                          | MYB26, MYB46, MYB83, MYB85, MYB63,<br>MYB58, KNAT7, WRKY12 |
| <b>NAC67</b> | *****                      | ****                                                                                           | NAM, AT1G78040, NAC95                                      |
| <b>NAC69</b> | ****                       | *****                                                                                          | NAC95, CYP96A2, NAM                                        |
| <b>NAC71</b> | ****                       | WNK, TM6,<br>AT1G64625                                                                         | Rap2.6L, AT2G41870, RAP2.4                                 |
| <b>NAC73</b> | ****                       | MYB46, MYB83,                                                                                  | MYB46, MYB83, IRX1, IRX3, MYB63, CESA4                     |



|               |                                                               |                                                |                                                         |
|---------------|---------------------------------------------------------------|------------------------------------------------|---------------------------------------------------------|
|               |                                                               | IRX1, IRX3,<br>CESA4                           |                                                         |
| <b>NAC74</b>  | F2P16.14,<br>TOPLESS, BRM                                     | DSEL, scpl31,<br>HXXXD type                    | SCRL20, F-ox/LLR, sks11                                 |
| <b>NAC75</b>  | RING/U-box, ZF<br>domain                                      | *****                                          | ERF16, UTr7, CML, TPL/TPR,                              |
| <b>NAC76</b>  | VND7, NAC83                                                   | ****                                           | VND7, NAC83, UBQ, MYB46                                 |
| <b>NAC77</b>  | *****                                                         | *****                                          | PIP1-5                                                  |
| <b>NAC80</b>  | BRM                                                           | *****                                          | PPR, TT7, 4CL3, BRM                                     |
| <b>NAC82</b>  | SRO1, RCD1                                                    | *****                                          | UBX, WW                                                 |
| <b>NAC83</b>  | VND7, NAC41,<br>CUC2, VND1,<br>NAC105, NAC76,<br>NAC101, NAC1 | *****                                          | VND7, NAC41, CUC2, VND1, NAC105,<br>NAC76, MYB83, MYB46 |
| <b>NAC84</b>  | ****                                                          | EDF3                                           | ZFP10, Delta9, EDF3, SPT16, GS1                         |
| <b>NAC85</b>  | ****                                                          | ****                                           | LEA, PUP4, NAC90, NAC61, XERO1                          |
| <b>NAC87</b>  | ****                                                          | ****                                           | SWAP, WRKY36, TIR-NBS, NBS-LRR,<br>BHLH11               |
| <b>NAC88</b>  | ****                                                          | ****                                           | UBC18, NAC17, NAC13, NAC53                              |
| <b>NAC89</b>  | PAS1, MYB, TI1,<br>TSPO, TIP2.2,<br>TIP3.1                    | *****                                          | PAS1, maMYB, BZIP60, BZIP28                             |
| <b>NAC90</b>  | *****                                                         | AT3G57460,<br>MPK11                            | DTA4, CHI, NAC44, NAC85, LEA                            |
| <b>NAC94</b>  | *****                                                         | *****                                          | MC5, D111, RML, BAG6, LCAT3, AATP1,<br>BZIP28           |
| <b>NAC95</b>  | *****                                                         | NAC24, NAM                                     | NAC23, NAM, NAC24, MAY64, NAC69                         |
| <b>NAC96</b>  | T21F11.18                                                     | *****                                          | ABF2, Dna-J, TOPLESS,                                   |
| <b>NAC97</b>  | NAC45, LRR,<br>BRM                                            | *****                                          | *****                                                   |
| <b>NAC100</b> | *****                                                         | *****                                          | AT4G27850, AT1G26410, GRP20, TT7, 4CL3,                 |
| <b>NAC101</b> | RPA2, VND7, VR-<br>NAC, NAC83                                 | *****                                          | NVD7, NAC83, XCP1, UBQ, RNS3                            |
| <b>NAC102</b> | ****                                                          | ATAF1, tolB,<br>NAC32, RHL41,<br>ZAT6, UGT73B2 | ATAF1, NAC32                                            |
| <b>NAC103</b> | ****                                                          | *****                                          | BZIP60, BZIP28, D111, CLPTM1, NAC44                     |
| <b>NAC105</b> | VND7, NAC83,                                                  | *****                                          | VND7, GH, NAC83, UBQ, LAC1, MYB46,<br>RIC4              |

1029

1030

1031

1032

1033

1034 Table 3

1035 Codon usage of NAC TFs in plants.

1036

| Codons  | Codon present in No. of species | Codon absent in No. of species | Average abundance of codons | Highest no. of codons | Name of the species with highest no. of codons |
|---------|---------------------------------|--------------------------------|-----------------------------|-----------------------|------------------------------------------------|
| AAA (K) | 126                             | 20                             | 4.77                        | 9.9                   | <i>Glycine soja</i>                            |
| AAG (K) | 146                             | 0                              | 10.75                       | 24.2                  | <i>Sphagnum fallax</i>                         |
| AAC (N) | 144                             | 2                              | 3.66                        | 14.2                  | <i>Beta vulgaris</i>                           |
| AAU (N) | 127                             | 19                             | 9.25                        | 20.5                  | <i>Spinacia oleracea</i>                       |
| ACA (T) | 139                             | 7                              | 2.33                        | 15.2                  | <i>Citrus sinensis</i>                         |
| ACC (T) | 137                             | 9                              | 2.4                         | 17                    | <i>Amborella trichopoda</i>                    |
| ACG (T) | 20                              | 126                            | 5.91                        | 13                    | <i>Doroceras hygrometricum</i>                 |
| ACU (T) | 146                             | 0                              | 7.42                        | 16.6                  | <i>Sesamum indicum</i>                         |
| AGA (R) | 146                             | 0                              | 10.92                       | 24.3                  | <i>Klebsormidium flaccidum</i>                 |
| AGG (R) | 146                             | 0                              | 4.12                        | 18.8                  | <i>Amborella trichopoda</i>                    |
| CGA (R) | 19                              | 127                            | 5.22                        | 13.9                  | <i>Linum usitatissimum</i>                     |
| CGC (R) | 19                              | 127                            | 2.47                        | 6                     | <i>Linum usitatissimum</i>                     |
| CGG (R) | 19                              | 127                            | 3.93                        | 8.6                   | <i>Citrullus lanatus</i>                       |
| CGU (R) | 19                              | 127                            | 2.06                        | 4.7                   | <i>Linum usitatissimum</i>                     |
| AGC (S) | 143                             | 3                              | 3.54                        | 24.2                  | <i>Beta vulgaris</i>                           |
| AGU (S) | 144                             | 2                              | 1.83                        | 5.2                   | <i>Doroceras hygrometricum</i>                 |
| UCC (S) | 141                             | 5                              | 4.51                        | 12.3                  | <i>Aegilops tauschii</i>                       |
| UCG (S) | 20                              | 126                            | 2.64                        | 6.4                   | <i>Doroceras hygrometricum</i>                 |
| UCU (S) | 146                             | 0                              | 4.65                        | 30.5                  | <i>Humulus lupulus</i>                         |
| UCA (S) | 139                             | 7                              | 5.09                        | 15.1                  | <i>Morus notabilis</i>                         |
| AUA (I) | 124                             | 22                             | 4.80                        | 15.3                  | <i>Sphagnum fallax</i>                         |
| AUC (I) | 146                             | 0                              | 5.10                        | 16.7                  | <i>Sphagnum fallax</i>                         |
| AUU (I) | 126                             | 20                             | 8.71                        | 15.9                  | <i>Spinacia oleracea</i>                       |
| AUG (M) | 146                             | 0                              | 7.81                        | 22.8                  | <i>Sphagnum fallax</i>                         |
| CAA (Q) | 146                             | 0                              | 5.31                        | 15.4                  | <i>Fragaria vesca</i>                          |
| CAG (Q) | 20                              | 126                            | 13.3                        | 22.6                  | <i>Linum usitatissimum</i>                     |
| CAC (H) | 20                              | 126                            | 6.64                        | 10.9                  | <i>Beta vulgaris</i>                           |
| CAU (H) | 144                             | 2                              | 4.45                        | 9.7                   | <i>Setaria viridis</i>                         |
| CCA (P) | 20                              | 126                            | 11.09                       | 16.3                  | <i>Doroceras hygrometricum</i>                 |
| CCC (P) | 20                              | 126                            | 14.18                       | 19.2                  | <i>Amborella trichopoda</i>                    |
| CCG (P) | 20                              | 126                            | 5.10                        | 11.1                  | <i>Doroceras hygrometricum</i>                 |
| CCU (P) | 146                             | 0                              | 8.00                        | 24.7                  | <i>Klebsormidium flaccidum</i>                 |
| CUA (L) | 143                             | 3                              | 5.83                        | 28.3                  | <i>Sphagnum fallax</i>                         |
| CUC (L) | 123                             | 23                             | 5.74                        | 23.6                  | <i>Sphagnum fallax</i>                         |
| CUG (L) | 142                             | 4                              | 5.87                        | 43.9                  | <i>Sphagnum fallax</i>                         |
| CUU (L) | 145                             | 1                              | 5.94                        | 32.6                  | <i>Sphagnum fallax</i>                         |
| UUG (L) | 125                             | 21                             | 5.94                        | 24.4                  | <i>Sphagnum fallax</i>                         |
| UAA (L) | 124                             | 22                             | 5.37                        | 17.2                  | <i>Sphagnum fallax</i>                         |
| GAA (E) | 146                             | 0                              | 4.62                        | 27                    | <i>Klebsormidium flaccidum</i>                 |
| GAG (E) | 145                             | 1                              | 5.54                        | 18.1                  | <i>Sphagnum fallax</i>                         |

|         |     |     |       |      |                                 |
|---------|-----|-----|-------|------|---------------------------------|
| GAC (D) | 145 | 1   | 5.05  | 14.9 | <i>Beta vulgaris</i>            |
| GAU (D) | 144 | 2   | 5.86  | 21.7 | <i>Spinacia oleracea</i>        |
| GCA (A) | 135 | 11  | 5.49  | 18.5 | <i>Citrus sinensis</i>          |
| GCC (A) | 130 | 16  | 5.05  | 15   | <i>Amborella trichopoda</i>     |
| GCG (A) | 20  | 126 | 4.64  | 11.2 | <i>Dorcoceras hygrometricum</i> |
| GCU (A) | 146 | 0   | 4.65  | 31.1 | <i>Setaria viridis</i>          |
| GGA (G) | 146 | 0   | 4.63  | 27.5 | <i>Setaria viridis</i>          |
| GGC (G) | 141 | 5   | 5.41  | 17.1 | <i>Amborella trichopoda</i>     |
| GGG (G) | 145 | 1   | 2.7   | 6.7  | <i>Elaeis guineensis</i>        |
| GGU (G) | 145 | 1   | 2.40  | 5.9  | <i>Elaeis guineensis</i>        |
| GUA (V) | 140 | 6   | 1.46  | 3.5  | <i>Sphagnum fallax</i>          |
| GUC (V) | 123 | 23  | 0.93  | 2    | <i>Morus notabilis</i>          |
| GUG (V) | 142 | 4   | 4.35  | 11.8 | <i>Beta vulgaris</i>            |
| GUU (V) | 143 | 3   | 5.38  | 16.6 | <i>Klebsormidium flaccidum</i>  |
| UAC (Y) | 138 | 8   | 3.84  | 10.1 | <i>Morus notabilis</i>          |
| UAU (Y) | 126 | 20  | 6.23  | 14.8 | <i>Solanum melongena</i>        |
| UGG (W) | 147 | 0   | 3.89  | 14.5 | <i>Vitis vinifera</i>           |
| UGC (C) | 143 | 3   | 5.14  | 15.6 | <i>Oropetium thomaeum</i>       |
| UGU (C) | 145 | 1   | 3.9   | 9.6  | <i>Zoysia matrella</i>          |
| UUC (F) | 146 | 0   | 4.60  | 25.4 | <i>Picea glauca</i>             |
| UUU (F) | 126 | 20  | 10.67 | 19.2 | <i>Sphagnum fallax</i>          |

---

1037

1038

1039

1040

1041

1042

1043

1044

1045

1046

1047

1048

1049

1050

1051

1052 Table 4. Substitution rate of NAC TFs of plants.

|   | A                           | T           | C           | G           | A                           | T           | C           | G           | A                              | T           | C           | G           | A                                 | T           | C           | G           |
|---|-----------------------------|-------------|-------------|-------------|-----------------------------|-------------|-------------|-------------|--------------------------------|-------------|-------------|-------------|-----------------------------------|-------------|-------------|-------------|
|   | <i>Actinidia chinensis</i>  |             |             |             | <i>Aegilops tauschii</i>    |             |             |             | <i>Aethionema arabicum</i>     |             |             |             | <i>Amaranthus hypochondriacus</i> |             |             |             |
| A | -                           | 10.6        | 4.26        | <b>10.8</b> | -                           | 10.3        | 4.7         | <b>12.3</b> | -                              | 11.4        | 4.3         | <b>10.1</b> | -                                 | 11.6        | 4.83        | <b>10.4</b> |
|   |                             | 2           |             | <b>3</b>    |                             | 6           | 1           | <b>2</b>    |                                | 3           |             | <b>5</b>    |                                   | 9           |             | <b>5</b>    |
| T | 8.34                        | -           | <b>4.34</b> | 5.38        | 7.78                        | -           | <b>4.3</b>  | 5.96        | 9.01                           | -           | <b>3.54</b> | 5.7         | 8.54                              | -           | <b>3.45</b> | 5.16        |
|   |                             |             |             |             |                             |             | <b>7</b>    |             |                                |             |             |             |                                   |             |             |             |
| C | 8.34                        | <b>10.8</b> | -           | 5.38        | 7.78                        | <b>9.62</b> | -           | 5.96        | 9.01                           | <b>9.39</b> | -           | 5.7         | 8.54                              | <b>8.35</b> | -           | 5.16        |
|   |                             | <b>3</b>    |             |             |                             |             |             |             |                                |             |             |             |                                   |             |             |             |
| G | <b>16.79</b>                | 10.6        | 4.26        | -           | <b>16.09</b>                | 10.3        | 4.7         | -           | <b>16.0</b>                    | 11.4        | 4.3         | -           | <b>17.3</b>                       | 11.6        | 4.83        | -           |
|   |                             | 2           |             |             |                             | 6           | 1           |             | <b>4</b>                       | 3           |             |             | <b>2</b>                          | 9           |             |             |
|   | <i>Amborella trichopoda</i> |             |             |             | <i>Ananas comosus</i>       |             |             |             | <i>Aquilegia coerulea</i>      |             |             |             | <i>Arabidopsis halleri</i>        |             |             |             |
| A | -                           | 3.99        | 10.9        | <b>14.1</b> | -                           | 3.73        | 10.9        | <b>15.3</b> | -                              | 11          | 4.33        | <b>11.1</b> | -                                 | 10.9        | 4.15        | <b>11.0</b> |
|   |                             |             | 8           | <b>4</b>    |                             |             | 5           | <b>6</b>    |                                |             |             | <b>1</b>    |                                   | 3           |             | <b>7</b>    |
| T | 8.17                        | -           | <b>5.41</b> | 10.7        | 7.66                        | -           | <b>5.91</b> | 10.3        | 8.67                           | -           | <b>3.44</b> | 5.32        | 8.98                              | -           | <b>3.3</b>  | 5.73        |
|   |                             |             |             |             |                             |             |             | <b>2</b>    |                                |             |             |             |                                   |             |             |             |
| C | 8.17                        | <b>1.97</b> | -           | 10.7        | 7.66                        | <b>2.01</b> | -           | 10.3        | 8.67                           | <b>8.73</b> | -           | 5.32        | 8.98                              | <b>8.71</b> | -           | 5.73        |
|   |                             |             |             |             |                             |             |             | <b>2</b>    |                                |             |             |             |                                   |             |             |             |
| G | <b>10.8</b>                 | 3.99        | 10.9        | -           | <b>11.3</b>                 | 3.73        | 10.9        | -           | <b>18.0</b>                    | 11          | 4.33        | -           | <b>17.3</b>                       | 1.93        | 4.15        | -           |
|   |                             |             | 8           |             | <b>9</b>                    |             | 5           |             | <b>9</b>                       |             |             |             | <b>4</b>                          |             |             |             |
|   | <i>Arabidopsis lyrata</i>   |             |             |             | <i>Arabidopsis thaliana</i> |             |             |             | <i>Arabis alpina</i>           |             |             |             | <i>Arachis duranensis</i>         |             |             |             |
| A | -                           | 4.03        | 10.6        | <b>14.3</b> | -                           | 4.06        | 10.4        | <b>14.8</b> | -                              | 11.0        | 4.25        | <b>10.6</b> | -                                 | 11.1        | 4.43        | <b>10.3</b> |
|   |                             |             |             | <b>5</b>    |                             |             |             | <b>6</b>    |                                | 4           |             | <b>2</b>    |                                   | 7           |             |             |
| T | 8.63                        | -           | <b>4.51</b> | 10.6        | 8.41                        | -           | <b>4.65</b> | 10.5        | 8.88                           | -           | <b>3.63</b> | 5.67        | 8.76                              | -           | <b>3.82</b> | 5.37        |
|   |                             |             |             | 4           |                             |             |             | <b>2</b>    |                                |             |             |             |                                   |             |             |             |
| C | 8.63                        | <b>1.71</b> | -           | 10.6        | 8.41                        | <b>1.82</b> | -           | 10.5        | 8.88                           | <b>9.42</b> | -           | 5.67        | 8.76                              | <b>9.62</b> | -           | 5.37        |
|   |                             |             |             | 4           |                             |             |             | <b>2</b>    |                                |             |             |             |                                   |             |             |             |
| G | <b>11.6</b>                 | 4.03        | 10.6        | -           | <b>11.8</b>                 | 4.06        | 10.4        | -           | <b>16.6</b>                    | 11.0        | 4.25        | -           | <b>16.7</b>                       | 11.1        | 4.43        | -           |
|   | <b>3</b>                    |             |             |             | <b>9</b>                    |             |             |             | <b>3</b>                       | 4           |             |             | <b>9</b>                          | 7           |             |             |
|   | <i>Arachis hypogaea</i>     |             |             |             | <i>Arachis ipaensis</i>     |             |             |             | <i>Artemisia annua</i>         |             |             |             | <i>Azadirachta indica</i>         |             |             |             |
| A | -                           | 4           | 11.0        | <b>14.2</b> | -                           | 3.93        | 10.8        | <b>14.6</b> | -                              | 10.8        | 4.08        | <b>10.9</b> | -                                 | 10.9        | 4.22        | <b>10.3</b> |
|   |                             |             | 7           | <b>1</b>    |                             |             | 5           | <b>3</b>    |                                | 5           |             | <b>3</b>    |                                   | 8           |             | <b>4</b>    |
| T | 8.16                        | -           | <b>5.53</b> | 10.2        | 8.39                        | -           | <b>4.95</b> | 10          | 8.24                           | -           | <b>4.22</b> | 5.62        | 8.91                              | -           | <b>3.82</b> | 5.6         |
|   |                             |             |             | 4           |                             |             |             |             |                                |             |             |             |                                   |             |             |             |
| C | 8.16                        | <b>2</b>    | -           | 10.2        | 8.39                        | <b>1.79</b> | -           | 10          | 8.24                           | <b>11.2</b> | -           | 5.62        | 8.91                              | <b>9.95</b> | -           | 5.6         |
|   |                             |             |             | 4           |                             |             |             |             |                                | <b>4</b>    |             |             |                                   |             |             |             |
| G | <b>11.3</b>                 | 4           | 11.0        | -           | <b>12.2</b>                 | 3.93        | 10.8        | -           | <b>16.0</b>                    | 10.8        | 4.08        | -           | <b>16.4</b>                       | 10.9        | 4.22        | -           |
|   | <b>2</b>                    |             | 7           |             | <b>8</b>                    |             | 5           |             | <b>1</b>                       | 5           |             |             | <b>4</b>                          | 8           |             |             |
|   | <i>Beta vulgaris</i>        |             |             |             | <i>Boechera stricta</i>     |             |             |             | <i>Brachypodium distachyon</i> |             |             |             | <i>Brachypodium stacei</i>        |             |             |             |
| A | -                           | 3.85        | 10.9        | <b>14.3</b> | -                           | 11.0        | 4.23        | <b>10.8</b> | -                              | 10.6        | 4.93        | <b>12.5</b> | -                                 | 10.5        | 4.96        | <b>12.6</b> |
|   |                             |             | 5           | <b>8</b>    |                             | 2           |             | <b>6</b>    |                                |             |             | <b>7</b>    |                                   | 2           |             | <b>5</b>    |
| T | 8.62                        | -           | <b>4.72</b> | 10          | 8.77                        | -           | <b>3.57</b> | 5.58        | 7.75                           | -           | <b>4.05</b> | 6.19        | 7.68                              | -           | <b>4.16</b> | 6.21        |
|   |                             |             |             |             |                             |             |             |             |                                |             |             |             |                                   |             |             |             |
| C | 8.62                        | <b>1.66</b> | -           | 10          | 8.77                        | <b>9.29</b> | -           | 5.58        | 7.75                           | <b>8.71</b> | -           | 6.19        | 7.68                              | <b>8.83</b> | -           | 6.21        |
|   |                             |             |             |             |                             |             |             |             |                                |             |             |             |                                   |             |             |             |
| G | <b>12.4</b>                 | 3.85        | 10.9        | -           | <b>17.0</b>                 | 11.0        | 4.23        | -           | <b>15.7</b>                    | 10.6        | 4.93        | -           | <b>15.6</b>                       | 10.5        | 4.96        | -           |
|   |                             |             | 5           |             | <b>9</b>                    | 2           |             |             | <b>4</b>                       |             |             |             | <b>3</b>                          | 2           |             |             |
|   | <i>Brassica napus</i>       |             |             |             | <i>Brassica oleracea</i>    |             |             |             | <i>Brassica rapa</i>           |             |             |             | <i>Cajanus cajan</i>              |             |             |             |
| A | -                           | 10.8        | 4.26        | <b>10.7</b> | -                           | 10.8        | 4.29        | <b>10.7</b> | -                              | 3.98        | 10.7        | <b>14.4</b> | -                                 | 11.3        | 4.53        | <b>10.3</b> |

|          |                           |             |             |             |                              |             |             |             |                                   |             |             |             |                                |             |             |             |
|----------|---------------------------|-------------|-------------|-------------|------------------------------|-------------|-------------|-------------|-----------------------------------|-------------|-------------|-------------|--------------------------------|-------------|-------------|-------------|
|          |                           | 3           |             | <b>1</b>    |                              | 3           |             | <b>2</b>    |                                   | 3           | <b>7</b>    |             | 1                              |             |             |             |
| <b>T</b> | 8.61                      | -           | <b>4.01</b> | 5.57        | 8.7                          | -           | <b>3.91</b> | 5.57        | 8.48                              | -           | <b>4.63</b> | 10.6        | 8.63                           | -           | <b>3.9</b>  | 5.53        |
| <b>C</b> | 8.61                      | <b>10.1</b> | -           | 5.57        | 8.7                          | <b>9.87</b> | -           | 5.57        | 8.48                              | <b>1.72</b> | -           | 10.6        | 8.63                           | <b>9.73</b> | -           | 5.53        |
| <b>G</b> | <b>16.5</b>               | 10.8        | 4.26        | -           | <b>16.7</b>                  | 10.8        | 4.29        | -           | <b>11.5</b>                       | 3.98        | 10.7        | -           | <b>16.0</b>                    | 11.3        | 4.53        | -           |
|          | <b>7</b>                  | 3           |             |             | <b>3</b>                     | 3           |             |             | <b>8</b>                          |             | 3           |             | <b>7</b>                       | 1           |             |             |
|          | <i>Camelina sativa</i>    |             |             |             | <i>Cannabis sativa</i>       |             |             |             | <i>Capsella grandiflora</i>       |             |             |             | <i>Capsella rubella</i>        |             |             |             |
| <b>A</b> | -                         | 3.88        | 10.4        | <b>14.9</b> | -                            | 11.1        | 4.35        | <b>10.4</b> | -                                 | 12.3        | 4.92        | <b>9.49</b> | -                              | 11.1        | 4.35        | <b>10.4</b> |
|          |                           |             | 4           |             |                              | 7           |             | <b>9</b>    |                                   | 4           |             |             |                                | 9           |             | <b>8</b>    |
| <b>T</b> | 8.41                      | -           | <b>4.9</b>  | 10.4        | 9.25                         | -           | <b>3.24</b> | 5.72        | 9.91                              | -           | <b>2.41</b> | 6.34        | 8.81                           | -           | <b>3.69</b> | 5.65        |
|          |                           |             |             | 6           |                              |             |             |             |                                   |             |             |             |                                |             |             |             |
| <b>C</b> | 8.41                      | <b>1.82</b> | -           | 10.4        | 9.25                         | <b>8.33</b> | -           | 5.72        | 9.91                              | <b>6.2</b>  | -           | 6.34        | 8.81                           | <b>9.48</b> | -           | 5.65        |
|          |                           |             |             | 6           |                              |             |             |             |                                   |             |             |             |                                |             |             |             |
| <b>G</b> | <b>11.9</b>               | 3.88        | 10.4        | -           | <b>16.9</b>                  | 11.1        | 4.35        | -           | <b>14.8</b>                       | 12.3        | 4.92        | -           | <b>16.3</b>                    | 11.1        | 4.35        | -           |
|          | <b>9</b>                  |             | 4           |             | <b>7</b>                     | 7           |             |             | <b>3</b>                          | 4           |             |             | <b>3</b>                       | 9           |             |             |
|          | <i>Capsicum annuum</i>    |             |             |             | <i>Carica papaya</i>         |             |             |             | <i>Castanea mollissima</i>        |             |             |             | <i>Catharanthus roseus</i>     |             |             |             |
| <b>A</b> | -                         | 10.9        | 3.95        | <b>10.8</b> | -                            | 10.4        | 4.05        | <b>11.4</b> | -                                 | 11.3        | 4.53        | <b>10.0</b> | -                              | 10.5        | 4.13        | <b>11.3</b> |
|          |                           | 5           |             |             |                              | 3           |             | <b>9</b>    |                                   | 1           |             | <b>3</b>    |                                | 4           |             | <b>5</b>    |
| <b>T</b> | 8.91                      | -           | <b>3.47</b> | 5.49        | 8.39                         | -           | <b>3.98</b> | 5.47        | 8.98                              | -           | <b>3.75</b> | 5.73        | 8.6                            | -           | <b>3.82</b> | 5.69        |
| <b>C</b> | 8.91                      | <b>9.62</b> | -           | 5.49        | 8.39                         | <b>10.2</b> | -           | 5.47        | 8.98                              | <b>9.37</b> | -           | 5.73        | 8.6                            | <b>9.76</b> | -           | 5.69        |
|          |                           |             |             |             |                              | 4           |             |             |                                   |             |             |             |                                |             |             |             |
| <b>G</b> | <b>17.5</b>               | 10.9        | 3.95        | -           | <b>17.6</b>                  | 10.4        | 4.05        | -           | <b>15.7</b>                       | 11.3        | 4.53        | -           | <b>17.1</b>                    | 10.5        | 4.13        | -           |
|          | <b>1</b>                  | 5           |             |             | <b>3</b>                     | 3           |             |             | <b>2</b>                          | 1           |             |             | <b>4</b>                       | 4           |             |             |
|          | <i>Chenopodium quinoa</i> |             |             |             | <i>Cicer arietinum</i>       |             |             |             | <i>Citrullus lanatus</i>          |             |             |             | <i>Citrus clementina</i>       |             |             |             |
| <b>A</b> | -                         | 11.2        | 4.48        | <b>10.4</b> | -                            | 4.05        | 10.9        | <b>13.8</b> | -                                 | 3.95        | 10.8        | <b>14.6</b> | -                              | 3.9         | 10.5        | <b>14.7</b> |
|          |                           |             |             | <b>6</b>    |                              |             | 1           |             |                                   |             | 2           | <b>2</b>    |                                |             | 6           | <b>2</b>    |
| <b>T</b> | 8.77                      | -           | <b>3.76</b> | 5.67        | 8.93                         | -           | <b>4.36</b> | 10.1        | 8.25                              | -           | <b>5.19</b> | 10.2        | 8.33                           | -           | <b>5.26</b> | 10.2        |
|          |                           |             |             |             |                              |             |             | 7           |                                   |             |             | 4           |                                |             |             | 9           |
| <b>C</b> | 8.77                      | <b>9.4</b>  | -           | 5.67        | 8.93                         | <b>1.62</b> | -           | 10.1        | 8.25                              | <b>1.89</b> | -           | 10.2        | 8.33                           | <b>1.94</b> | -           | 10.2        |
|          |                           |             |             |             |                              |             |             | 7           |                                   |             |             | 4           |                                |             |             | 9           |
| <b>G</b> | <b>16.1</b>               | 11.2        | 4.48        | -           | <b>12.1</b>                  | 4.05        | 10.9        | -           | <b>11.7</b>                       | 3.95        | 10.8        | -           | <b>11.9</b>                    | 3.9         | 10.5        | -           |
|          | <b>6</b>                  |             |             |             | <b>1</b>                     |             | 1           |             | <b>7</b>                          |             | 2           |             | <b>2</b>                       |             | 6           |             |
|          | <i>Citrus sinensis</i>    |             |             |             | <i>Coffea canephora</i>      |             |             |             | <i>Cucumis melo</i>               |             |             |             | <i>Cucumis sativus</i>         |             |             |             |
| <b>A</b> | -                         | 3.93        | 10.4        | <b>14.3</b> | -                            | 11.2        | 4.64        | <b>10.3</b> | -                                 | 11.3        | 4.53        | <b>10.2</b> | -                              | 4.18        | 10.9        | <b>14.1</b> |
|          |                           |             | 9           | <b>7</b>    |                              | 2           |             |             |                                   | 1           |             | <b>1</b>    |                                |             | 7           | <b>2</b>    |
| <b>T</b> | 8.39                      | -           | <b>5.72</b> | 10.1        | 8.63                         | -           | <b>4.03</b> | 5.76        | 8.5                               | -           | <b>4.07</b> | 5.39        | 8.45                           | -           | <b>4.75</b> | 10.2        |
|          |                           |             |             | 2           |                              |             |             |             |                                   |             |             |             |                                |             |             |             |
| <b>C</b> | 8.39                      | <b>2.14</b> | -           | 10.1        | 8.63                         | <b>9.75</b> | -           | 5.76        | 8.5                               | <b>10.1</b> | -           | 5.39        | 8.45                           | <b>1.81</b> | -           | 10.2        |
|          |                           |             |             | 2           |                              |             |             |             |                                   | <b>7</b>    |             |             |                                |             |             |             |
| <b>G</b> | <b>11.9</b>               | 3.93        | 10.4        | -           | <b>15.4</b>                  | 11.2        | 4.64        | -           | <b>16.0</b>                       | 11.3        | 4.53        | -           | <b>11.6</b>                    | 4.18        | 10.9        | -           |
|          | <b>1</b>                  |             | 9           |             | <b>2</b>                     | 2           |             |             | <b>9</b>                          | 1           |             |             | <b>9</b>                       |             | 7           |             |
|          | <i>Daucus carota</i>      |             |             |             | <i>Dianthus caryophyllus</i> |             |             |             | <i>Dichanthelium oligosanthes</i> |             |             |             | <i>Doroceras hygrometricum</i> |             |             |             |
| <b>A</b> | -                         | 4.04        | 10.9        | <b>13.8</b> | -                            | 3.93        | 10.7        | <b>14.2</b> | -                                 | 10.5        | 4.97        | <b>12.6</b> | -                              | 4.04        | 10.8        | <b>14.1</b> |
|          |                           |             | 9           |             |                              |             | 4           | <b>6</b>    |                                   | 5           |             | <b>6</b>    |                                |             | 5           | <b>4</b>    |
| <b>T</b> | 8.52                      | -           | <b>5.16</b> | 10.3        | 8.57                         | -           | <b>5.02</b> | 10.2        | 7.49                              | -           | <b>4.32</b> | 5.97        | 8.47                           | -           | <b>5.04</b> | 10.3        |
|          |                           |             |             | 4           |                              |             |             | 5           |                                   |             |             |             |                                |             |             |             |

1053

|                              |             |             |             |                                |             |             |             |                                 |             |             |             |                            |             |             |             |             |
|------------------------------|-------------|-------------|-------------|--------------------------------|-------------|-------------|-------------|---------------------------------|-------------|-------------|-------------|----------------------------|-------------|-------------|-------------|-------------|
| C                            | 8.52        | <b>1.89</b> | -           | 10.3                           | 8.57        | <b>1.84</b> | -           | 10.2                            | 7.49        | <b>9.16</b> | -           | 5.97                       | 8.47        | <b>1.88</b> | -           | 10.3        |
|                              |             |             |             | 4                              |             |             |             | 5                               |             |             |             |                            |             |             |             |             |
| G                            | <b>11.3</b> | 4.04        | 10.9        | -                              | <b>11.9</b> | 3.93        | 10.7        | -                               | <b>15.8</b> | 10.5        | 4.97        | -                          | <b>11.6</b> | 4.04        | 10.8        | -           |
|                              | <b>7</b>    |             | 9           |                                | <b>1</b>    |             | 4           |                                 | <b>8</b>    | 5           |             |                            | <b>2</b>    |             | 5           |             |
| <i>Elaeis guineensis</i>     |             |             |             | <i>Eragrostis tef</i>          |             |             |             | <i>Eucalyptus camaldulensis</i> |             |             |             | <i>Eucalyptus grandis</i>  |             |             |             |             |
| A                            | -           | 3.85        | 10.7        | <b>15.2</b>                    | -           | 10.7        | 4.7         | <b>11.4</b>                     | -           | 10.8        | 4.28        | <b>10.8</b>                | -           | 3.95        | 10.6        | <b>14.9</b> |
|                              |             |             | 9           | <b>8</b>                       |             |             | 2           | <b>8</b>                        |             |             | 4           | <b>1</b>                   |             |             | 8           | <b>4</b>    |
| T                            | 7.88        | -           | <b>5.23</b> | 10.6                           | 8.34        | -           | <b>3.99</b> | 6.09                            | 8.47        | -           | <b>4.13</b> | 5.7                        | 7.87        | -           | <b>5.87</b> | 10.3        |
|                              |             |             |             | 3                              |             |             |             |                                 |             |             |             |                            |             |             |             | 1           |
| C                            | 7.88        | <b>1.86</b> | -           | 10.6                           | 8.34        | <b>9.12</b> | -           | 6.09                            | 8.47        | <b>10.4</b> | -           | 5.7                        | 7.87        | <b>2.17</b> | -           | 10.3        |
|                              |             |             |             | 3                              |             |             |             |                                 |             | <b>4</b>    |             |                            |             |             |             | 1           |
| G                            | <b>11.3</b> | 3.85        | 10.7        | -                              | <b>15.7</b> | 10.7        | 4.7         | -                               | <b>16.0</b> | 10.8        | 4.28        | -                          | <b>11.4</b> | 3.95        | 10.6        | -           |
|                              | <b>3</b>    |             | 9           |                                | <b>2</b>    | 2           |             |                                 | <b>5</b>    | 4           |             |                            |             |             | 8           |             |
| <i>Eutrema salsugineum</i>   |             |             |             | <i>Fragaria vesca</i>          |             |             |             | <i>Fragaria x ananassa</i>      |             |             |             | <i>Genlisea aurea</i>      |             |             |             |             |
| A                            | -           | 11.0        | 4.27        | <b>10.6</b>                    | -           | 10.8        | 4.49        | <b>10.6</b>                     | -           | 10.2        | 4.07        | <b>11.1</b>                | -           | 10.5        | 3.98        | <b>11.5</b> |
|                              |             | 4           |             | <b>7</b>                       |             |             | 5           | <b>7</b>                        |             |             | 2           | <b>9</b>                   |             |             |             | <b>8</b>    |
| T                            | 8.8         | -           | <b>3.67</b> | 5.62                           | 8.64        | -           | <b>3.96</b> | 5.4                             | 8.26        | -           | <b>4.48</b> | 5.34                       | 9.08        | -           | <b>3.34</b> | 6.52        |
| C                            | 8.8         | <b>9.49</b> | -           | 5.62                           | 8.64        | <b>9.56</b> | -           | 5.4                             | 8.26        | <b>11.2</b> | -           | 5.34                       | 9.08        | <b>8.79</b> | -           | 6.52        |
|                              |             |             |             |                                |             |             |             |                                 |             | <b>4</b>    |             |                            |             |             |             |             |
| G                            | <b>16.7</b> | 11.0        | 4.27        | -                              | <b>17.0</b> | 10.8        | 4.49        | -                               | <b>17.3</b> | 10.2        | 4.07        | -                          | <b>16.1</b> | 10.5        | 3.98        | -           |
|                              |             | 4           |             |                                | <b>6</b>    | 5           |             |                                 | <b>2</b>    | 2           |             |                            | <b>2</b>    |             |             |             |
| <i>Glycine max</i>           |             |             |             | <i>Glycine soja</i>            |             |             |             | <i>Gossypium arboreum</i>       |             |             |             | <i>Gossypium hirsutum</i>  |             |             |             |             |
| A                            | -           | 11.4        | 4.62        | <b>10.1</b>                    | -           | 11.5        | 4.72        | <b>10.0</b>                     | -           | 11.0        | 4.39        | <b>10.5</b>                | -           | 11.0        | 4.4         | <b>10.5</b> |
|                              |             | 3           |             | <b>8</b>                       |             |             | 3           | <b>7</b>                        |             |             | 5           | <b>6</b>                   |             | 6           |             | <b>1</b>    |
| T                            | 8.78        | -           | <b>3.73</b> | 5.59                           | 8.98        | -           | <b>3.55</b> | 5.68                            | 8.64        | -           | <b>3.89</b> | 5.5                        | 8.6         | -           | <b>3.98</b> | 5.55        |
| C                            | 8.78        | <b>9.24</b> | -           | 5.59                           | 8.98        | <b>8.67</b> | -           | 5.68                            | 8.64        | <b>9.8</b>  | -           | 5.5                        | 8.6         | <b>10.0</b> | -           | 5.55        |
|                              |             |             |             |                                |             |             |             |                                 |             | <b>4</b>    |             |                            |             | <b>2</b>    |             |             |
| G                            | <b>16.0</b> | 11.4        | 4.62        | -                              | <b>15.9</b> | 11.5        | 4.72        | -                               | <b>16.5</b> | 11.0        | 4.39        | -                          | <b>16.2</b> | 11.0        | 4.4         | -           |
|                              | <b>1</b>    | 3           |             |                                | <b>2</b>    | 3           |             |                                 | <b>8</b>    | 5           |             |                            | <b>7</b>    | 6           |             |             |
| <i>Gossypium raimondii</i>   |             |             |             | <i>Helianthus annuus</i>       |             |             |             | <i>Hordeum vulgare</i>          |             |             |             | <i>Humulus lupulus</i>     |             |             |             |             |
| A                            | -           | 11.2        | 4.52        | <b>10.2</b>                    | -           | 10.3        | 4.31        | <b>10.7</b>                     | -           | 10.7        | 4.8         | <b>11.6</b>                | -           | 11.2        | 4.63        | <b>10.5</b> |
|                              |             | 8           |             | <b>2</b>                       |             |             | 9           | <b>9</b>                        |             |             | 4           | <b>1</b>                   | <b>4</b>    | 1           |             | <b>2</b>    |
| T                            | 8.85        | -           | <b>3.77</b> | 5.62                           | 8.23        | -           | <b>4.74</b> | 5.46                            | 8.41        | -           | <b>3.8</b>  | 6.48                       | 8.7         | -           | <b>3.68</b> | 5.37        |
|                              |             |             |             |                                |             |             |             |                                 |             |             | <b>2</b>    |                            |             |             |             |             |
| C                            | 8.85        | <b>9.39</b> | -           | 5.62                           | 8.23        | <b>11.4</b> | -           | 5.46                            | 8.41        | <b>8.53</b> | -           | 6.48                       | 8.7         | <b>8.92</b> | -           | 5.37        |
|                              |             |             |             |                                |             | <b>2</b>    |             |                                 |             |             |             |                            |             |             |             |             |
| G                            | <b>16.0</b> | 11.2        | 4.52        | -                              | <b>16.2</b> | 10.3        | 4.31        | -                               | <b>15.1</b> | 10.7        | 4.8         | -                          | <b>17.0</b> | 11.2        | 4.63        | -           |
|                              | <b>9</b>    | 8           |             |                                | <b>8</b>    | 9           |             |                                 | <b>2</b>    | 4           | 1           |                            | <b>6</b>    | 1           |             |             |
| <i>Ipomoea trifida</i>       |             |             |             | <i>Jatropha curcas</i>         |             |             |             | <i>Juglans regia</i>            |             |             |             | <i>Kalanchoe laxiflora</i> |             |             |             |             |
| A                            | -           | 10.7        | 4.47        | <b>10.9</b>                    | -           | 11.1        | 4.34        | <b>10.6</b>                     | -           | 11.0        | 4.4         | <b>10.8</b>                | -           | 11.5        | 4.93        | <b>9.82</b> |
|                              |             | 9           |             | <b>4</b>                       |             |             | 9           | <b>6</b>                        |             |             | 9           | <b>5</b>                   | <b>2</b>    | 2           |             |             |
| T                            | 8.33        | -           | <b>4.22</b> | 5.6                            | 8.68        | -           | <b>3.66</b> | 5.5                             | 8.45        | -           | <b>3.9</b>  | 5.64                       | 8.72        | -           | <b>4.03</b> | 5.74        |
|                              |             |             |             |                                |             |             |             |                                 |             |             | <b>3</b>    |                            |             |             |             |             |
| C                            | 8.33        | <b>10.1</b> | -           | 5.6                            | 8.68        | <b>9.44</b> | -           | 5.5                             | 8.45        | <b>9.79</b> | -           | 5.64                       | 8.72        | <b>9.4</b>  | -           | 5.74        |
|                              |             | <b>9</b>    |             |                                |             |             |             |                                 |             |             |             |                            |             |             |             |             |
| G                            | <b>16.2</b> | 10.7        | 4.47        | -                              | <b>16.8</b> | 11.1        | 4.34        | -                               | <b>16.2</b> | 11.0        | 4.4         | -                          | <b>14.9</b> | 11.5        | 4.93        | -           |
|                              | <b>7</b>    | 9           |             |                                | <b>3</b>    | 9           |             |                                 | <b>2</b>    | 9           | 5           |                            | <b>2</b>    | 2           |             |             |
| <i>Kalanchoe marnieriana</i> |             |             |             | <i>Klebsormidium flaccidum</i> |             |             |             | <i>Lactuca sativa</i>           |             |             |             | <i>Leersia perrieri</i>    |             |             |             |             |
| A                            | -           | 12.0        | 5.24        | <b>9.86</b>                    | -           | 7.73        | 4.03        | <b>13.0</b>                     | -           | 11.3        | 4.5         | <b>9.9</b>                 | -           | 10.3        | 4.57        | <b>13.2</b> |

|                                  |             |             |             |                              |             |             |             |                             |             |             |            |                           |             |             |             |             |      |
|----------------------------------|-------------|-------------|-------------|------------------------------|-------------|-------------|-------------|-----------------------------|-------------|-------------|------------|---------------------------|-------------|-------------|-------------|-------------|------|
| T                                | 9.37        | 8           | -           | <b>2.86</b>                  | 6.19        | 6.67        | -           | <b>7.19</b>                 | 5.04        | 9.13        | -          | <b>3.6</b>                | 5.91        | 7.33        | -           | <b>4.28</b> | 5.82 |
| C                                | 9.37        | <b>6.59</b> | -           | 6.19                         | 6.67        | <b>13.7</b> | -           | 5.04                        | 9.13        | <b>9.16</b> | -          | 5.91                      | 7.33        | <b>9.66</b> | -           | 5.82        |      |
| G                                | <b>14.9</b> | 12.0        | 5.24        | -                            | <b>18.2</b> | 7.73        | 4.03        | -                           | <b>15.2</b> | 11.3        | 4.5        | -                         | <b>16.7</b> | 10.3        | 4.57        | -           |      |
|                                  | <b>3</b>    | 8           |             |                              | <b>8</b>    |             |             |                             | <b>8</b>    | 9           | 7          |                           | <b>3</b>    | 1           |             |             |      |
| <i>Linum usitatissimum</i>       |             |             |             | <i>Lotus japonicus</i>       |             |             |             | <i>Malus domestica</i>      |             |             |            | <i>Manihot esculenta</i>  |             |             |             |             |      |
| A                                | -           | 3.72        | 10.3        | <b>15.8</b>                  | -           | 10.3        | 3.72        | <b>12.6</b>                 | -           | 10.6        | 4.2        | <b>11.2</b>               | -           | 11.2        | 4.54        | <b>10.4</b> |      |
| T                                | 7.89        | -           | <b>5.6</b>  | 10.0                         | 8.2         | -           | <b>3.43</b> | 5.44                        | 8.18        | -           | <b>4.1</b> | 5.24                      | 8.65        | -           | <b>3.82</b> | 5.57        |      |
| C                                | 7.89        | <b>2.01</b> | -           | 10.0                         | 8.2         | <b>9.51</b> | -           | 5.44                        | 8.18        | <b>10.5</b> | -          | 5.24                      | 8.65        | <b>9.45</b> | -           | 5.57        |      |
| G                                | <b>12.3</b> | 3.72        | 10.3        | -                            | <b>19.0</b> | 10.3        | 3.72        | -                           | <b>17.5</b> | 10.6        | 4.2        | -                         | <b>16.2</b> | 11.2        | 4.54        | -           |      |
|                                  | <b>7</b>    |             | 9           |                              | <b>7</b>    | 1           |             |                             |             | 5           | 3          |                           | <b>9</b>    | 2           |             |             |      |
| <i>Medicago truncatula</i>       |             |             |             | <i>Mimulus guttatus</i>      |             |             |             | <i>Morus notabilis</i>      |             |             |            | <i>Musa acuminata</i>     |             |             |             |             |      |
| A                                | -           | 11.2        | 4.3         | <b>10.1</b>                  | -           | 10.7        | 4.02        | <b>10.5</b>                 | -           | 11.1        | 4.5        | <b>10.6</b>               | -           | 10.9        | 4.62        | <b>10.8</b> |      |
| T                                | 8.9         | -           | <b>3.68</b> | 5.4                          | 8.91        | -           | <b>3.91</b> | 5.67                        | 8.54        | -           | <b>3.8</b> | 5.32                      | 8.14        | -           | <b>4.42</b> | 5.9         |      |
| C                                | 8.9         | <b>9.62</b> | -           | 5.4                          | 8.91        | <b>10.4</b> | -           | 5.67                        | 8.54        | <b>9.34</b> | -          | 5.32                      | 8.14        | <b>10.4</b> | -           | 5.9         |      |
| G                                | <b>16.7</b> | 11.2        | 4.3         | -                            | <b>16.5</b> | 10.7        | 4.02        | -                           | <b>17.1</b> | 11.1        | 4.5        | -                         | <b>15.0</b> | 10.9        | 4.62        | -           |      |
|                                  | <b>9</b>    | 4           |             |                              | <b>1</b>    | 2           |             |                             |             | 6           | 4          |                           | <b>5</b>    | 3           |             |             |      |
| <i>Nelumbo nucifera</i>          |             |             |             | <i>Nicotiana benthamiana</i> |             |             |             | <i>Nicotiana glauca</i>     |             |             |            | <i>Nicotiana tabacum</i>  |             |             |             |             |      |
| A                                | -           | 10.8        | 4.4         | <b>10.9</b>                  | -           | 10.8        | 4.11        | <b>10.3</b>                 | -           | 10.8        | 4.2        | <b>10.4</b>               | -           | 11.2        | 4.31        | <b>10.2</b> |      |
| T                                | 8.43        | -           | <b>4.04</b> | 5.56                         | 8.82        | -           | <b>3.89</b> | 5.38                        | 8.87        | -           | <b>3.8</b> | 5.44                      | 9.07        | -           | <b>3.57</b> | 5.55        |      |
| C                                | 8.43        | <b>9.99</b> | -           | 5.56                         | 8.82        | <b>10.2</b> | -           | 5.38                        | 8.87        | <b>9.87</b> | -          | 5.44                      | 9.07        | <b>9.28</b> | -           | 5.55        |      |
| G                                | <b>16.5</b> | 10.8        | 4.4         | -                            | <b>17.0</b> | 10.8        | 4.11        | -                           | <b>16.9</b> | 10.8        | 4.2        | -                         | <b>16.6</b> | 11.2        | 4.31        | -           |      |
|                                  | <b>5</b>    | 8           |             |                              | <b>3</b>    | 8           |             |                             | <b>8</b>    | 8           | 6          |                           | <b>9</b>    |             |             |             |      |
| <i>Nicotiana tomentosiformis</i> |             |             |             | <i>Ocimum tenuiflorum</i>    |             |             |             | <i>Oropetium thomaeum</i>   |             |             |            | <i>Oryza brachyantha</i>  |             |             |             |             |      |
| A                                | -           | 11.0        | 4.3         | <b>10.4</b>                  | -           | 11.0        | 4.32        | <b>10.5</b>                 | -           | 10.5        | 4.8        | <b>12.4</b>               | -           | 10.5        | 4.85        | <b>12.9</b> |      |
| T                                | 8.93        | -           | <b>3.64</b> | 5.43                         | 8.44        | -           | <b>4.15</b> | 5.68                        | 7.46        | -           | <b>4.5</b> | 5.93                      | 7.3         | -           | <b>4.37</b> | 5.92        |      |
| C                                | 8.93        | <b>9.36</b> | -           | 5.43                         | 8.44        | <b>10.5</b> | -           | 5.68                        | 7.46        | <b>9.97</b> | -          | 5.93                      | 7.3         | <b>9.47</b> | -           | 5.92        |      |
| G                                | <b>17.1</b> | 11.0        | 4.3         | -                            | <b>15.7</b> | 11.0        | 4.32        | -                           | <b>15.6</b> | 10.5        | 4.8        | -                         | <b>16.0</b> | 10.5        | 4.85        | -           |      |
|                                  | <b>6</b>    | 5           |             |                              | <b>4</b>    | 2           |             |                             | <b>1</b>    | 2           | 2          |                           | <b>1</b>    | 1           |             |             |      |
| <i>Oryza glaberrima</i>          |             |             |             | <i>Oryza glumaepatula</i>    |             |             |             | <i>Oryza longistaminata</i> |             |             |            | <i>Oryza meridionalis</i> |             |             |             |             |      |
| A                                | -           | 10.65       | 5.01        | <b>12.8</b>                  | -           | 10.7        | 5           | <b>12.4</b>                 | -           | 10.6        | 4.7        | <b>12.1</b>               | -           | 10.4        | 4.87        | <b>13.3</b> |      |
| T                                | 7.52        | -           | <b>4.08</b> | 6.14                         | 7.61        | -           | <b>4.18</b> | 6.16                        | 7.96        | -           | <b>4.0</b> | 6.09                      | 7.43        | -           | <b>4.1</b>  | 6.12        |      |
|                                  |             |             |             |                              |             |             |             |                             |             |             | <b>3</b>   |                           |             |             |             |             |      |

|                              |             |              |             |                             |             |             |             |                                  |             |             |            |                              |             |             |             |             |
|------------------------------|-------------|--------------|-------------|-----------------------------|-------------|-------------|-------------|----------------------------------|-------------|-------------|------------|------------------------------|-------------|-------------|-------------|-------------|
| C                            | 7.52        | <b>8.69</b>  | -           | 6.14                        | 7.61        | <b>8.96</b> | -           | 6.16                             | 7.96        | <b>9.09</b> | -          | 6.09                         | 7.43        | <b>8.79</b> | -           | 6.12        |
| G                            | <b>15.7</b> | 10.65        | 5.01        | -                           | <b>15.4</b> | 10.7        | 5           | -                                | <b>15.8</b> | 10.6        | 4.7        | -                            | <b>16.1</b> | 10.4        | 4.87        | -           |
|                              | <b>3</b>    |              |             |                             | <b>2</b>    | 1           |             |                                  | <b>2</b>    | 9           | 4          |                              | <b>4</b>    | 2           |             |             |
| <i>Oryza nivara</i>          |             |              |             | <i>Oryza punctata</i>       |             |             |             | <i>Oryza rufipogon</i>           |             |             |            | <i>Oryza sativa</i>          |             |             |             |             |
| A                            | -           | 10.64        | 5.01        | <b>12.4</b>                 | -           | 10.7        | 4.94        | <b>12.3</b>                      | -           | 10.6        | 5.0        | <b>12.8</b>                  | -           | 10.8        | 5.12        | <b>12.2</b> |
|                              |             |              |             | <b>9</b>                    |             | 1           |             | <b>7</b>                         |             | 7           | 4          | <b>4</b>                     |             | 6           |             | <b>2</b>    |
| T                            | 7.6         | -            | <b>4.25</b> | 6.17                        | 7.66        | -           | <b>4.2</b>  | 6.23                             | 7.47        | -           | <b>4.1</b> | 6.18                         | 7.64        | -           | <b>4.21</b> | 6.33        |
|                              |             |              |             |                             |             |             |             |                                  |             |             | <b>4</b>   |                              |             |             |             |             |
| C                            | 7.6         | <b>9.01</b>  | -           | 6.17                        | 7.66        | <b>9.12</b> | -           | 6.23                             | 7.47        | <b>8.76</b> | -          | 6.18                         | 7.64        | <b>8.94</b> | -           | 6.33        |
| G                            | <b>15.3</b> | 10.6         | 5.01        | -                           | <b>15.2</b> | 10.7        | 4.94        | -                                | <b>15.5</b> | 10.6        | 5.0        | -                            | <b>17.7</b> | 10.8        | 5.12        | -           |
|                              | <b>9</b>    |              |             |                             | <b>2</b>    | 1           |             |                                  | <b>3</b>    | 7           | 4          |                              | <b>3</b>    | 6           |             |             |
| <i>Panicum hallii</i>        |             |              |             | <i>Panicum virgatum</i>     |             |             |             | <i>Petunia axillaris</i>         |             |             |            | <i>Petunia inflata</i>       |             |             |             |             |
| A                            | -           | 10.66        | 5           | <b>12.6</b>                 | -           | 10.4        | 5.02        | <b>12.7</b>                      | -           | 10.0        | 4.1        | <b>10.0</b>                  | -           | 11.1        | 4.28        | <b>10.2</b> |
|                              |             |              |             | <b>3</b>                    |             |             |             | <b>2</b>                         |             | 3           | 8          | <b>7</b>                     |             | 3           |             | <b>8</b>    |
| T                            | 7.75        | -            | <b>3.97</b> | 6.32                        | 7.53        | -           | <b>4.39</b> | 6.14                             | 8.77        | -           | <b>4.0</b> | 5.35                         | 8.83        | -           | <b>3.79</b> | 5.41        |
|                              |             |              |             |                             |             |             |             |                                  |             |             | <b>5</b>   |                              |             |             |             |             |
| C                            | 7.75        | <b>8.47</b>  | -           | 6.32                        | 7.53        | <b>9.12</b> | -           | 6.14                             | 8.77        | <b>10.6</b> | -          | 5.35                         | 8.83        | <b>9.86</b> | -           | 5.41        |
|                              |             |              |             |                             |             |             |             |                                  |             | <b>8</b>    |            |                              |             |             |             |             |
| G                            | <b>15.4</b> | 10.66        | 5           | -                           | <b>15.6</b> | 10.4        | 5.02        | -                                | <b>16.5</b> | 10.0        | 4.1        | -                            | <b>16.7</b> | 11.1        | 4.28        | -           |
|                              | <b>8</b>    |              |             |                             |             |             |             |                                  | <b>2</b>    | 3           | 8          |                              | <b>7</b>    | 3           |             |             |
| <i>Phaselous vulgaris</i>    |             |              |             | <i>Phoenix dactylifera</i>  |             |             |             | <i>Phyllostachys heterocycla</i> |             |             |            | <i>Physcomitrella patens</i> |             |             |             |             |
| A                            | -           | 11.4         | 4.62        | <b>10.2</b>                 | -           | 10.7        | 4.44        | <b>11.1</b>                      | -           | 11.0        | 4.9        | <b>11.6</b>                  | -           | 10.6        | 4.64        | <b>10.7</b> |
|                              |             |              |             | <b>4</b>                    |             | 1           |             | <b>6</b>                         |             | 3           | 7          |                              |             | 1           |             | <b>7</b>    |
| T                            | 8.75        | -            | <b>3.78</b> | 5.69                        | 8.2         | -           | <b>4.31</b> | 5.71                             | 8.1         | -           | <b>3.9</b> | 6.27                         | 8.1         | -           | <b>4.77</b> | 5.53        |
|                              |             |              |             |                             |             |             |             |                                  |             |             | <b>4</b>   |                              |             |             |             |             |
| C                            | 8.75        | <b>9.32</b>  | -           | 5.69                        | 8.2         | <b>10.3</b> | -           | 5.71                             | 8.1         | <b>8.73</b> | -          | 6.27                         | 8.1         | <b>10.9</b> | -           | 5.53        |
|                              |             |              |             |                             |             | <b>9</b>    |             |                                  |             |             |            |                              |             | <b>2</b>    |             |             |
| G                            | <b>15.7</b> | 11.4         | 4.62        | -                           | <b>16.0</b> | 10.7        | 4.44        | -                                | <b>14.9</b> | 11.0        | 4.9        | -                            | <b>15.7</b> | 10.6        | 4.64        | -           |
|                              | <b>5</b>    |              |             |                             |             | 1           |             |                                  | <b>9</b>    | 3           | 7          |                              | <b>7</b>    | 1           |             |             |
| <i>Picea abies</i>           |             |              |             | <i>Picea glauca</i>         |             |             |             | <i>Picea sitchensis</i>          |             |             |            | <i>Pinus taeda</i>           |             |             |             |             |
| A                            | -           | 10.82        | 4.54        | <b>10.2</b>                 | -           | 10.8        | 4.61        | <b>10.3</b>                      | -           | 10.3        | 4.4        | <b>10.5</b>                  | -           | 10.0        | 4.37        | <b>11.6</b> |
|                              |             |              |             | <b>9</b>                    |             | 5           |             | <b>5</b>                         |             | 5           | 5          | <b>8</b>                     |             | 8           |             | <b>7</b>    |
| T                            | 8.53        | -            | <b>4.42</b> | 5.48                        | 8.42        | -           | <b>4.47</b> | 5.42                             | 8.02        | -           | <b>5.1</b> | 5.12                         | 8.18        | -           | <b>4.39</b> | 5.35        |
|                              |             |              |             |                             |             |             |             |                                  |             |             | <b>1</b>   |                              |             |             |             |             |
| C                            | 8.53        | <b>10.53</b> | -           | 5.48                        | 8.42        | <b>10.5</b> | -           | 5.42                             | 8.02        | <b>11.8</b> | -          | 5.12                         | 8.18        | <b>10.1</b> | -           | 5.35        |
|                              |             |              |             |                             |             | <b>2</b>    |             |                                  |             | <b>7</b>    |            |                              |             | <b>1</b>    |             |             |
| G                            | <b>16</b>   | 10.82        | 4.54        | -                           | <b>16.0</b> | 10.8        | 4.61        | -                                | <b>16.5</b> | 10.3        | 4.4        | -                            | <b>17.8</b> | 10.0        | 4.37        | -           |
|                              |             |              |             |                             | <b>8</b>    | 5           |             |                                  | <b>6</b>    | 5           | 5          |                              | <b>6</b>    | 8           |             |             |
| <i>Populus euphratica</i>    |             |              |             | <i>Populus trichocarpa</i>  |             |             |             | <i>Prunus mume</i>               |             |             |            | <i>Prunus persica</i>        |             |             |             |             |
| A                            | -           | 10.86        | 4.53        | <b>10.8</b>                 | -           | 10.9        | 4.52        | <b>10.6</b>                      | -           | 11.1        | 4.4        | <b>10.6</b>                  | -           | 11.3        | 4.53        | <b>10.2</b> |
|                              |             |              |             | <b>5</b>                    |             | 8           |             | <b>8</b>                         |             | 2           | 3          | <b>5</b>                     |             | 8           |             | <b>3</b>    |
| T                            | 8.33        | -            | <b>4.15</b> | 5.31                        | 8.47        | -           | <b>4.01</b> | 5.35                             | 8.91        | -           | <b>3.4</b> | 5.55                         | 8.95        | -           | <b>3.55</b> | 5.6         |
|                              |             |              |             |                             |             |             |             |                                  |             |             | <b>9</b>   |                              |             |             |             |             |
| C                            | 8.33        | <b>9.95</b>  | -           | 5.31                        | 8.47        | <b>9.74</b> | -           | 5.35                             | 8.91        | <b>8.76</b> | -          | 5.55                         | 8.95        | <b>8.92</b> | -           | 5.6         |
| G                            | <b>17</b>   | 10.86        | 4.53        | -                           | <b>16.9</b> | 10.9        | 4.52        | -                                | <b>17.0</b> | 11.1        | 4.4        | -                            | <b>16.3</b> | 11.3        | 4.53        | -           |
|                              |             |              |             |                             | <b>3</b>    | 8           |             |                                  | <b>7</b>    | 2           | 3          |                              | <b>6</b>    | 8           |             |             |
| <i>Pseudotsuga menziesii</i> |             |              |             | <i>Pyrus bretschneideri</i> |             |             |             | <i>Raphanus raphanistrum</i>     |             |             |            | <i>Raphanus sativus</i>      |             |             |             |             |
| A                            | -           | 10.74        | 4.44        | <b>9.98</b>                 | -           | 11.1        | 4.51        | <b>10.7</b>                      | -           | 11.0        | 4.4        | <b>10.5</b>                  | -           | 10.9        | 4.35        | <b>10.7</b> |
|                              |             |              |             |                             |             |             |             | <b>8</b>                         |             | 7           |            | <b>1</b>                     |             | 6           |             | <b>1</b>    |



1056

|   |              |              |             |      |              |             |             |      |              |            |             |     |              |              |             |      |
|---|--------------|--------------|-------------|------|--------------|-------------|-------------|------|--------------|------------|-------------|-----|--------------|--------------|-------------|------|
| T | 8.49         | -            | <b>4.79</b> | 5.68 | 8.57         | -           | <b>3.77</b> | 5.47 | 8.72         | -          | <b>3.85</b> | 5.6 | 8.47         | -            | <b>4.06</b> | 5.52 |
| C | 8.49         | <b>11.59</b> | -           | 5.68 | 8.57         | <b>9.26</b> | -           | 5.47 | 8.72         | <b>9.7</b> | -           | 5.6 | 8.47         | <b>10.23</b> | -           | 5.52 |
| G | <b>14.93</b> | 10.74        | 4.44        | -    | <b>16.89</b> | 11.1        | 4.51        | -    | <b>16.36</b> | 11.0       | 4.4         | -   | <b>16.44</b> | 10.9         | 4.35        | -    |

| <i>Ricinus communis</i> |              |             |             | <i>Saccharum officinarum</i> |              |             |             | <i>Salix purpurea</i> |              |              |             | <i>Salvia miltiorrhiza</i> |              |             |             |              |
|-------------------------|--------------|-------------|-------------|------------------------------|--------------|-------------|-------------|-----------------------|--------------|--------------|-------------|----------------------------|--------------|-------------|-------------|--------------|
| A                       | -            | 10.87       | 4.28        | <b>11.05</b>                 | -            | 9.95        | 4.48        | <b>12.78</b>          | -            | 10.8         | 4.5         | <b>10.98</b>               | -            | 11.2        | 4.64        | <b>10.63</b> |
| T                       | 8.56         | -           | <b>3.76</b> | 5.48                         | 8.25         | -           | <b>3.94</b> | 6.61                  | 8.24         | -            | <b>4.16</b> | 5.32                       | 8.49         | -           | <b>3.89</b> | 5.7          |
| C                       | 8.56         | <b>3.76</b> | -           | 5.48                         | 8.25         | <b>8.76</b> | -           | 6.61                  | 8.24         | <b>10.04</b> | -           | 5.32                       | 8.49         | <b>9.44</b> | -           | 5.7          |
| G                       | <b>17.27</b> | 10.87       | 4.28        | -                            | <b>15.95</b> | 9.95        | 4.48        | -                     | <b>17.01</b> | 10.8         | 4.5         | -                          | <b>15.82</b> | 11.2        | 4.64        | -            |

| <i>Selaginella moellendorffii</i> |              |             |             | <i>Sesamum indicum</i> |              |             |             | <i>Setaria italica</i> |              |             |             | <i>Setaria viridis</i> |              |             |             |              |
|-----------------------------------|--------------|-------------|-------------|------------------------|--------------|-------------|-------------|------------------------|--------------|-------------|-------------|------------------------|--------------|-------------|-------------|--------------|
| A                                 | -            | 10.76       | 4.13        | <b>11.65</b>           | -            | 11.3        | 4.82        | <b>10.17</b>           | -            | 10.8        | 5.1         | <b>12.29</b>           | -            | 10.6        | 5.05        | <b>12.45</b> |
| T                                 | 8.65         | -           | <b>3.52</b> | 6.3                    | 8.63         | -           | <b>4.03</b> | 5.65                   | 7.69         | -           | <b>4.12</b> | 6.22                   | 7.67         | -           | <b>4.22</b> | 6.1          |
| C                                 | 8.65         | <b>9.15</b> | -           | 6.3                    | 8.63         | <b>9.45</b> | -           | 5.65                   | 7.69         | <b>8.67</b> | -           | 6.22                   | 7.67         | <b>8.87</b> | -           | 6.1          |
| G                                 | <b>16.01</b> | 10.76       | 4.13        | -                      | <b>15.54</b> | 11.3        | 4.82        | -                      | <b>15.19</b> | 10.8        | 5.1         | -                      | <b>15.65</b> | 10.6        | 5.05        | -            |

| <i>Sisymbrium irio</i> |              |             |             | <i>Solanum lycopersicum</i> |              |            |             | <i>Solanum melongena</i> |              |              |             | <i>Solanum pennellii</i> |              |             |            |              |
|------------------------|--------------|-------------|-------------|-----------------------------|--------------|------------|-------------|--------------------------|--------------|--------------|-------------|--------------------------|--------------|-------------|------------|--------------|
| A                      | -            | 10.74       | 4.29        | <b>11.05</b>                | -            | 11.1       | 4.12        | <b>10.13</b>             | -            | 10.7         | 4.0         | <b>10.67</b>             | -            | 11.0        | 4.11       | <b>10.25</b> |
| T                      | 8.45         | -           | <b>3.96</b> | 5.37                        | 9.1          | -          | <b>3.58</b> | 5.45                     | 8.67         | -            | <b>3.95</b> | 5.3                      | 8.96         | -           | <b>3.7</b> | 5.39         |
| C                      | 8.45         | <b>9.91</b> | -           | 5.37                        | 9.1          | <b>9.7</b> | -           | 5.45                     | 8.67         | <b>10.48</b> | -           | 5.3                      | 8.96         | <b>9.95</b> | -          | 5.39         |
| G                      | <b>17.37</b> | 10.74       | 4.29        | -                           | <b>16.97</b> | 11.1       | 4.12        | -                        | <b>17.46</b> | 10.7         | 4.0         | -                        | <b>17.03</b> | 11.0        | 4.11       | -            |

| <i>Solanum pimpinellifolium</i> |              |             |             | <i>Solanum tuberosum</i> |              |              |             | <i>Sorghum bicolor</i> |              |             |             | <i>Sphagnum fallax</i> |           |              |             |              |
|---------------------------------|--------------|-------------|-------------|--------------------------|--------------|--------------|-------------|------------------------|--------------|-------------|-------------|------------------------|-----------|--------------|-------------|--------------|
| A                               | -            | 11.4        | 4.23        | <b>9.8</b>               | -            | 10.9         | 4.13        | <b>10.34</b>           | -            | 10.6        | 5.0         | <b>12.24</b>           | -         | 10.9         | 4.92        | <b>10.65</b> |
| T                               | 9.3          | -           | <b>3.48</b> | 5.58                     | 8.83         | -            | <b>3.86</b> | 5.38                   | 7.76         | -           | <b>4.23</b> | 6.21                   | 8.03      | -            | <b>4.69</b> | 5.7          |
| C                               | 9.3          | <b>9.38</b> | -           | 5.58                     | 8.83         | <b>10.24</b> | -           | 5.38                   | 7.76         | <b>8.88</b> | -           | 6.21                   | 8.03      | <b>10.44</b> | -           | 5.7          |
| G                               | <b>16.33</b> | 11.4        | 4.23        | -                        | <b>16.98</b> | 10.9         | 4.13        | -                      | <b>15.31</b> | 10.6        | 5.0         | -                      | <b>15</b> | 10.9         | 4.92        | -            |

| <i>Spinacia oleracea</i> |      |             |             | <i>Spirodela polyrhiza</i> |      |             |             | <i>Tarenaya hassleriana</i> |      |             |             | <i>Thellungiella parvula</i> |             |            |            |              |
|--------------------------|------|-------------|-------------|----------------------------|------|-------------|-------------|-----------------------------|------|-------------|-------------|------------------------------|-------------|------------|------------|--------------|
| A                        | -    | 11.37       | 4.57        | <b>10.2</b>                | -    | 11.0        | 4.84        | <b>10.69</b>                | -    | 11.0        | 4.5         | <b>10.66</b>                 | -           | 11.3       | 4.46       | <b>10.21</b> |
| T                        | 8.74 | -           | <b>3.76</b> | 5.4                        | 8.45 | -           | <b>4.21</b> | 6.38                        | 8.73 | -           | <b>3.81</b> | 5.81                         | 8.69        | -          | <b>3.9</b> | 5.62         |
| C                        | 8.74 | <b>9.35</b> | -           | 5.4                        | 8.45 | <b>9.59</b> | -           | 6.38                        | 8.73 | <b>9.31</b> | -           | 5.81                         | <b>8.69</b> | <b>9.9</b> | -          | 5.62         |

|                          |             |              |             |                           |             |             |             |                          |             |             |            |                          |             |             |             |             |
|--------------------------|-------------|--------------|-------------|---------------------------|-------------|-------------|-------------|--------------------------|-------------|-------------|------------|--------------------------|-------------|-------------|-------------|-------------|
| G                        | <b>16.5</b> | 11.37        | 4.57        | -                         | <b>14.1</b> | 11.0        | 4.84        | -                        | <b>16.0</b> | 11.0        | 4.5        | -                        | <b>15.7</b> | 11.3        | 4.46        | -           |
|                          | <b>1</b>    |              |             |                           | <b>6</b>    | 1           |             |                          | <b>2</b>    | 5           | 2          |                          | <b>8</b>    | 4           |             |             |
| <i>Theobroma cacao</i>   |             |              |             | <i>Trifolium pratense</i> |             |             |             | <i>Triticum aestivum</i> |             |             |            | <i>Triticum urartu</i>   |             |             |             |             |
| A                        | -           | 11.04        | 4.45        | <b>10.5</b>               | -           | 11.2        | 4.26        | <b>9.73</b>              | -           | 10.6        | 4.8        | <b>11.2</b>              | -           | 10.7        | 4.94        | <b>11.4</b> |
|                          |             |              |             | <b>2</b>                  |             | 1           |             |                          |             | 5           | 5          |                          |             | 8           |             |             |
| T                        | 8.53        | -            | <b>4.04</b> | 5.43                      | 9.05        | -           | <b>3.89</b> | 5.43                     | 8.28        | -           | <b>4.3</b> | 6.16                     | 8.12        | -           | <b>4.27</b> | 6.19        |
|                          |             |              |             |                           |             |             |             |                          |             |             | <b>4</b>   |                          |             |             |             |             |
| C                        | 8.53        | <b>10.02</b> | -           | 5.43                      | 9.05        | <b>10.2</b> | -           | 5.43                     | 8.28        | <b>9.54</b> | -          | 6.16                     | 8.12        | <b>9.32</b> | -           | 6.19        |
|                          |             |              |             |                           |             | <b>4</b>    |             |                          |             |             |            |                          |             |             |             |             |
| G                        | <b>16.5</b> | 11.04        | 4.45        | -                         | <b>16.2</b> | 11.2        | 4.26        | -                        | <b>15.0</b> | 10.6        | 4.8        | -                        | <b>14.9</b> | 10.7        | 4.94        | -           |
|                          | <b>3</b>    |              |             |                           | <b>4</b>    | 1           |             |                          | <b>4</b>    | 5           | 5          |                          | <b>5</b>    | 8           |             |             |
| <i>Utricularia gibba</i> |             |              |             | <i>Vigna angularis</i>    |             |             |             | <i>Vigna radiata</i>     |             |             |            | <i>Vigna unguiculata</i> |             |             |             |             |
| A                        | -           | 10.97        | 4.56        | <b>10.6</b>               | -           | 11.1        | 4.45        | <b>10.4</b>              | -           | 10.7        | 4.3        | <b>10.6</b>              | -           | 10.2        | 3.95        | <b>11.1</b> |
|                          |             |              |             | <b>7</b>                  |             | 8           |             |                          |             | 6           | 3          | <b>4</b>                 |             | 1           |             | <b>1</b>    |
| T                        | 8.41        | -            | <b>4.26</b> | 6                         | 8.87        | -           | <b>3.72</b> | 5.74                     | 8.58        | -           | <b>4.1</b> | 5.59                     | 8.54        | -           | <b>4.35</b> | 5.86        |
|                          |             |              |             |                           |             |             |             |                          |             |             | <b>6</b>   |                          |             |             |             |             |
| C                        | 8.41        | <b>10.23</b> | -           | 6                         | 8.87        | <b>9.34</b> | -           | 5.74                     | 8.58        | <b>10.3</b> | -          | 5.59                     | 8.54        | <b>11.2</b> | -           | 5.86        |
|                          |             |              |             |                           |             |             |             |                          |             | <b>4</b>    |            |                          |             | <b>4</b>    |             |             |
| G                        | <b>14.9</b> | 10.97        | 4.56        | -                         | <b>16.0</b> | 11.1        | 4.45        | -                        | <b>16.3</b> | 10.7        | 4.3        | -                        | <b>16.1</b> | 10.2        | 3.95        | -           |
|                          | <b>6</b>    |              |             |                           | <b>8</b>    | 8           |             |                          | <b>3</b>    | 6           | 3          |                          | <b>9</b>    | 1           |             |             |
| <i>Vitis vinifera</i>    |             |              |             | <i>Zea mays</i>           |             |             |             | <i>Ziziphus jujuba</i>   |             |             |            | <i>Zoysia japonica</i>   |             |             |             |             |
| A                        | -           | 11.27        | 4.64        | <b>10.2</b>               | -           | 10.7        | 5.14        | <b>12.1</b>              | -           | 11.0        | 5.5        | <b>10.7</b>              | -           | 10.8        | 5.02        | <b>12.0</b> |
|                          |             |              |             | <b>1</b>                  |             | 7           |             |                          |             | 3           | 4          | <b>1</b>                 |             | 3           |             | <b>8</b>    |
| T                        | 8.69        | -            | <b>3.98</b> | 5.74                      | 7.82        | -           | <b>4.15</b> | 6.34                     | 8.6         | -           | <b>3.8</b> | 5.47                     | 7.87        | -           | <b>4.04</b> | 6.18        |
|                          |             |              |             |                           |             |             |             |                          |             |             | <b>4</b>   |                          |             |             |             |             |
| C                        | 8.69        | <b>9.68</b>  | -           | 5.74                      | 7.82        | <b>8.69</b> | -           | 6.34                     | 8.6         | <b>9.33</b> | -          | 5.47                     | 7.87        | <b>8.72</b> | -           | 6.18        |
| G                        | <b>15.4</b> | 11.27        | 4.64        | -                         | <b>14.9</b> | 10.7        | 5.14        | -                        | <b>16.8</b> | 11.0        | 5.5        | -                        | <b>15.3</b> | 10.8        | 5.02        | -           |
|                          | <b>5</b>    |              |             |                           | <b>1</b>    | 7           |             |                          | <b>4</b>    | 3           | 4          |                          | <b>8</b>    | 3           |             |             |
| <i>Zoysia matrella</i>   |             |              |             | <i>Zoysia pacifica</i>    |             |             |             |                          |             |             |            |                          |             |             |             |             |
| A                        | -           | 10.65        | 5           | <b>12.2</b>               | -           | 10.4        | 4.88        | <b>12.6</b>              |             |             |            |                          |             |             |             |             |
|                          |             |              |             | <b>9</b>                  |             | 1           |             | <b>7</b>                 |             |             |            |                          |             |             |             |             |
| T                        | 7.73        | -            | <b>4.21</b> | 6.11                      | 7.57        | -           | <b>4.35</b> | 6.04                     |             |             |            |                          |             |             |             |             |
| C                        | 7.73        | <b>8.98</b>  | -           | 6.11                      | 7.57        | <b>9.28</b> | -           | 6.04                     |             |             |            |                          |             |             |             |             |
| G                        | <b>15.5</b> | 10.65        | 5           | -                         | <b>18.8</b> | 10.4        | 4.88        | -                        |             |             |            |                          |             |             |             |             |
|                          | <b>4</b>    |              |             |                           | <b>9</b>    | 1           |             |                          |             |             |            |                          |             |             |             |             |

1057

1058

1059

1060

1061

1062

1063 **Supplementary Data**1064 **Supplementary Table 1**

1065 Supplementary table showing different chimeric domains of NAC TFs.

1066 **Supplementary Table 2**

1067 NAC TFs showing the presence of novel functional domain along with NAC domains.

1068 **Supplementary Table 3**

1069 NAC TFs showing their involvement in different pathways and biological process.

1070

1071

1072

1073

1074

1075

1076

1077

1078

1079

1080

1081

1082

1083

1084

1085

1086

1087

1088

## Distribution of molecular weight (kDa) of NAC TFs

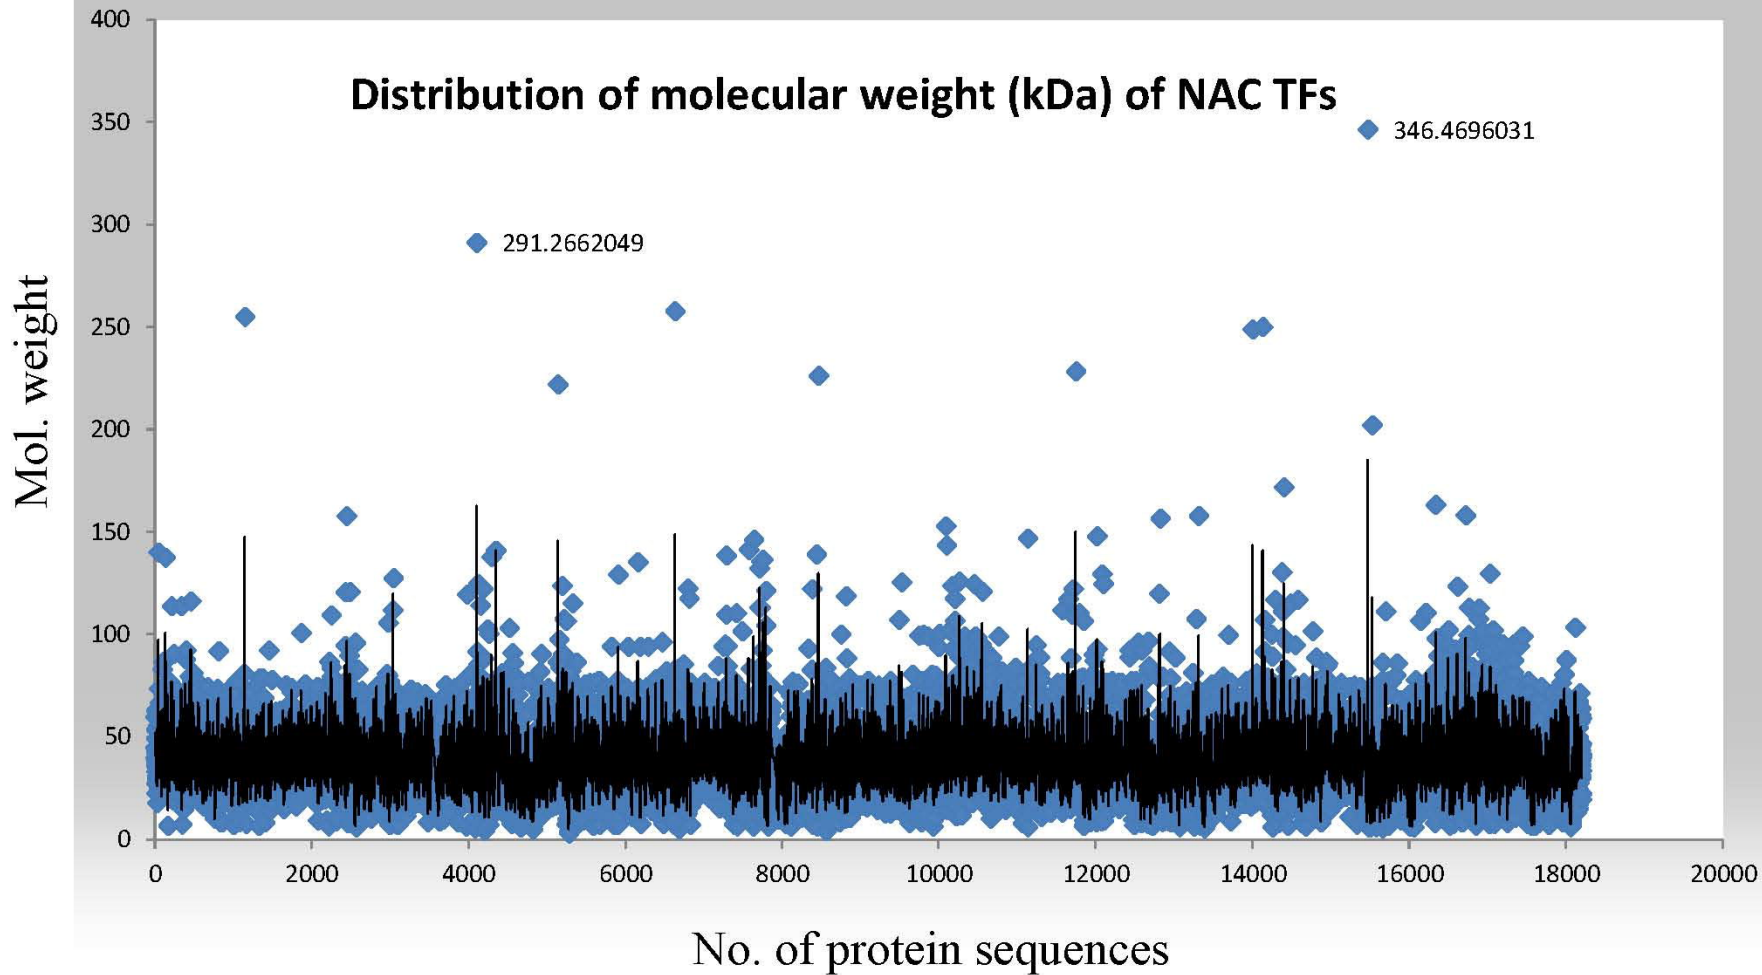

# Distribution of isoelectric points ( $pI$ ) of NAC TFs

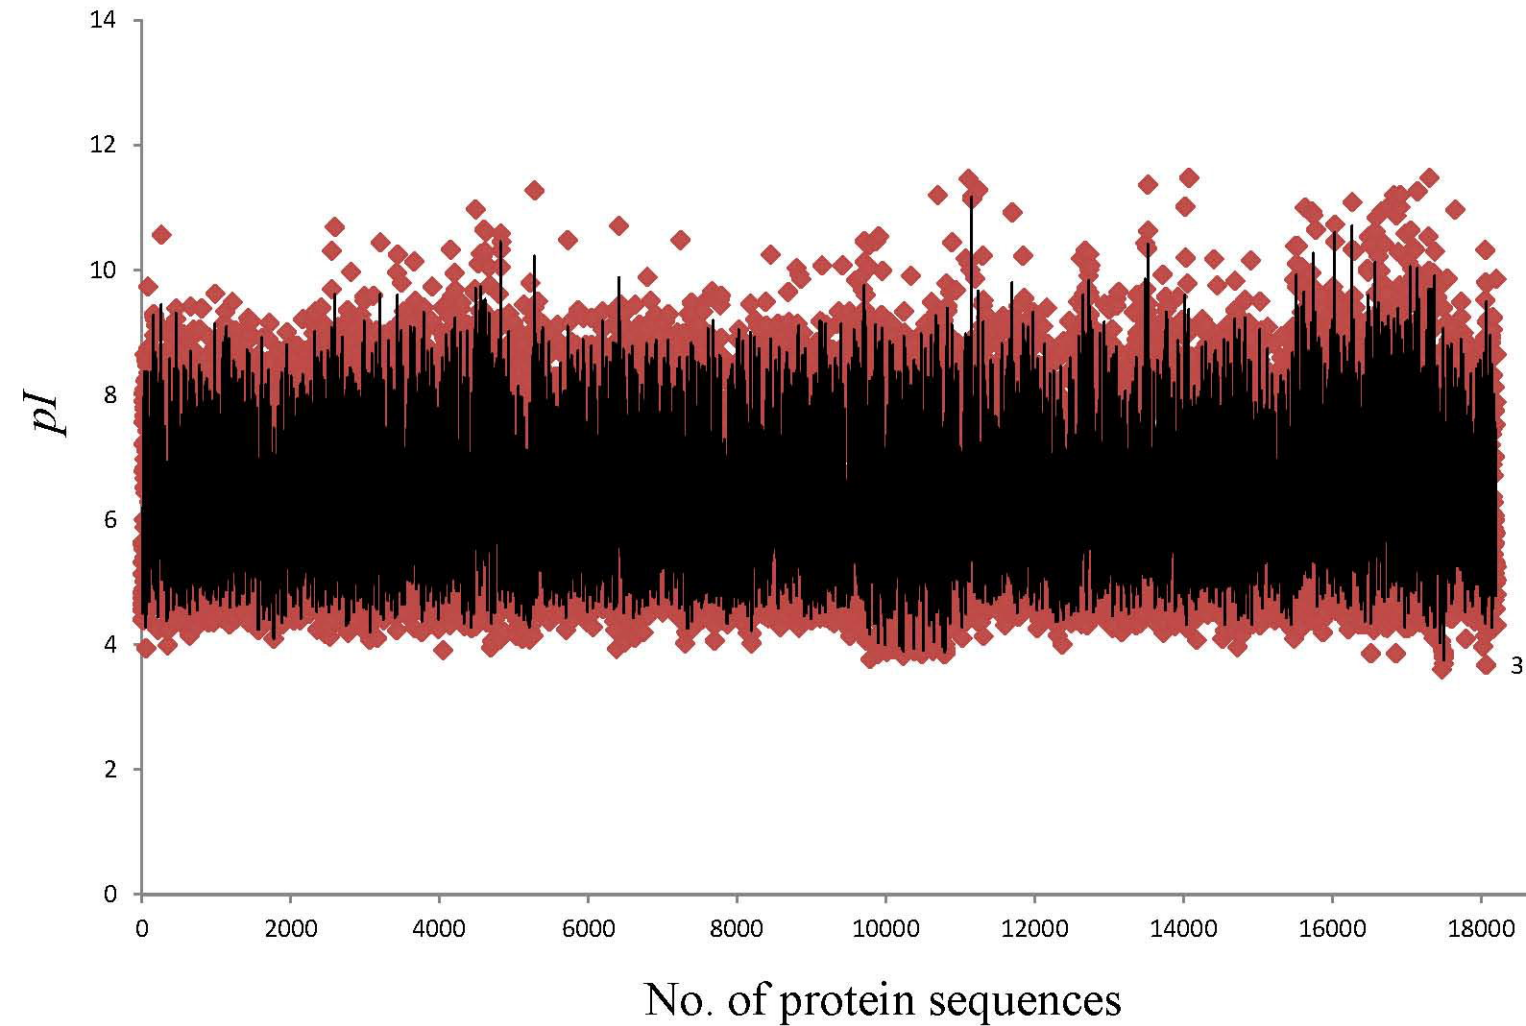

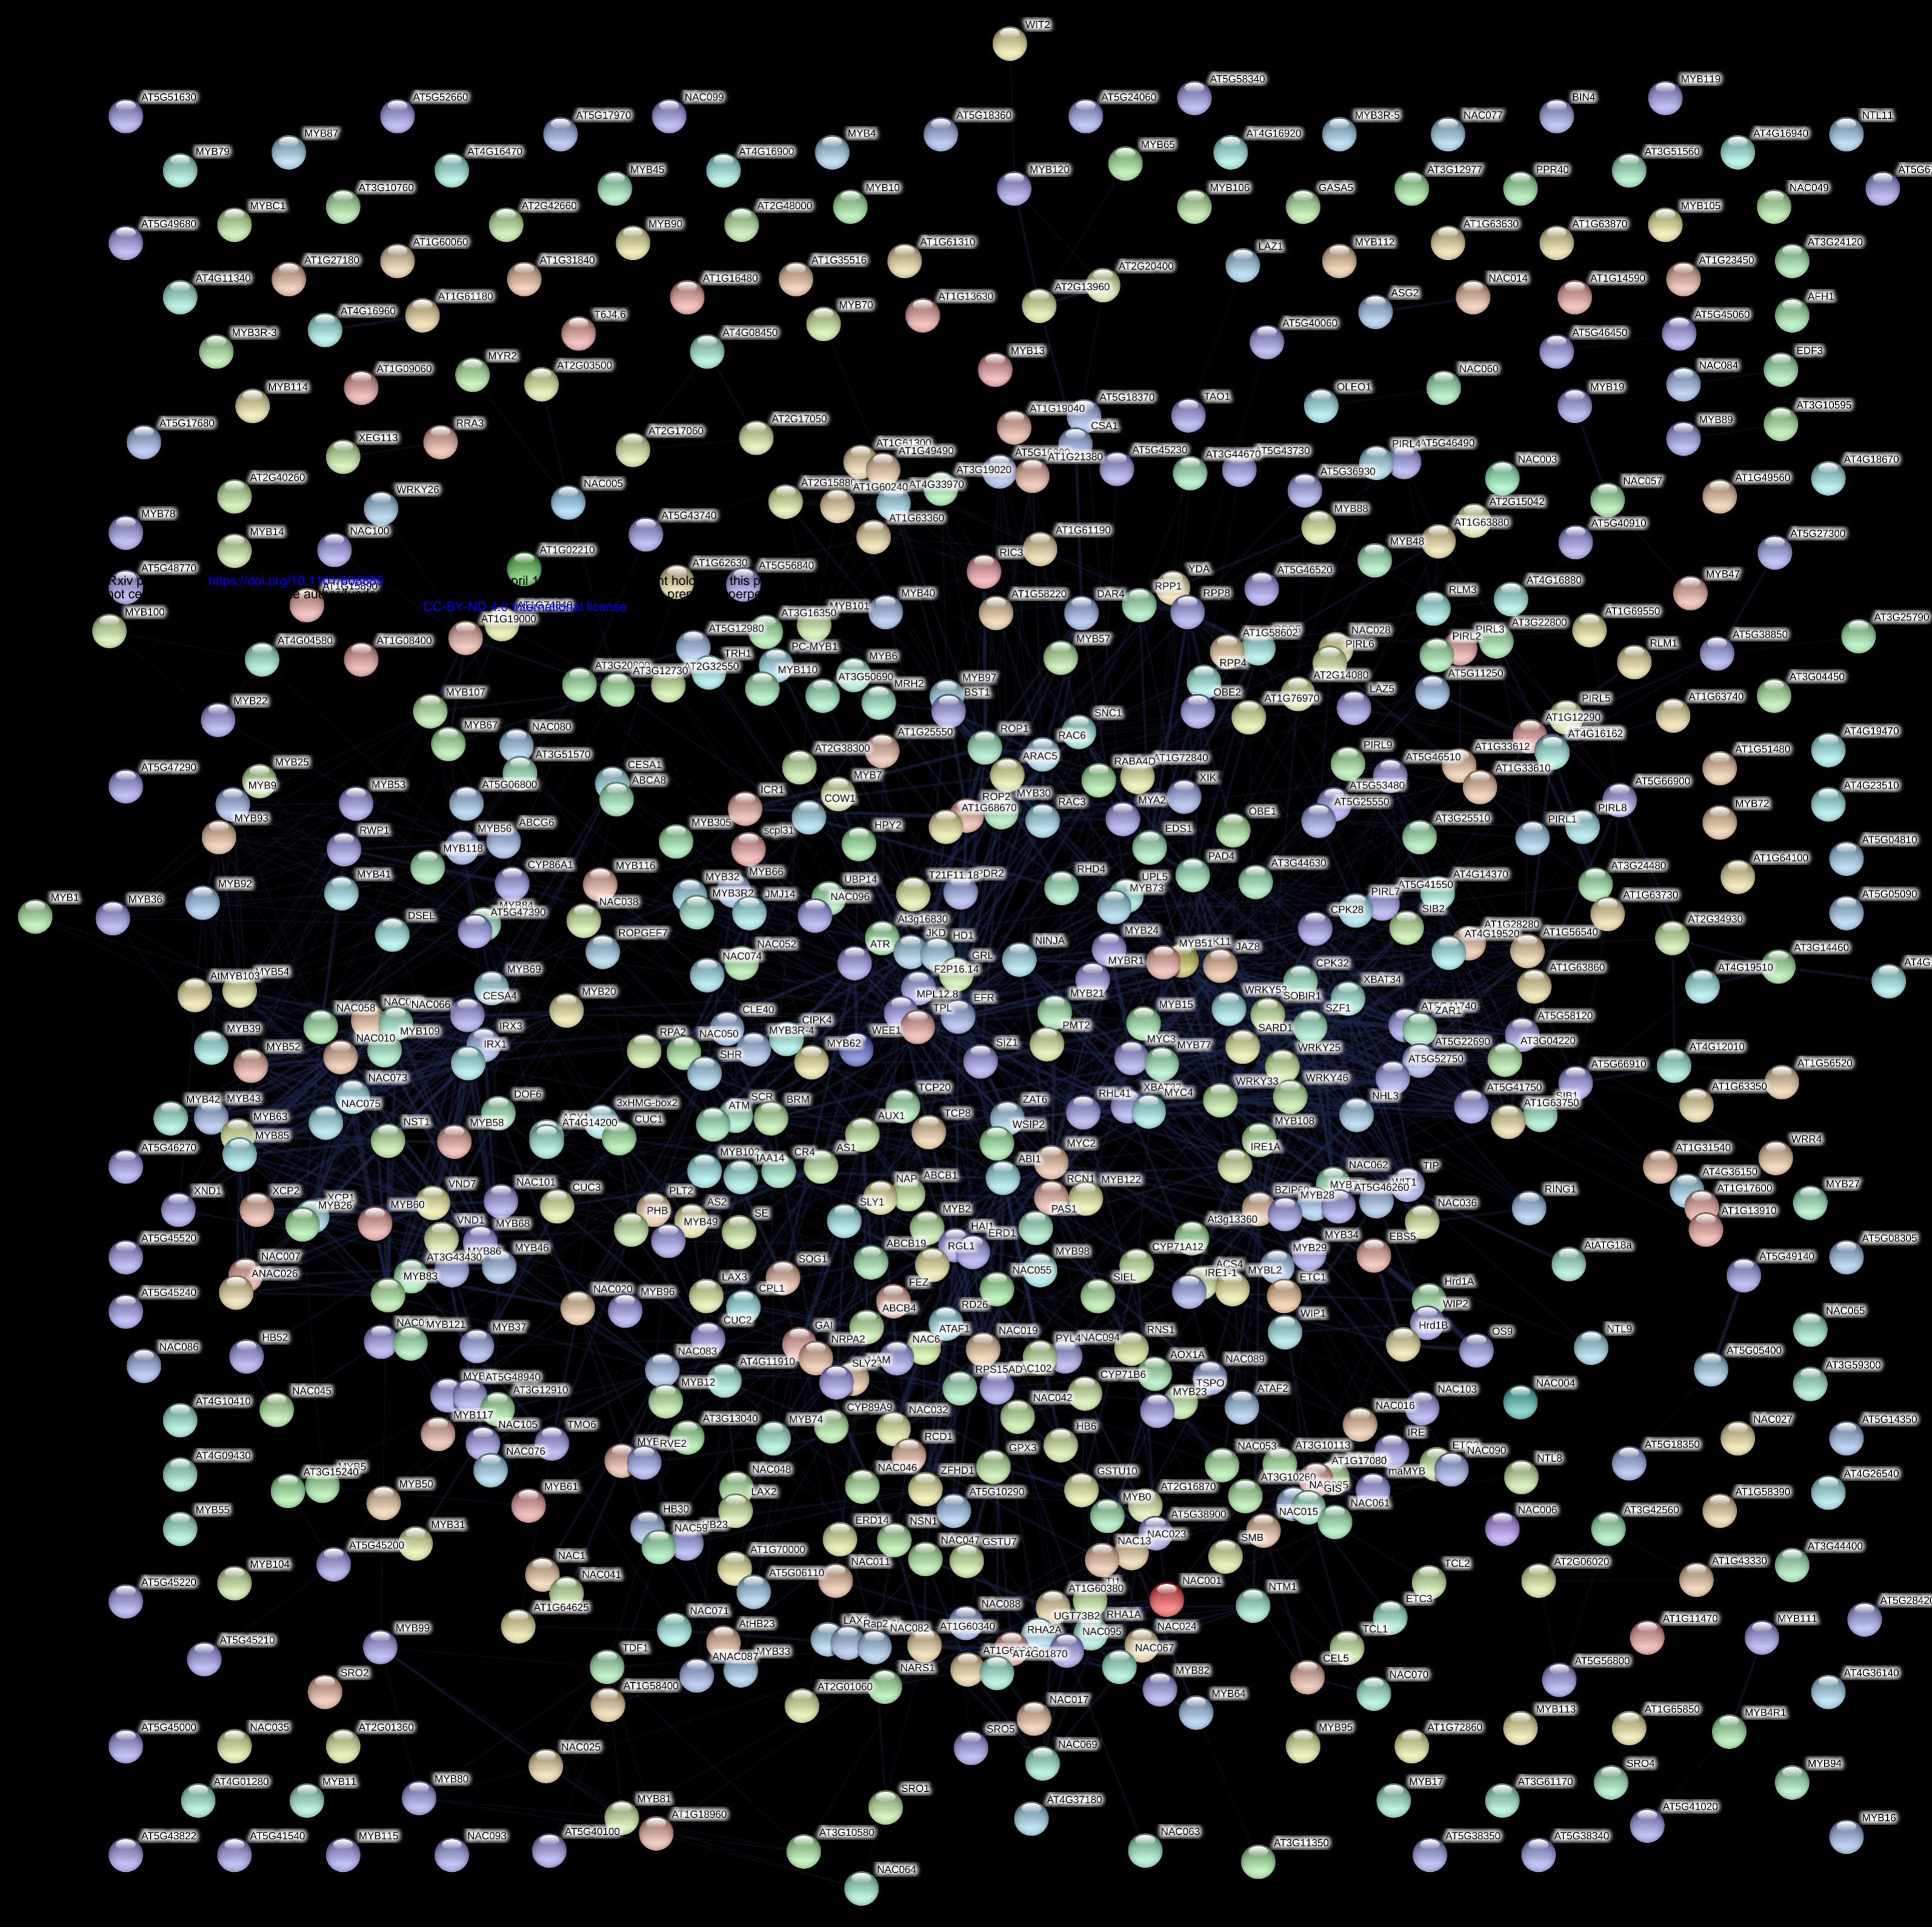

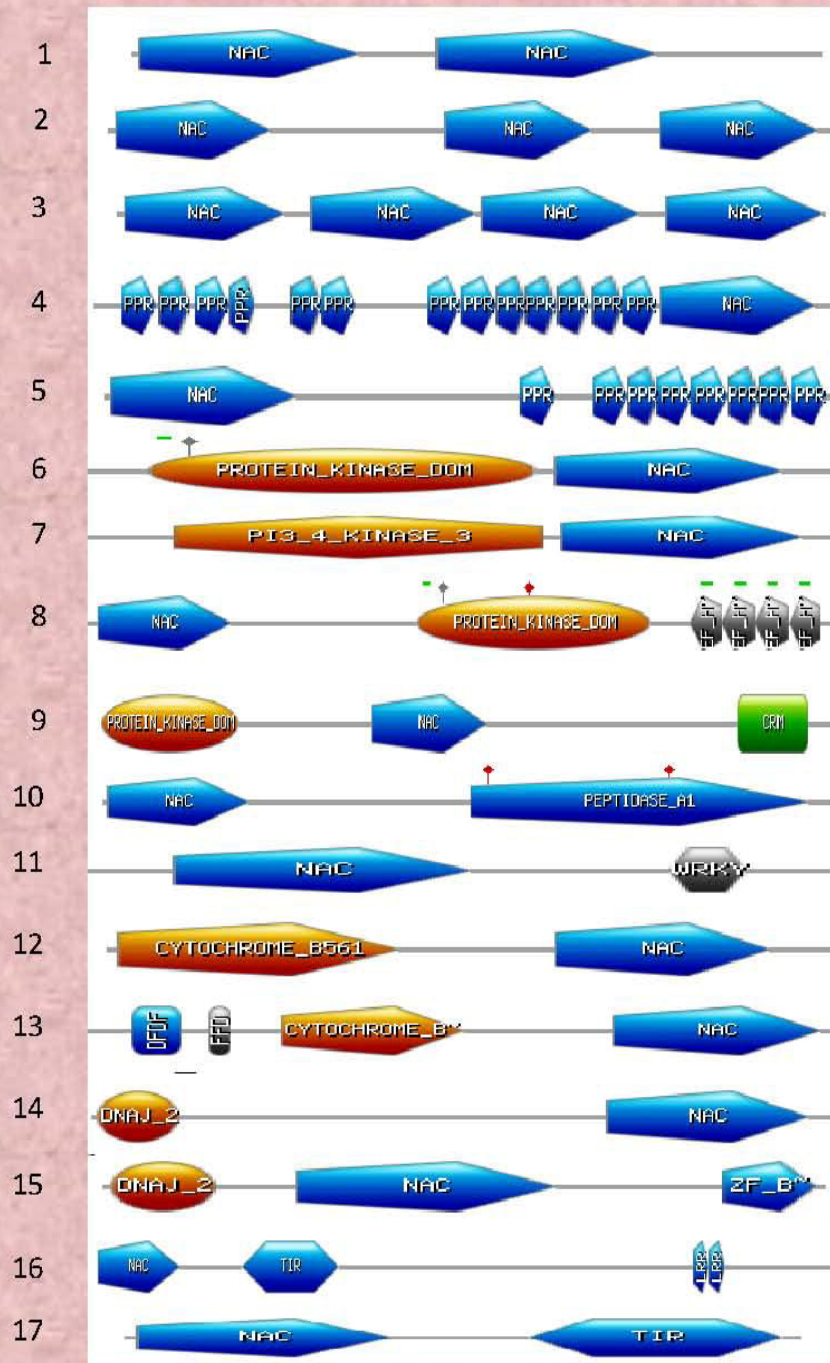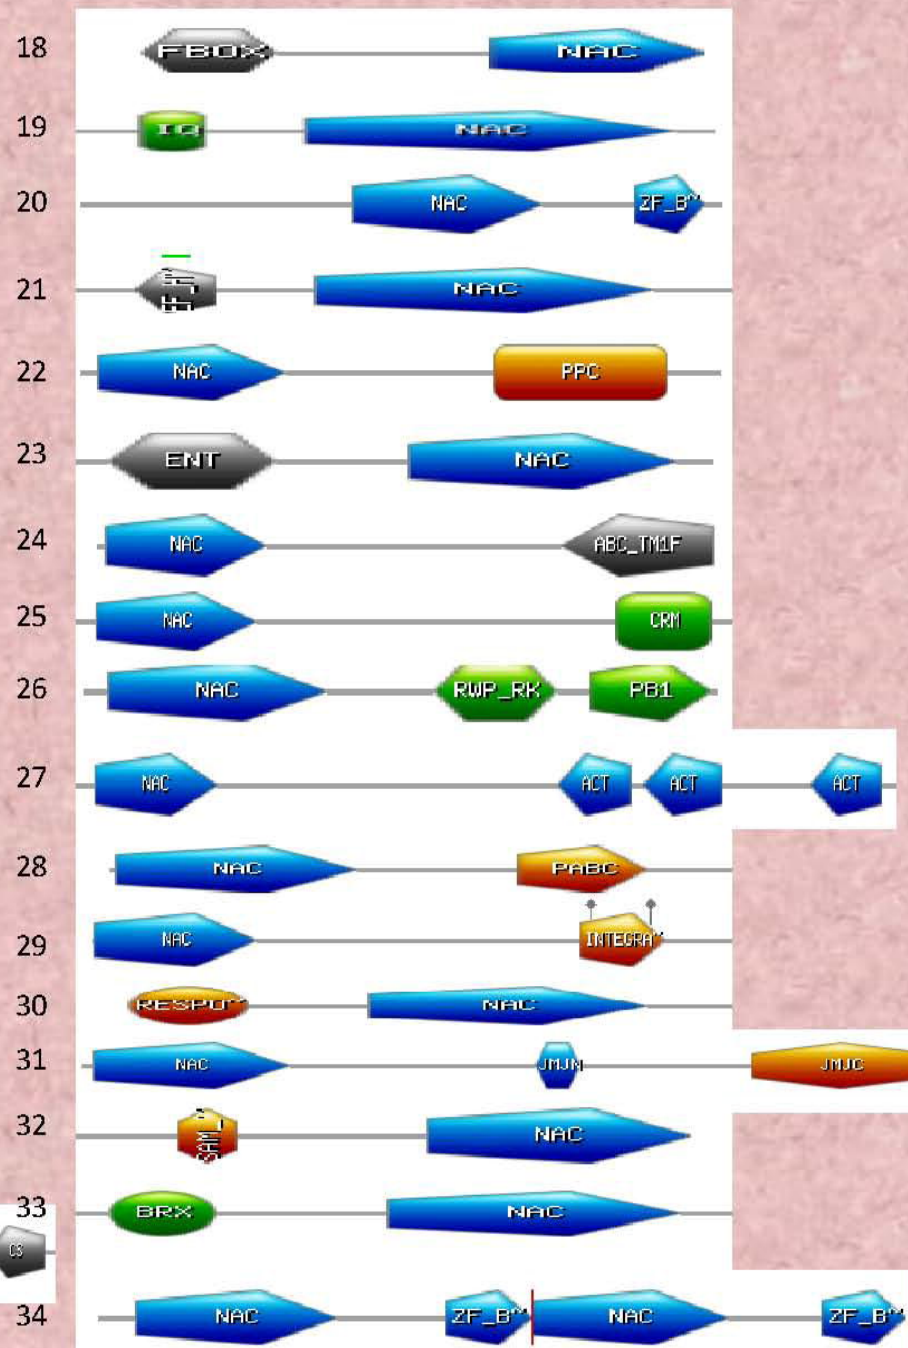

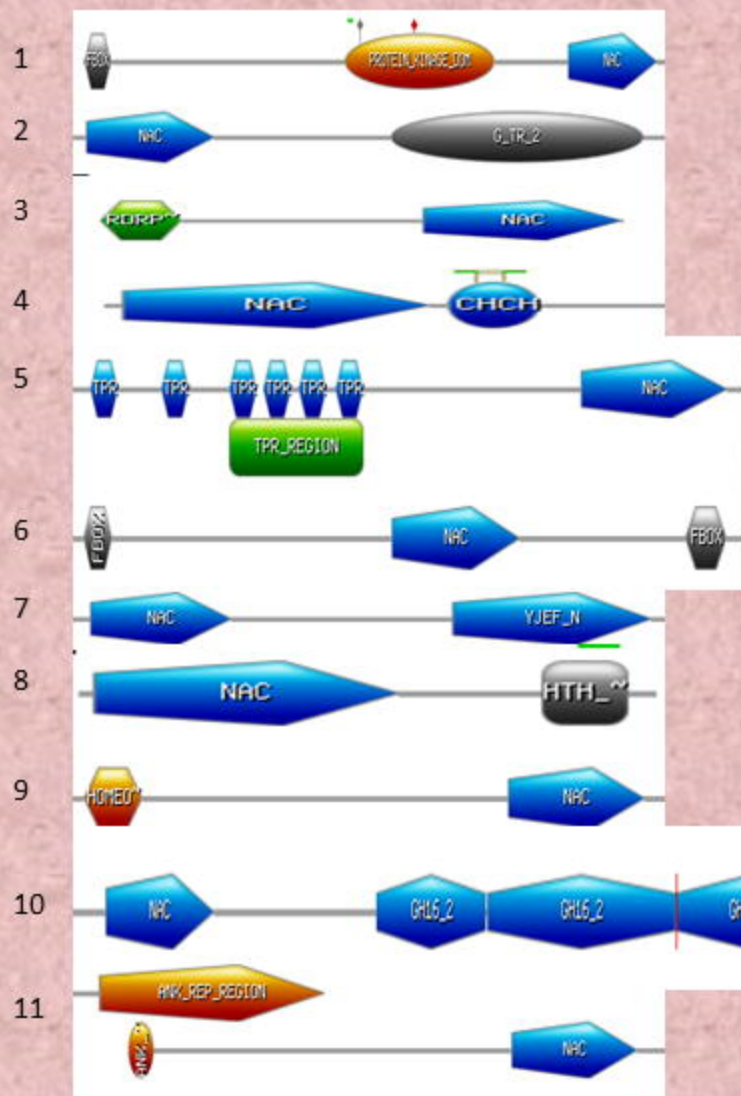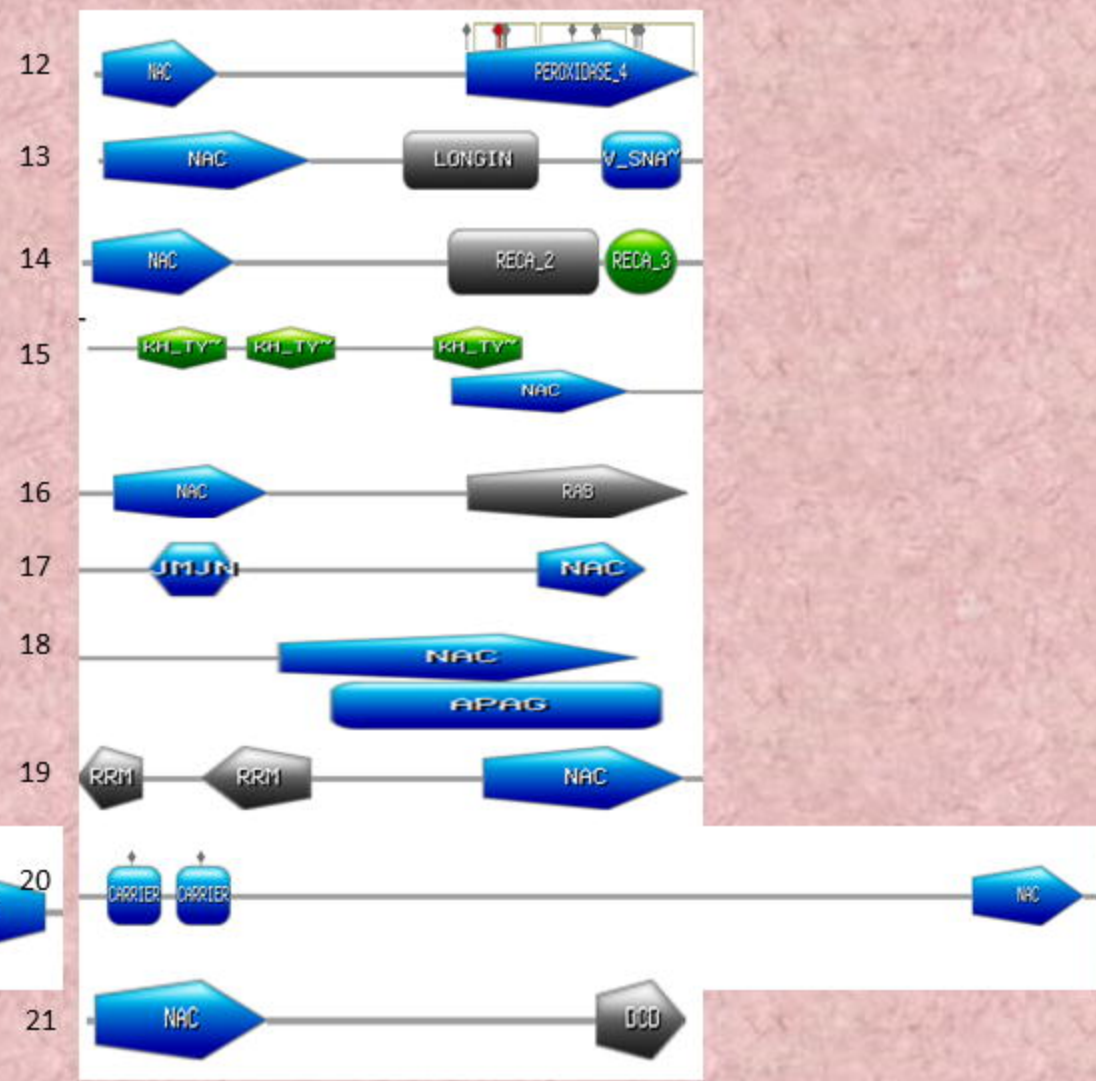



## Gene Expression of NAC TFs in leaf

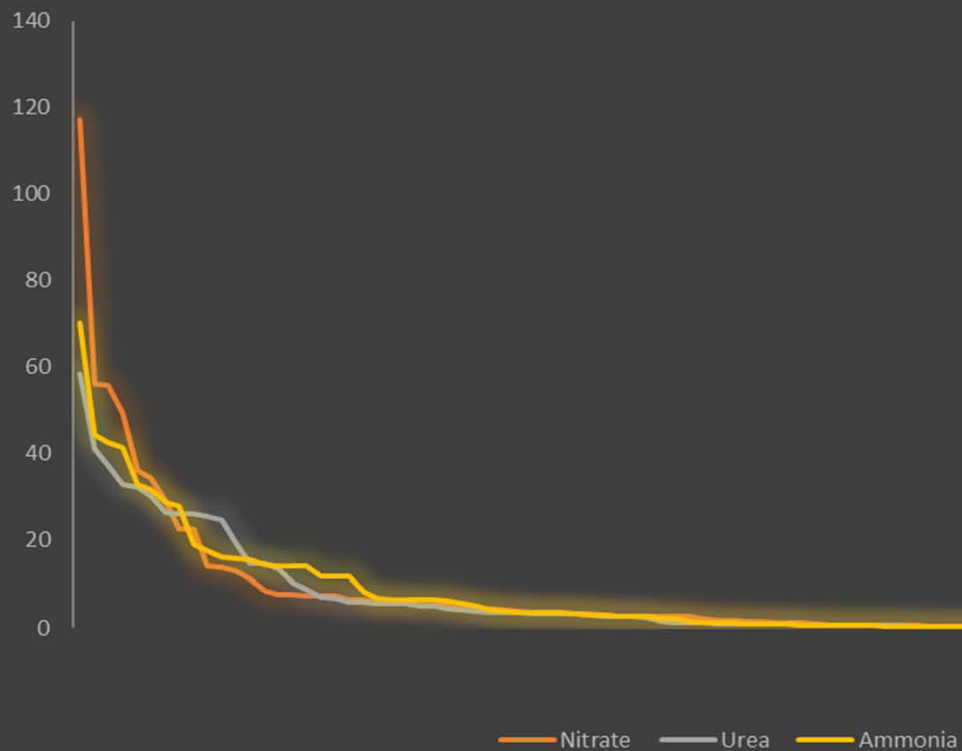

# Gene expression of NAC TF in roots

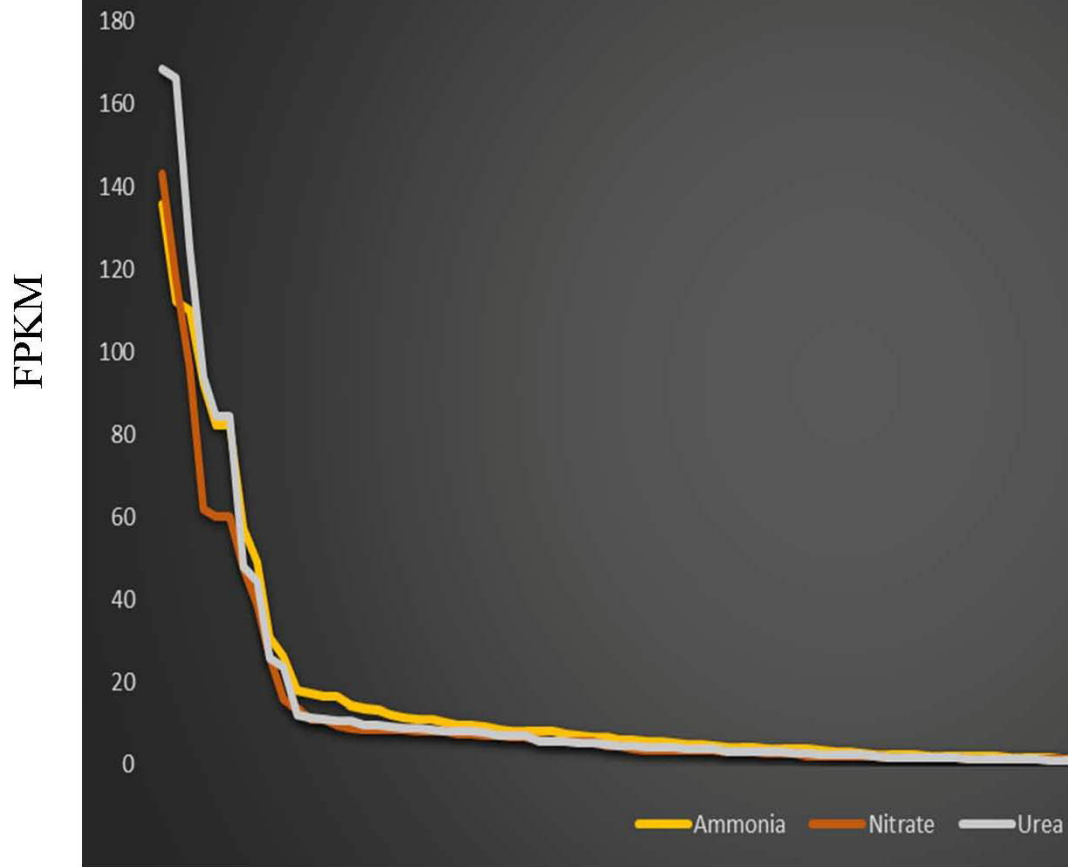

Genes

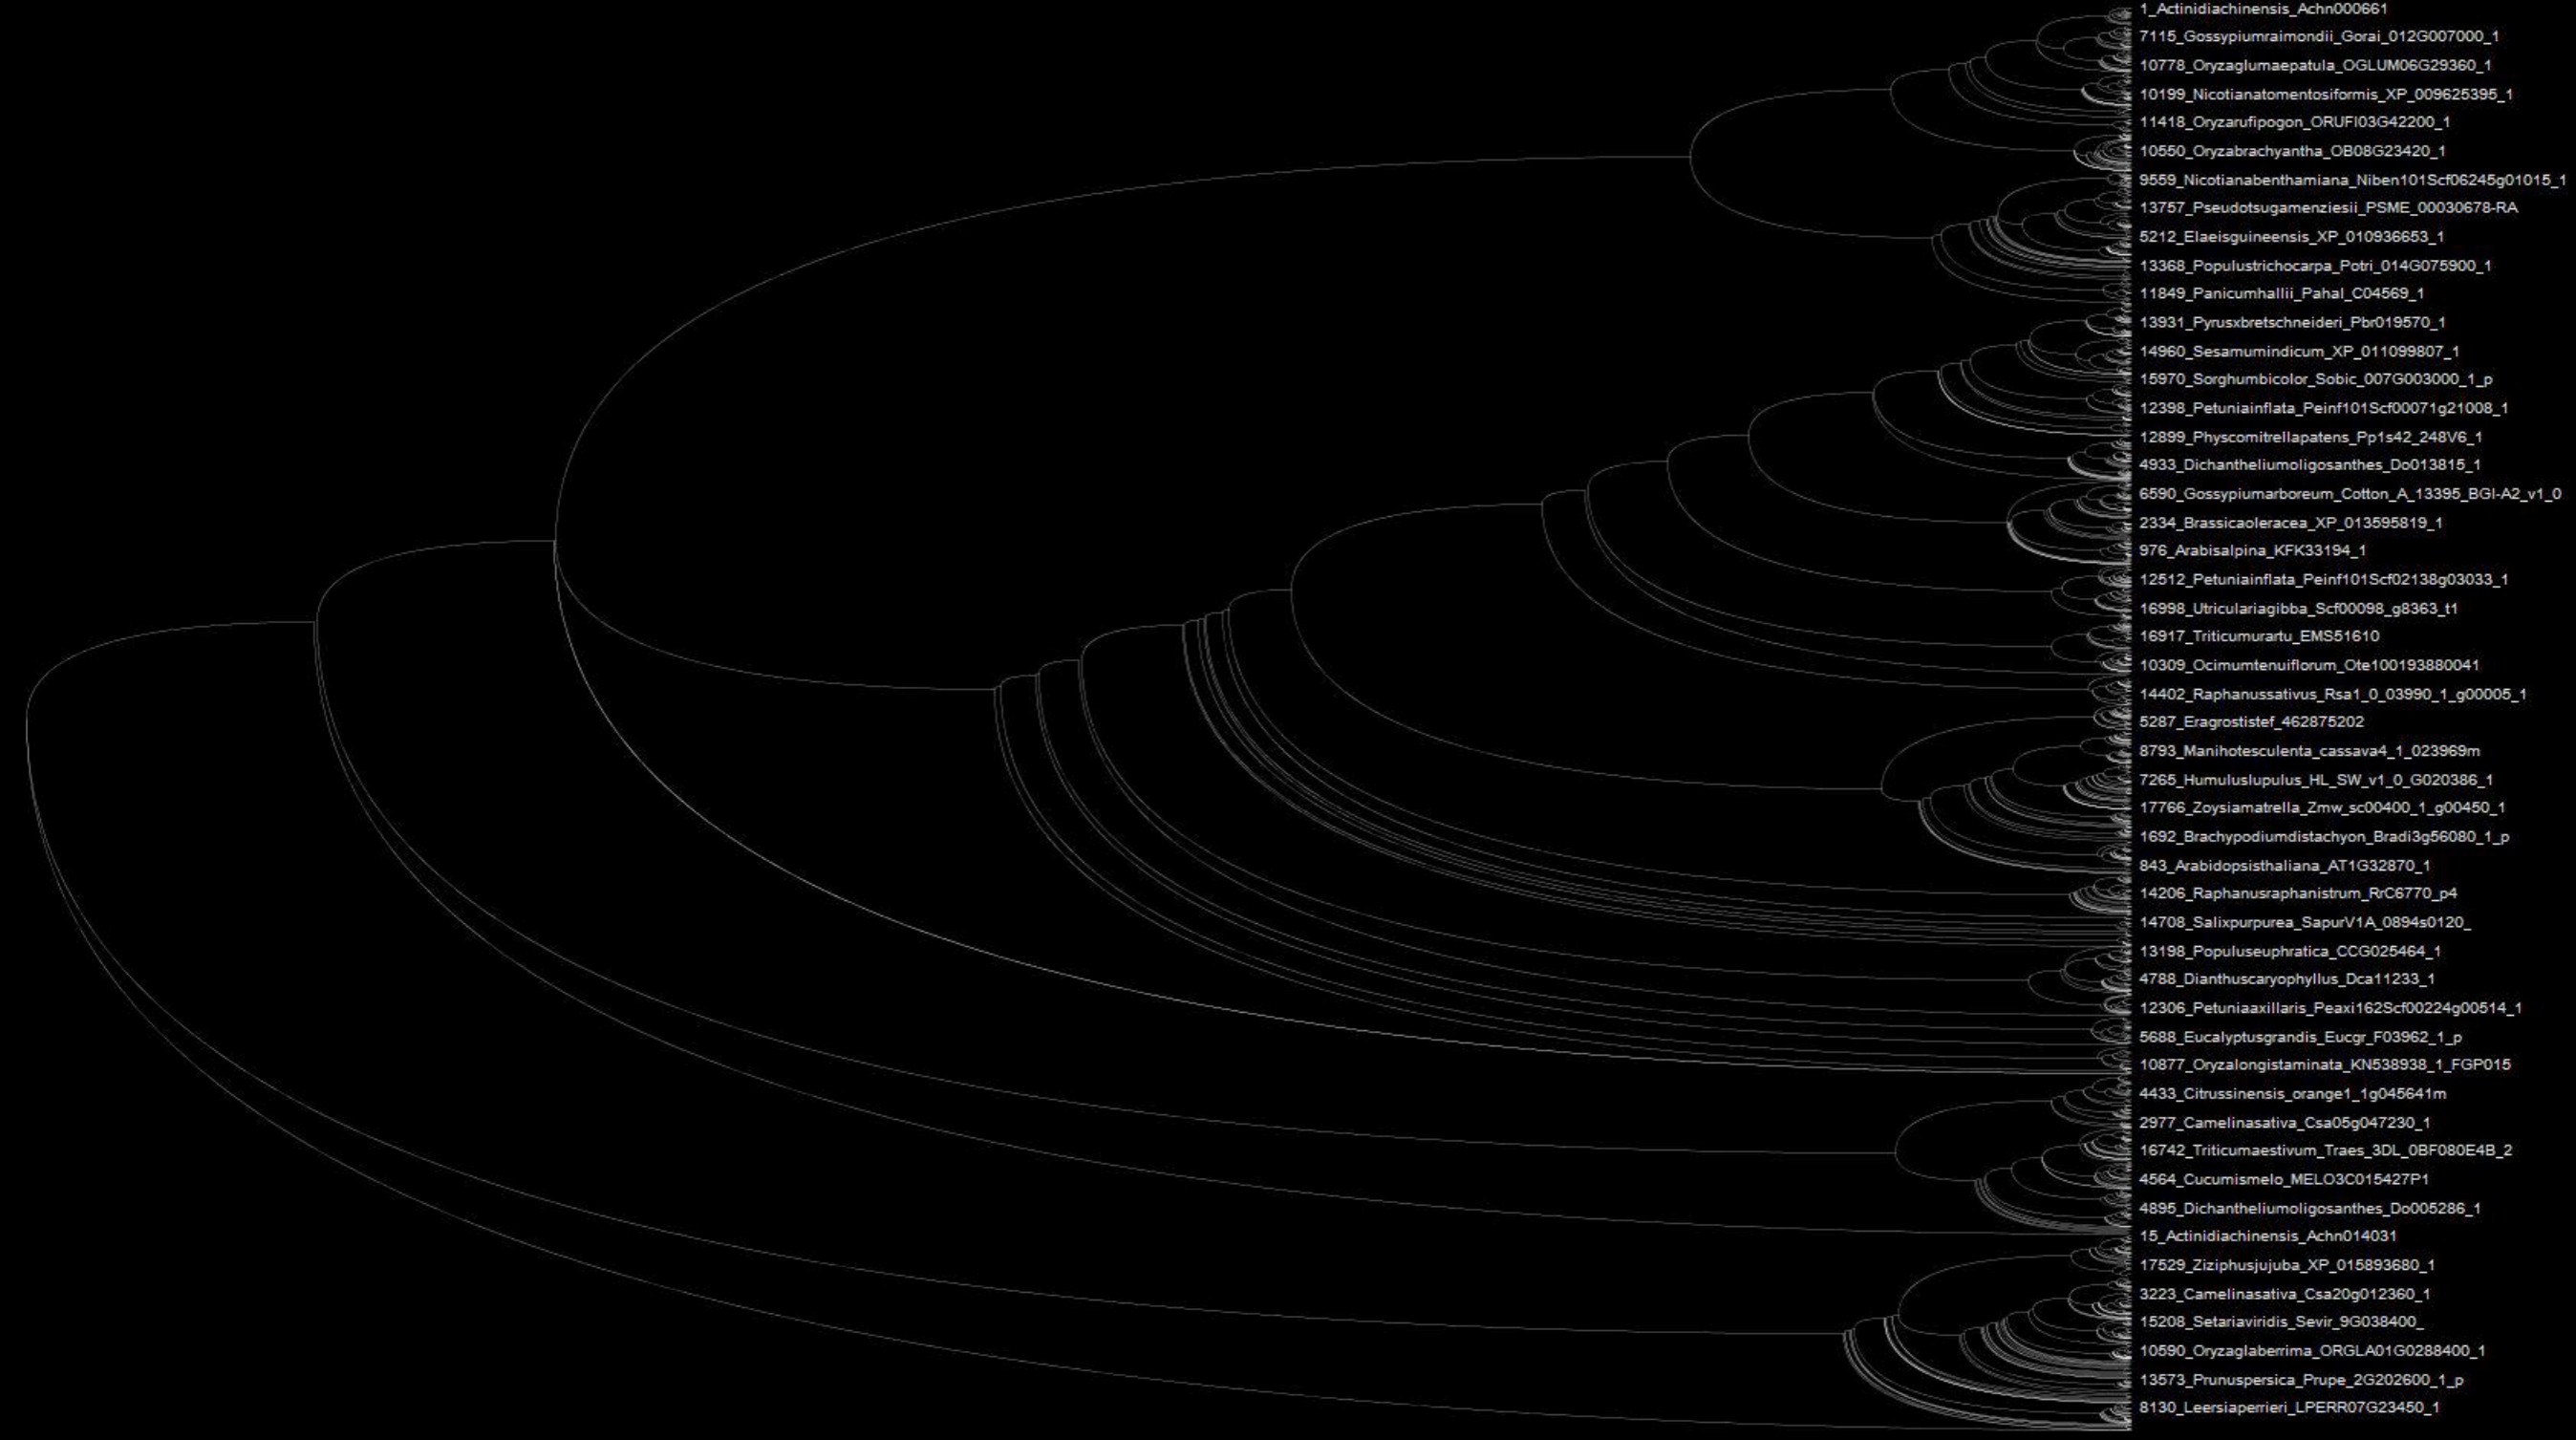

Source: http://biorxiv.org/content/10.1101/608885v1.full.pdf
